# Supplementary material for: Optoelectronic properties of oligomers based on tetrazine, benzothiadiazole, benzodithiophene and thiophene moieties for photovoltaic applications: a theoretical study
Source: Royal Society of Chemistry journal article supplement (doi:10.1039/c5ra15907e), 2015-01-01

## Supporting Information

### ***Optoelectronic properties of oligomers based on tetrazine, benzothiadiazole, benzodithiophene and thiophene moieties, for photovoltaic application. A theoretical study.***

Massimo Ottonelli<sup>\*a</sup>, Marina Alloisio<sup>a</sup>, Ivana Moggio<sup>b</sup>, M. Isabel Martinez Espinosa<sup>a</sup>  
and Eduardo Arias<sup>b</sup>

<sup>a</sup>*Dipartimento di Chimica e Chimica Industriale, Università degli Studi di Genova, via Dodecaneso 31 I-16146 Genova Italia.*

<sup>b</sup>*Centro de Investigación en Química Aplicada, Blvd. Enrique Reyna 140, 25294, Saltillo, México.*

E-mail corresponding author : massimo.ottonelli@unige.it

#### **List of the supporting information:**

1. **Table S1.** Optimized geometry (cartesian coordinates in Å) of the A-G oligomers at the B3LYP/6-311G(d,p) level.
2. **Figure S1:** Plots of the simulated absorption spectra, calculated at the TD-B3LYP/6-311G(d,p) level for the A-G oligomers.

**Table S1:** Optimized geometry (cartesian coordinates in Å) of the A-G oligomers at the B3LYP/6-311G(d,p) level.

**1) A1<sub>1</sub>**

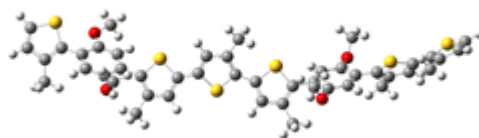

|    |   |          |         |         |    |   |          |         |         |    |   |          |         |         |
|----|---|----------|---------|---------|----|---|----------|---------|---------|----|---|----------|---------|---------|
| 1  | C | -13.2796 | -0.4734 | 1.4800  | 34 | C | 10.0030  | -1.5294 | -0.5929 | 67 | H | 15.3433  | -3.1249 | 0.5937  |
| 2  | C | -12.6395 | -1.0657 | 0.4094  | 35 | C | 11.0538  | -0.7269 | -0.0874 | 68 | H | -13.5706 | 1.2987  | 2.6545  |
| 3  | S | -13.6167 | -2.3592 | -0.2667 | 36 | C | 10.7134  | 0.5293  | 0.4203  | 69 | H | -12.1888 | 0.3317  | 3.1665  |
| 4  | C | -14.8790 | -2.0741 | 0.8792  | 37 | C | 8.6969   | -1.0488 | -0.6048 | 70 | H | -9.8941  | -0.0412 | -3.8991 |
| 5  | C | -14.5567 | -1.0624 | 1.7338  | 38 | C | 8.3706   | 0.2296  | -0.1173 | 71 | H | -8.2628  | 0.2541  | -3.2788 |
| 6  | C | -9.6536  | -0.5153 | -1.8201 | 39 | C | 9.4068   | 1.0112  | 0.4158  | 72 | H | -3.6576  | 4.2335  | -0.0451 |
| 7  | C | -8.9143  | -0.3134 | -0.6746 | 40 | O | 10.3576  | -2.7553 | -1.0680 | 73 | H | -2.7718  | 4.1230  | -1.5739 |
| 8  | S | -9.9175  | -0.4616 | 0.7555  | 41 | O | 9.1747   | 2.2687  | 0.9343  | 74 | H | 0.9752   | -1.4570 | 3.1019  |
| 9  | C | -11.3492 | -0.7804 | -0.1994 | 42 | C | 14.7894  | -1.1615 | -0.2345 | 75 | H | -0.5309  | -0.6246 | 2.6992  |
| 10 | C | -11.0242 | -0.7815 | -1.5341 | 43 | C | 14.6010  | -2.3880 | 0.3274  | 76 | H | 6.6866   | 3.4103  | -2.1607 |
| 11 | C | -5.1380  | -0.3749 | -0.9917 | 44 | S | 12.9247  | -2.7268 | 0.5662  | 77 | H | 7.5522   | 3.7326  | -0.6489 |
| 12 | C | -4.7446  | 0.7450  | -0.2457 | 45 | C | 12.4605  | -1.1645 | -0.0837 | 78 | H | 13.8366  | 1.7007  | -0.4036 |
| 13 | C | -5.7582  | 1.4782  | 0.4034  | 46 | C | 13.5737  | -0.4475 | -0.4734 | 79 | H | 14.2907  | 0.9538  | -1.9320 |
| 14 | C | -6.4716  | -0.7450 | -1.1245 | 47 | C | -12.7477 | 0.6786  | 2.2907  | 80 | H | -7.2429  | -3.8162 | -1.9088 |
| 15 | C | -7.4890  | 0.0205  | -0.5204 | 48 | C | -9.1215  | -0.4166 | -3.2236 | 81 | H | -7.9635  | -2.9107 | -0.5535 |
| 16 | C | -7.0933  | 1.1209  | 0.2528  | 49 | C | -3.4102  | 3.5713  | -0.8791 | 82 | H | 9.3639   | 1.7915  | 2.9590  |
| 17 | O | -6.7614  | -1.8463 | -1.8995 | 50 | C | 0.3352   | -1.1375 | 2.2766  | 83 | H | 8.5580   | 3.3291  | 2.5502  |
| 18 | O | -5.4704  | 2.5902  | 1.1643  | 51 | C | 7.2657   | 2.9498  | -1.3563 | 84 | H | 9.8650   | -4.5257 | -1.8803 |
| 19 | C | -1.3057  | 2.2735  | -0.1838 | 52 | C | 13.5632  | 0.9149  | -1.1165 | 85 | H | 8.5986   | -3.8528 | -0.8220 |
| 20 | C | -0.8256  | 1.0506  | 0.2248  | 53 | C | -7.0666  | -3.0381 | -1.1667 | 86 | H | -4.8207  | 3.2742  | 2.9596  |
| 21 | S | -2.1512  | -0.0902 | 0.3384  | 54 | C | 8.6650   | 2.2809  | 2.2714  | 87 | H | -5.7109  | 1.7315  | 3.0522  |
| 22 | C | -3.3238  | 1.1190  | -0.1504 | 55 | C | 9.3499   | -3.6142 | -1.5827 | 88 | H | -12.0795 | 1.3116  | 1.7051  |
| 23 | C | -2.7116  | 2.3276  | -0.4022 | 56 | C | -4.9776  | 2.3092  | 2.4785  | 89 | H | -8.7888  | -1.3909 | -3.5915 |
| 24 | C | 2.5251   | -0.2737 | 1.2662  | 57 | H | -15.7801 | -2.6670 | 0.8503  | 90 | H | -4.3451  | 3.3339  | -1.3878 |
| 25 | C | 3.0772   | 0.6122  | 0.3719  | 58 | H | -15.2143 | -0.7229 | 2.5244  | 91 | H | -0.0311  | -2.0410 | 1.7780  |
| 26 | S | 1.8104   | 1.4899  | -0.4546 | 59 | H | -11.7664 | -0.9355 | -2.3077 | 92 | H | 8.1879   | 2.5515  | -1.7811 |
| 27 | C | 0.5542   | 0.6735  | 0.4652  | 60 | H | -4.3941  | -0.9670 | -1.5113 | 93 | H | 12.5838  | 1.1649  | -1.5250 |
| 28 | C | 1.1052   | -0.2542 | 1.3311  | 61 | H | -7.8407  | 1.7395  | 0.7351  | 94 | H | -6.2237  | -3.3282 | -0.5296 |
| 29 | C | 6.4624   | 1.8721  | -0.6819 | 62 | H | -0.6588  | 3.1308  | -0.3239 | 95 | H | 7.6896   | 1.7882  | 2.3304  |
| 30 | C | 6.9785   | 0.7041  | -0.1641 | 63 | H | 4.4683   | 2.7967  | -0.8763 | 96 | H | 8.8568   | -3.1751 | -2.4568 |
| 31 | S | 5.7040   | -0.3135 | 0.4875  | 64 | H | 11.4808  | 1.1572  | 0.8550  | 97 | H | -4.0301  | 1.7637  | 2.4402  |
| 32 | C | 4.4710   | 0.8582  | 0.0743  | 65 | H | 7.9033   | -1.6465 | -1.0310 | 98 | H | 3.1281   | -0.9124 | 1.9001  |
| 33 | C | 5.0469   | 1.9463  | -0.5363 | 66 | H | 15.7654  | -0.7674 | -0.4894 |    |   |          |         |         |

2)  $A_{1g}$ 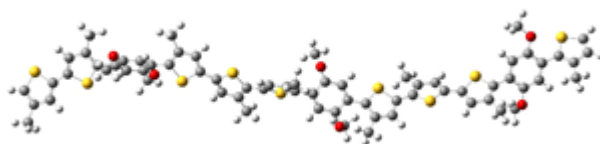

|    |   |         |         |         |    |   |         |         |         |     |   |          |          |          |
|----|---|---------|---------|---------|----|---|---------|---------|---------|-----|---|----------|----------|----------|
| 1  | C | 3.0191  | 0.5628  | -2.4929 | 41 | C | 24.9728 | 6.9546  | -2.1666 | 81  | C | 24.1267  | 3.5280   | 1.3075   |
| 2  | C | 3.3570  | -0.0598 | -1.3162 | 42 | C | 24.8017 | 4.5881  | -0.6993 | 82  | C | 37.4374  | 14.0160  | 0.7098   |
| 3  | S | 1.9094  | -0.5069 | -0.4337 | 43 | C | 23.6838 | 5.0059  | -1.4490 | 83  | C | 39.0493  | 8.8477   | 5.2636   |
| 4  | C | 0.8945  | 0.1374  | -1.6849 | 44 | C | 23.8000 | 6.2078  | -2.1617 | 84  | C | 24.8548  | 9.3189   | -2.1628  |
| 5  | C | 1.6127  | 0.6817  | -2.7126 | 45 | O | 24.7795 | 3.4241  | 0.0373  | 85  | H | 4.3362   | -2.0043  | 0.5625   |
| 6  | C | 6.4338  | -1.3255 | 0.4473  | 46 | O | 24.9995 | 8.1105  | -2.9161 | 86  | H | 11.6420  | -1.4342  | -0.4921  |
| 7  | C | 7.1375  | -0.3616 | -0.2412 | 47 | C | 29.3112 | 8.3653  | -2.1364 | 87  | H | 8.2245   | 2.0402   | 0.1839   |
| 8  | S | 6.0702  | 0.5825  | -1.2685 | 48 | C | 29.4857 | 8.4555  | -0.7746 | 88  | H | 15.9353  | 0.3466   | 0.9410   |
| 9  | C | 4.6727  | -0.3499 | -0.7810 | 49 | S | 28.1519 | 7.6631  | 0.0401  | 89  | H | 1.3249   | 0.8023   | -4.8463  |
| 10 | C | 5.0445  | -1.3093 | 0.1278  | 50 | C | 27.3818 | 7.2460  | -1.4794 | 90  | H | -0.0819  | 1.2922   | -3.8959  |
| 11 | C | 10.3319 | 1.6414  | 0.0798  | 51 | C | 28.1312 | 7.6842  | -2.5497 | 91  | H | 6.3036   | -2.4946  | 2.2415   |
| 12 | C | 11.3347 | 0.6531  | -0.0722 | 52 | C | 31.9956 | 10.0984 | 1.4766  | 92  | H | 7.3055   | -3.2260  | 0.9763   |
| 13 | C | 10.9098 | -0.6554 | -0.3223 | 53 | C | 32.9377 | 9.8222  | 0.5145  | 93  | H | 13.7314  | -1.9095  | 1.0397   |
| 14 | C | 8.9865  | 1.2911  | 0.0205  | 54 | S | 32.1970 | 8.9564  | -0.8121 | 94  | H | 14.1720  | -0.9291  | 2.4344   |
| 15 | C | 8.5713  | -0.0343 | -0.2011 | 55 | C | 30.6102 | 9.0278  | -0.0588 | 95  | H | 9.7185   | -2.3678  | -2.6743  |
| 16 | C | 9.5648  | -1.0073 | -0.3915 | 56 | C | 30.6792 | 9.6570  | 1.1711  | 96  | H | 8.6962   | -3.6851  | -2.0412  |
| 17 | O | 10.7686 | 2.9119  | 0.3030  | 57 | C | 36.5552 | 10.5376 | -0.2327 | 97  | H | 10.3945  | 4.8610   | 0.6175   |
| 18 | O | 9.2504  | -2.3276 | -0.6389 | 58 | C | 36.7163 | 10.7586 | 1.1181  | 98  | H | 9.1842   | 4.0638   | -0.4202  |
| 19 | C | 15.0513 | 0.7613  | 0.4720  | 59 | S | 35.2042 | 10.5201 | 1.9796  | 99  | H | 1.3168   | 2.3640   | -4.0283  |
| 20 | C | 15.0910 | 1.8764  | -0.3301 | 60 | C | 34.3484 | 10.1411 | 0.5006  | 100 | H | 7.926489 | -1.87196 | 1.904195 |
| 21 | S | 13.4783 | 2.2998  | -0.8499 | 61 | C | 35.2132 | 10.1947 | -0.5660 | 101 | H | 12.48463 | -1.01909 | 1.91516  |
| 22 | C | 12.7719 | 0.9507  | 0.0223  | 62 | C | 39.4425 | 10.6583 | 3.7403  | 102 | H | 7.996976 | -2.06542 | -2.2959  |
| 23 | C | 13.7498 | 0.2253  | 0.6767  | 63 | C | 40.2754 | 11.7385 | 3.3621  | 103 | H | 9.181621 | 3.778547 | 1.345424 |
| 24 | C | 1.0086  | 1.3180  | -3.9343 | 64 | C | 39.8785 | 12.4973 | 2.2582  | 104 | H | 3.760878 | 0.908727 | -3.20238 |
| 25 | C | 7.0240  | -2.2807 | 1.4479  | 65 | C | 38.2997 | 10.3621 | 3.0031  | 105 | H | 15.37799 | 4.555853 | -1.33281 |
| 26 | C | 13.5148 | -0.9710 | 1.5618  | 66 | C | 37.9253 | 11.1162 | 1.8764  | 106 | H | 20.4963  | 1.552398 | -1.99266 |
| 27 | C | 8.8946  | -2.6144 | -1.9953 | 67 | C | 38.7315 | 12.2089 | 1.5230  | 107 | H | 26.82853 | 4.939549 | -0.16653 |
| 28 | C | 9.8147  | 3.9518  | 0.4685  | 68 | O | 39.8413 | 9.9440  | 4.8288  | 108 | H | 22.96753 | 6.567601 | -2.7544  |
| 29 | C | 17.5710 | 4.4470  | -1.5090 | 69 | O | 38.4273 | 13.0167 | 0.4463  | 109 | H | 30.02013 | 8.786195 | -2.83884 |
| 30 | C | 18.5565 | 3.5106  | -1.2540 | 70 | C | 43.7020 | 12.7595 | 4.5363  | 110 | H | 34.89641 | 9.994928 | -1.58251 |
| 31 | S | 17.8565 | 2.0224  | -0.6323 | 71 | C | 43.1961 | 12.7554 | 5.8012  | 111 | H | 40.46433 | 13.35784 | 1.96107  |
| 32 | C | 16.2345 | 2.6701  | -0.7236 | 72 | S | 41.5420 | 12.2600 | 5.8224  | 112 | H | 37.69041 | 9.509153 | 3.267477 |
| 33 | C | 16.2717 | 3.9580  | -1.2034 | 73 | C | 41.5178 | 12.0773 | 4.0774  | 113 | H | 44.72901 | 13.01545 | 4.307081 |
| 34 | C | 22.2305 | 2.9007  | -1.7896 | 74 | C | 42.7528 | 12.3763 | 3.5380  | 114 | H | 43.70094 | 12.98903 | 6.72613  |
| 35 | C | 22.4343 | 4.2296  | -1.4845 | 75 | C | 17.7974 | 5.8298  | -2.0605 | 115 | H | 16.90261 | 6.181097 | -2.57909 |
| 36 | S | 20.9158 | 5.0359  | -1.1407 | 76 | C | 23.3074 | 1.9270  | -2.1829 | 116 | H | 18.02017 | 6.550919 | -1.26697 |
| 37 | C | 19.9955 | 3.5724  | -1.4257 | 77 | C | 27.7865 | 7.4640  | -3.9972 | 117 | H | 22.92224 | 1.204534 | -2.90682 |
| 38 | C | 20.8524 | 2.5458  | -1.7491 | 78 | C | 29.5173 | 9.9019  | 2.0970  | 118 | H | 24.16295 | 2.436072 | -2.62863 |
| 39 | C | 25.9813 | 5.3236  | -0.7220 | 79 | C | 37.6522 | 10.6099 | -1.2589 | 119 | H | 27.23031 | 8.311344 | -4.40685 |
| 40 | C | 26.1079 | 6.5085  | -1.4607 | 80 | C | 43.1215 | 12.2876 | 2.0800  | 120 | H | 28.69567 | 7.333024 | -4.5894  |

continues

### A<sub>1</sub> geometry continuation

|     |   |          |          |          |     |   |          |          |          |     |   |          |          |          |
|-----|---|----------|----------|----------|-----|---|----------|----------|----------|-----|---|----------|----------|----------|
| 121 | H | 29.72924 | 10.74746 | 2.754936 | 130 | H | 37.31864 | 14.58255 | -0.21368 | 139 | H | 38.62674 | 10.40325 | -0.8146  |
| 122 | H | 28.59949 | 10.12174 | 1.548359 | 131 | H | 39.55361 | 8.45203  | 6.143417 | 140 | H | 42.41778 | 11.67188 | 1.519381 |
| 123 | H | 37.47655 | 9.88371  | -2.05659 | 132 | H | 38.03746 | 9.166124 | 5.536886 | 141 | H | 24.62393 | 4.272394 | 1.939231 |
| 124 | H | 37.71138 | 11.60518 | -1.70724 | 133 | H | 24.87666 | 10.13466 | -2.88496 | 142 | H | 36.4793  | 13.56422 | 0.984597 |
| 125 | H | 43.14743 | 13.27613 | 1.608113 | 134 | H | 23.89792 | 9.33133  | -1.62905 | 143 | H | 38.99121 | 8.066563 | 4.497727 |
| 126 | H | 44.11805 | 11.85174 | 1.96772  | 135 | H | 18.62912 | 5.853498 | -2.76688 | 144 | H | 25.67412 | 9.443913 | -1.44851 |
| 127 | H | 24.20704 | 2.546481 | 1.773808 | 136 | H | 23.68033 | 1.376357 | -1.31521 | 145 | H | 32.23167 | 10.64376 | 2.382224 |
| 128 | H | 23.07093 | 3.790752 | 1.192775 | 137 | H | 27.16204 | 6.57935  | -4.12813 | 146 | H | -0.17863 | 0.077105 | -1.5833  |
| 129 | H | 37.76664 | 14.689   | 1.509397 | 138 | H | 29.31775 | 9.03376  | 2.733936 |     |   |          |          |          |

### 3) A<sub>2</sub>

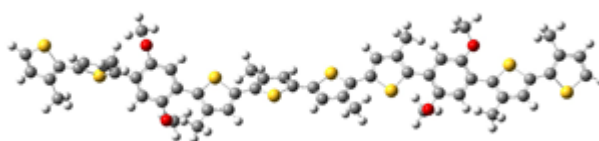

|    |   |         |        |         |    |   |         |        |          |    |   |         |         |          |
|----|---|---------|--------|---------|----|---|---------|--------|----------|----|---|---------|---------|----------|
| 1  | C | 2.2604  | 3.6446 | 2.5603  | 29 | C | 19.2558 | 8.7398 | -6.6396  | 57 | S | 27.7701 | 8.5688  | -14.4325 |
| 2  | C | 2.2520  | 4.6029 | 1.5659  | 30 | C | 19.3025 | 7.8890 | -7.7310  | 58 | C | 27.3275 | 9.1350  | -12.8342 |
| 3  | S | 0.6318  | 4.8255 | 0.9251  | 31 | S | 17.9739 | 6.7366 | -7.6775  | 59 | C | 28.3758 | 9.8178  | -12.2494 |
| 4  | C | -0.0160 | 3.6491 | 2.0133  | 32 | C | 17.3562 | 7.4166 | -6.1885  | 60 | C | 28.3442 | 10.4848 | -10.8991 |
| 5  | C | 0.9570  | 3.1111 | 2.8018  | 33 | C | 18.1579 | 8.4581 | -5.7835  | 61 | C | 24.7347 | 6.0595  | -8.9299  |
| 6  | C | 4.5074  | 7.2220 | 0.0689  | 34 | C | 3.4690  | 3.2059 | 3.3439   | 62 | C | 23.6959 | 9.8076  | -14.9056 |
| 7  | C | 5.4892  | 6.2563 | 0.0153  | 35 | C | 11.9716 | 8.0768 | 0.2244   | 63 | C | 31.4808 | 9.0074  | -17.4080 |
| 8  | S | 4.9069  | 4.7312 | 0.6545  | 36 | C | 13.5286 | 4.2285 | -5.1366  | 64 | C | 32.5309 | 8.7925  | -16.5664 |
| 9  | C | 3.3322  | 5.4057 | 1.0136  | 37 | C | 20.2241 | 9.8573 | -6.3554  | 65 | S | 32.0255 | 8.7947  | -14.9132 |
| 10 | C | 3.2960  | 6.7247 | 0.6312  | 38 | C | 5.5629  | 6.2444 | -3.3211  | 66 | C | 30.3596 | 9.1174  | -15.3677 |
| 11 | C | 8.5355  | 6.9735 | -2.1219 | 39 | C | 10.8185 | 4.3451 | 0.5541   | 67 | C | 30.2310 | 9.1955  | -16.7404 |
| 12 | C | 9.5968  | 6.5865 | -1.2917 | 40 | C | 4.6774  | 8.6557 | -0.3533  | 68 | C | 28.9534 | 9.4757  | -17.4865 |
| 13 | C | 9.2686  | 6.0351 | -0.0369 | 41 | C | 21.0980 | 7.3219 | -10.9795 | 69 | H | -1.0724 | 3.4294  | 2.0063   |
| 14 | C | 7.2071  | 6.8554 | -1.7289 | 42 | C | 22.2199 | 7.8818 | -10.3953 | 70 | H | 0.7597  | 2.3585  | 3.5551   |
| 15 | C | 6.8813  | 6.3545 | -0.4527 | 43 | S | 21.8884 | 8.3468 | -8.7371  | 71 | H | 2.4213  | 7.3450  | 0.7837   |
| 16 | C | 7.9411  | 5.9369 | 0.3646  | 44 | C | 20.2204 | 7.8274 | -8.8506  | 72 | H | 8.7397  | 7.4066  | -3.0938  |
| 17 | O | 6.2338  | 7.2861 | -2.6035 | 45 | C | 19.9830 | 7.2983 | -10.0995 | 73 | H | 7.7387  | 5.5468  | 1.3549   |
| 18 | O | 10.2414 | 5.6219 | 0.8468  | 46 | C | 21.0154 | 6.7581 | -12.3747 | 74 | H | 14.1758 | 7.7552  | -1.5426  |
| 19 | C | 13.2412 | 7.3222 | -1.8779 | 47 | C | 24.7955 | 9.0199 | -12.9235 | 75 | H | 15.8434 | 5.0009  | -6.5640  |
| 20 | C | 13.1263 | 6.6674 | -3.0824 | 48 | C | 26.0189 | 8.8046 | -12.2467 | 76 | H | 17.9680 | 9.0212  | -4.8780  |
| 21 | S | 11.4790 | 6.1069 | -3.2898 | 49 | C | 25.9492 | 8.2682 | -10.9577 | 77 | H | 3.1775  | 2.9002  | 4.3516   |
| 22 | C | 10.9910 | 6.7538 | -1.7345 | 50 | C | 23.5859 | 8.7186 | -12.3035 | 78 | H | 3.9659  | 2.3502  | 2.8744   |
| 23 | C | 12.0455 | 7.3810 | -1.1070 | 51 | C | 23.5255 | 8.1772 | -11.0059 | 79 | H | 4.0652  | 9.3122  | 0.2700   |
| 24 | C | 15.5027 | 5.7112 | -5.8205 | 52 | C | 24.7421 | 7.9640 | -10.3381 | 80 | H | 5.7169  | 8.9761  | -0.2701  |
| 25 | C | 16.1671 | 6.8879 | -5.5631 | 53 | O | 24.8863 | 9.5507 | -14.1757 | 81 | H | 12.2787 | 7.4130  | 1.0370   |
| 26 | S | 15.3460 | 7.7675 | -4.2930 | 54 | O | 24.7710 | 7.4859 | -9.0437  | 82 | H | 12.6260 | 8.9522  | 0.2334   |
| 27 | C | 14.1419 | 6.5008 | -4.1045 | 55 | C | 29.5192 | 9.8820 | -13.0951 | 83 | H | 14.1182 | 3.4253  | -5.5839  |
| 28 | C | 14.3594 | 5.4778 | -5.0101 | 56 | C | 29.3695 | 9.2612 | -14.3111 | 84 | H | 13.1650 | 3.8821  | -4.1674  |

continues

## A2<sub>1</sub> geometry continuation

|    |   |         |         |          |     |   |         |         |          |     |   |         |         |          |
|----|---|---------|---------|----------|-----|---|---------|---------|----------|-----|---|---------|---------|----------|
| 85 | H | 19.7852 | 10.5673 | -5.6516  | 97  | H | 28.8705 | 9.8911  | -10.1437 | 109 | H | 20.4929 | 10.4024 | -7.2626  |
| 86 | H | 21.1535 | 9.4861  | -5.9114  | 98  | H | 28.8398 | 11.4583 | -10.9458 | 110 | H | 6.2743  | 5.6665  | -3.9214  |
| 87 | H | 4.8505  | 6.7381  | -3.9815  | 99  | H | 24.7689 | 5.8343  | -7.8644  | 111 | H | 11.3284 | 4.3512  | -0.4137  |
| 88 | H | 5.0259  | 5.5746  | -2.6429  | 100 | H | 23.8141 | 5.6505  | -9.3587  | 112 | H | 4.3819  | 8.8000  | -1.3959  |
| 89 | H | 11.5430 | 4.1482  | 1.3439   | 101 | H | 24.0195 | 10.2087 | -15.8645 | 113 | H | 20.3987 | 5.8556  | -12.3801 |
| 90 | H | 10.0518 | 3.5623  | 0.5604   | 102 | H | 23.1200 | 8.8906  | -15.0723 | 114 | H | 27.3243 | 10.6403 | -10.5467 |
| 91 | H | 19.0183 | 6.9008  | -10.3902 | 103 | H | 31.5841 | 9.0482  | -18.4853 | 115 | H | 25.6004 | 5.6085  | -9.4275  |
| 92 | H | 20.5531 | 7.4659  | -13.0719 | 104 | H | 33.5692 | 8.6350  | -16.8148 | 116 | H | 23.0657 | 10.5470 | -14.3992 |
| 93 | H | 21.9991 | 6.4983  | -12.7669 | 105 | H | 28.2632 | 10.0793 | -16.8954 | 117 | H | 29.1662 | 10.0117 | -18.4148 |
| 94 | H | 26.8620 | 8.0686  | -10.4108 | 106 | H | 4.2066  | 4.0050  | 3.4323   | 118 | H | 28.4322 | 8.5507  | -17.7556 |
| 95 | H | 22.6568 | 8.9403  | -12.8068 | 107 | H | 10.9559 | 8.4060  | 0.4468   |     |   |         |         |          |
| 96 | H | 30.4254 | 10.4082 | -12.8213 | 108 | H | 12.6542 | 4.3880  | -5.7763  |     |   |         |         |          |

## 4) A2<sub>2</sub>

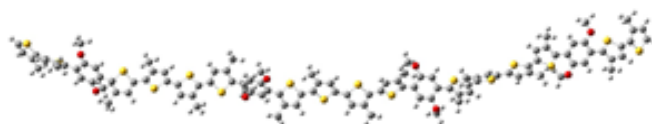

|    |   |          |         |         |    |   |          |         |         |    |   |          |         |         |
|----|---|----------|---------|---------|----|---|----------|---------|---------|----|---|----------|---------|---------|
| 1  | C | -34.7084 | 6.9874  | -0.4495 | 28 | C | -21.1405 | 2.1849  | -0.0262 | 55 | C | -5.0506  | -5.0107 | -1.1808 |
| 2  | C | -34.3877 | 6.0431  | 0.5056  | 29 | C | -16.8751 | -2.0368 | -1.1310 | 56 | C | -4.5044  | -4.7239 | 0.0490  |
| 3  | S | -35.4253 | 6.1998  | 1.9142  | 30 | C | -16.1245 | -1.3474 | -0.1954 | 57 | S | -5.7240  | -4.0282 | 1.0906  |
| 4  | C | -36.2893 | 7.5131  | 1.1955  | 31 | S | -17.0404 | -0.0011 | 0.4693  | 58 | C | -6.9512  | -4.1353 | -0.1560 |
| 5  | C | -35.7962 | 7.8181  | -0.0380 | 32 | C | -18.4355 | -0.3793 | -0.5157 | 59 | C | -6.4278  | -4.6831 | -1.3120 |
| 6  | C | -32.2889 | 2.9396  | 0.8938  | 33 | C | -18.1707 | -1.4778 | -1.2995 | 60 | C | -7.1983  | -4.9743 | -2.5735 |
| 7  | C | -31.2486 | 3.6483  | 0.3330  | 34 | C | -34.0407 | 7.1389  | -1.7905 | 61 | C | -10.6105 | -0.0886 | -1.5784 |
| 8  | S | -31.7456 | 5.2806  | -0.0711 | 35 | C | -26.4057 | 0.3751  | -3.0143 | 62 | C | -9.2067  | -5.0888 | 3.3011  |
| 9  | C | -33.3745 | 4.9989  | 0.5040  | 36 | C | -21.5049 | 3.5668  | 0.4481  | 63 | C | -1.1737  | -5.3322 | 1.6612  |
| 10 | C | -33.4796 | 3.7172  | 0.9866  | 37 | C | -16.4214 | -3.2512 | -1.8970 | 64 | C | -0.6120  | -5.1031 | 0.4269  |
| 11 | C | -27.7673 | 2.1845  | 0.6512  | 38 | C | -29.4247 | 3.5650  | 3.1290  | 65 | S | -1.8609  | -4.7024 | -0.7302 |
| 12 | C | -27.2480 | 2.3318  | -0.6427 | 39 | C | -26.7476 | 4.2820  | -3.0718 | 66 | C | -3.1284  | -4.9030 | 0.4707  |
| 13 | C | -28.0609 | 2.9767  | -1.5962 | 40 | C | -32.2279 | 1.4969  | 1.3150  | 67 | C | -2.5898  | -5.2224 | 1.7048  |
| 14 | C | -29.0427 | 2.6216  | 0.9910  | 41 | C | -12.8975 | -1.5561 | 1.7161  | 68 | C | -3.3752  | -5.4755 | 2.9644  |
| 15 | C | -29.8761 | 3.2165  | 0.0227  | 42 | C | -12.3189 | -2.0740 | 0.5726  | 69 | H | -37.1077 | 7.9764  | 1.7246  |
| 16 | C | -29.3445 | 3.3938  | -1.2625 | 43 | S | -13.4949 | -2.1864 | -0.7228 | 70 | H | -36.2012 | 8.6075  | -0.6589 |
| 17 | O | -29.4754 | 2.4118  | 2.2819  | 44 | C | -14.7787 | -1.5737 | 0.2969  | 71 | H | -34.4112 | 3.3213  | 1.3721  |
| 18 | O | -27.6346 | 3.1730  | -2.8917 | 45 | C | -14.2813 | -1.2774 | 1.5450  | 72 | H | -27.1800 | 1.6915  | 1.4167  |
| 19 | C | -24.0943 | 0.7572  | -1.9610 | 46 | C | -12.1850 | -1.2749 | 3.0140  | 73 | H | -29.9490 | 3.8449  | -2.0401 |
| 20 | C | -23.4158 | 1.3842  | -0.9411 | 47 | C | -9.0733  | -3.9094 | 1.2151  | 74 | H | -23.5935 | 0.1306  | -2.6888 |
| 21 | S | -24.5452 | 2.3035  | 0.0342  | 48 | C | -8.3065  | -3.6073 | 0.0650  | 75 | H | -18.9970 | 2.2626  | 0.4698  |
| 22 | C | -25.9026 | 1.8323  | -0.9711 | 49 | C | -8.8944  | -2.7763 | -0.8939 | 76 | H | -18.8933 | -1.8820 | -1.9978 |
| 23 | C | -25.4970 | 0.9976  | -1.9900 | 50 | C | -10.3635 | -3.4046 | 1.3524  | 77 | H | -34.7547 | 7.5090  | -2.5303 |
| 24 | C | -19.8158 | 1.6794  | 0.0665  | 51 | C | -10.9472 | -2.5724 | 0.3801  | 78 | H | -33.2123 | 7.8543  | -1.7506 |
| 25 | C | -19.6417 | 0.4118  | -0.4375 | 52 | C | -10.1827 | -2.2707 | -0.7580 | 79 | H | -33.1916 | 1.0096  | 1.1473  |
| 26 | S | -21.1680 | -0.2097 | -1.0235 | 53 | O | -8.4831  | -4.7239 | 2.1351  | 80 | H | -31.4657 | 0.9499  | 0.7584  |
| 27 | C | -22.0055 | 1.2821  | -0.6193 | 54 | O | -10.6938 | -1.5026 | -1.7840 | 81 | H | -26.4567 | 0.9824  | -3.9220 |

continues

## A<sub>2</sub> geometry continuation

|     |   |          |         |         |     |   |         |         |         |     |   |         |         |         |
|-----|---|----------|---------|---------|-----|---|---------|---------|---------|-----|---|---------|---------|---------|
| 82  | H | -26.0457 | -0.6198 | -3.2882 | 127 | C | 5.1993  | -5.6381 | 1.6283  | 172 | C | 33.2510 | 4.1886  | -0.8705 |
| 83  | H | -20.6149 | 4.1979  | 0.4940  | 128 | C | 10.6939 | -3.4930 | 1.0922  | 173 | C | 33.2433 | 5.4105  | -0.2435 |
| 84  | H | -22.2265 | 4.0474  | -0.2154 | 129 | C | 11.3298 | -3.9321 | -0.0777 | 174 | S | 31.6483 | 5.7468  | 0.3848  |
| 85  | H | -17.2836 | -3.8409 | -2.2157 | 130 | C | 10.5456 | -4.6336 | -1.0153 | 175 | C | 31.0168 | 4.2236  | -0.2090 |
| 86  | H | -15.8615 | -2.9758 | -2.7968 | 131 | C | 9.3531  | -3.7560 | 1.3492  | 176 | C | 32.0012 | 3.5070  | -0.8609 |
| 87  | H | -29.7737 | 3.2404  | 4.1088  | 132 | C | 8.5835  | -4.5050 | 0.4363  | 177 | C | 31.8375 | 2.1346  | -1.4604 |
| 88  | H | -30.0753 | 4.3620  | 2.7568  | 133 | C | 9.2108  | -4.9160 | -0.7485 | 178 | C | 26.1286 | 3.5621  | -2.9357 |
| 89  | H | -26.5169 | 4.3198  | -4.1361 | 134 | O | 8.8210  | -3.3028 | 2.5363  | 179 | C | 29.0149 | 4.4864  | 3.5139  |
| 90  | H | -27.2308 | 5.2182  | -2.7709 | 135 | O | 11.0810 | -5.0988 | -2.1966 | 180 | C | 35.8894 | 7.9319  | 0.6245  |
| 91  | H | -14.9000 | -0.8729 | 2.3366  | 136 | C | 15.0292 | -3.8429 | -0.7621 | 181 | C | 36.3648 | 7.7350  | -0.6374 |
| 92  | H | -12.3762 | -2.0563 | 3.7580  | 137 | C | 14.9853 | -2.4850 | -0.5423 | 182 | S | 35.3984 | 6.5938  | -1.5049 |
| 93  | H | -11.1058 | -1.2021 | 2.8771  | 138 | S | 13.3454 | -2.0100 | -0.1456 | 183 | C | 34.3405 | 6.3589  | -0.1224 |
| 94  | H | -8.3352  | -2.4980 | -1.7778 | 139 | C | 12.7577 | -3.6548 | -0.3032 | 184 | C | 34.7323 | 7.1532  | 0.9370  |
| 95  | H | -10.9613 | -3.6838 | 2.2074  | 140 | C | 13.7828 | -4.5169 | -0.6282 | 185 | C | 34.0699 | 7.2009  | 2.2884  |
| 96  | H | -4.4822  | -5.4849 | -1.9713 | 141 | C | 17.4609 | 0.3238  | -0.7546 | 186 | H | 0.7116  | -5.4445 | -2.1013 |
| 97  | H | -7.0247  | -4.2097 | -3.3385 | 142 | C | 18.4243 | -0.5894 | -0.3954 | 187 | H | 4.5842  | -6.1318 | 2.3705  |
| 98  | H | -6.8818  | -5.9311 | -2.9971 | 143 | S | 17.6888 | -2.1521 | -0.1197 | 188 | H | 11.2572 | -2.9528 | 1.8437  |
| 99  | H | -11.0345 | 0.3769  | -2.4676 | 144 | C | 16.0933 | -1.5498 | -0.5466 | 189 | H | 8.6598  | -5.4962 | -1.4789 |
| 100 | H | -11.1845 | 0.2194  | -0.6987 | 145 | C | 16.1426 | -0.1989 | -0.8435 | 190 | H | 15.9465 | -4.3572 | -1.0213 |
| 101 | H | -8.5367  | -5.7261 | 3.8756  | 146 | C | 22.1589 | -0.8149 | -0.0319 | 191 | H | 17.6952 | 1.3550  | -0.9886 |
| 102 | H | -9.4742  | -4.2114 | 3.9002  | 147 | C | 22.1600 | 0.5625  | 0.0958  | 192 | H | 20.6581 | -2.3954 | -0.3464 |
| 103 | H | -0.5839  | -5.6152 | 2.5244  | 148 | S | 20.5253 | 1.2009  | -0.0198 | 193 | H | 2.8827  | -6.0433 | -3.2734 |
| 104 | H | -4.3298  | -5.9619 | 2.7560  | 149 | C | 19.8470 | -0.3970 | -0.2348 | 194 | H | 3.8148  | -4.5773 | -2.9763 |
| 105 | H | -33.6385 | 6.1915  | -2.1521 | 150 | C | 20.8504 | -1.3372 | -0.2187 | 195 | H | 6.8785  | -6.8368 | 3.4064  |
| 106 | H | -27.4247 | 0.2789  | -2.6373 | 151 | C | 3.5061  | -5.5316 | -2.5370 | 196 | H | 8.3873  | -6.1676 | 2.7669  |
| 107 | H | -21.9447 | 3.5476  | 1.4507  | 152 | C | 13.6427 | -6.0044 | -0.8024 | 197 | H | 13.4819 | -6.2684 | -1.8510 |
| 108 | H | -15.7755 | -3.8928 | -1.2951 | 153 | C | 14.9703 | 0.6526  | -1.2531 | 198 | H | 14.5448 | -6.5147 | -0.4557 |
| 109 | H | -28.3982 | 3.9387  | 3.2142  | 154 | C | 23.3741 | -1.7021 | 0.0272  | 199 | H | 15.3156 | 1.5383  | -1.7904 |
| 110 | H | -25.8221 | 4.1483  | -2.5039 | 155 | C | 8.0292  | -2.1148 | 2.4259  | 200 | H | 14.2808 | 0.1102  | -1.9031 |
| 111 | H | -31.9775 | 1.4034  | 2.3751  | 156 | C | 11.2095 | -4.1138 | -3.2273 | 201 | H | 23.0913 | -2.7104 | 0.3374  |
| 112 | H | -12.5376 | -0.3328 | 3.4421  | 157 | C | 7.3480  | -5.9359 | 3.0035  | 202 | H | 23.8627 | -1.7841 | -0.9492 |
| 113 | H | -8.2722  | -5.0225 | -2.3917 | 158 | C | 24.4235 | 3.4287  | 0.9759  | 203 | H | 7.6989  | -1.8723 | 3.4355  |
| 114 | H | -9.5672  | 0.2254  | -1.4628 | 159 | C | 25.4269 | 2.7740  | 0.2868  | 204 | H | 7.1561  | -2.2758 | 1.7865  |
| 115 | H | -10.1136 | -5.6502 | 3.0511  | 160 | S | 24.8400 | 1.2617  | -0.3778 | 205 | H | 11.6256 | -4.6287 | -4.0929 |
| 116 | H | -2.8070  | -6.1166 | 3.6420  | 161 | C | 23.2496 | 1.4954  | 0.3142  | 206 | H | 10.2311 | -3.6955 | -3.4886 |
| 117 | H | -3.5921  | -4.5446 | 3.4986  | 162 | C | 23.2034 | 2.6982  | 0.9806  | 207 | H | 22.3091 | 3.0536  | 1.4776  |
| 118 | C | 2.7417   | -5.3318 | -1.2551 | 163 | C | 24.5465 | 4.7745  | 1.6427  | 208 | H | 24.6721 | 4.6787  | 2.7270  |
| 119 | C | 3.3019   | -5.1909 | 0.0023  | 164 | C | 28.9058 | 3.9686  | 1.1735  | 209 | H | 25.3943 | 5.3421  | 1.2580  |
| 120 | S | 2.0531   | -4.9901 | 1.2230  | 165 | C | 29.5929 | 3.8819  | -0.0600 | 210 | H | 29.3445 | 3.3776  | -2.1358 |
| 121 | C | 0.7779   | -5.1508 | 0.0370  | 166 | C | 28.8645 | 3.4372  | -1.1674 | 211 | H | 27.0621 | 3.6224  | 2.2140  |
| 122 | C | 1.3215   | -5.3081 | -1.2167 | 167 | C | 27.5649 | 3.6035  | 1.2583  | 212 | H | 34.1488 | 3.7662  | -1.3048 |
| 123 | C | 6.6013   | -5.4530 | 1.7903  | 168 | C | 26.8413 | 3.1550  | 0.1385  | 213 | H | 31.7338 | 2.1801  | -2.5500 |
| 124 | C | 7.1750   | -4.8421 | 0.6955  | 169 | C | 27.5249 | 3.0721  | -1.0847 | 214 | H | 32.7166 | 1.5208  | -1.2462 |
| 125 | S | 5.9722   | -4.4919 | -0.5315 | 170 | O | 29.6370 | 4.3981  | 2.2408  | 215 | H | 25.7207 | 3.0477  | -3.8052 |
| 126 | C | 4.6865   | -5.1890 | 0.4329  | 171 | O | 26.9064 | 2.5955  | -2.2223 | 216 | H | 25.3069 | 3.9428  | -2.3207 |

continues

## A<sub>2</sub> geometry continuation

|     |   |         |         |         |     |   |         |         |         |     |   |         |        |         |
|-----|---|---------|---------|---------|-----|---|---------|---------|---------|-----|---|---------|--------|---------|
| 217 | H | 29.7832 | 4.8538  | 4.1920  | 223 | H | 12.7920 | -6.3933 | -0.2415 | 229 | H | 23.6402 | 5.3629 | 1.4766  |
| 218 | H | 28.1746 | 5.1896  | 3.5039  | 224 | H | 14.3983 | 0.9981  | -0.3856 | 230 | H | 30.9608 | 1.6206 | -1.0656 |
| 219 | H | 36.3543 | 8.6053  | 1.3340  | 225 | H | 24.1171 | -1.3261 | 0.7327  | 231 | H | 26.7561 | 4.3976 | -3.2654 |
| 220 | H | 37.2230 | 8.1875  | -1.1099 | 226 | H | 8.6265  | -1.2861 | 2.0299  | 232 | H | 28.6664 | 3.5068 | 3.8593  |
| 221 | H | 33.5821 | 6.2565  | 2.5337  | 227 | H | 11.8840 | -3.3069 | -2.9255 | 233 | H | 34.8080 | 7.4154 | 3.0652  |
| 222 | H | 4.4074  | -6.1278 | -2.3834 | 228 | H | 7.3615  | -5.1761 | 3.7893  | 234 | H | 33.3077 | 7.9861 | 2.3363  |

## 5) A<sub>3</sub><sub>1</sub>

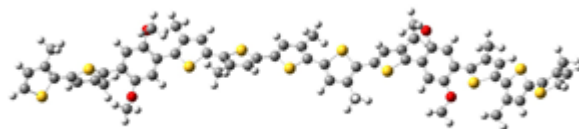

|    |   |          |         |         |    |   |          |         |          |    |   |          |         |          |
|----|---|----------|---------|---------|----|---|----------|---------|----------|----|---|----------|---------|----------|
| 1  | C | -11.6507 | -4.7027 | 9.5069  | 33 | C | 2.7292   | 2.5926  | 0.2481   | 65 | C | 14.2796  | 3.8108  | -11.5636 |
| 2  | C | -11.8531 | -3.5806 | 8.7279  | 34 | C | -10.3197 | -5.1846 | 10.0200  | 66 | C | 14.9072  | 4.7336  | -10.5514 |
| 3  | S | -13.5592 | -3.3670 | 8.3690  | 35 | C | -9.9312  | 0.9319  | 7.3379   | 67 | C | 11.8909  | 1.7986  | -6.1782  |
| 4  | C | -13.9805 | -4.7705 | 9.2857  | 36 | C | -2.6137  | 0.7811  | 6.7565   | 68 | C | 8.9079   | 4.1538  | -12.1453 |
| 5  | C | -12.8766 | -5.3696 | 9.8151  | 37 | C | -1.7909  | -1.7825 | 0.5181   | 69 | C | 14.7946  | 1.2335  | -17.0359 |
| 6  | C | -9.9717  | -0.5648 | 7.4816  | 38 | C | 4.7336   | 4.1085  | -0.2440  | 70 | C | 16.1125  | 1.0668  | -16.6815 |
| 7  | C | -8.9688  | -1.4276 | 7.0956  | 39 | C | -9.3993  | -0.7882 | 3.8444   | 71 | S | 16.3428  | 1.5646  | -15.0204 |
| 8  | S | -9.3788  | -3.0858 | 7.4917  | 40 | C | -3.5543  | -3.0215 | 6.4862   | 72 | C | 14.6605  | 2.0371  | -14.8552 |
| 9  | C | -10.9069 | -2.6095 | 8.2001  | 41 | C | 4.7933   | 2.9890  | -5.4544  | 73 | C | 13.9620  | 1.7794  | -16.0207 |
| 10 | C | -11.0592 | -1.2481 | 8.0994  | 42 | C | 6.0376   | 3.2730  | -4.9190  | 74 | C | 12.5023  | 2.0701  | -16.2501 |
| 11 | C | -6.3196  | -0.0862 | 4.7406  | 43 | S | 5.9946   | 3.1897  | -3.1664  | 75 | C | 19.2260  | 0.0213  | -18.5016 |
| 12 | C | -5.1280  | -0.5479 | 5.3171  | 44 | C | 4.2832   | 2.8189  | -3.1552  | 76 | C | 18.4498  | -0.9243 | -19.1024 |
| 13 | C | -5.2361  | -1.3551 | 6.4671  | 45 | C | 3.8218   | 2.7368  | -4.4504  | 77 | S | 16.8186  | -0.8565 | -18.5344 |
| 14 | C | -7.5658  | -0.3764 | 5.2848  | 46 | C | 4.4524   | 2.9833  | -6.9211  | 78 | C | 17.1871  | 0.4983  | -17.4781 |
| 15 | C | -7.6703  | -1.1385 | 6.4656  | 47 | C | 9.4298   | 4.5639  | -5.9112  | 79 | C | 18.5215  | 0.8444  | -17.5700 |
| 16 | C | -6.4807  | -1.6273 | 7.0236  | 48 | C | 9.3257   | 3.7905  | -7.0480  | 80 | C | 19.1898  | 1.9671  | -16.8215 |
| 17 | O | -8.6801  | 0.1415  | 4.6621  | 49 | S | 7.7999   | 2.9255  | -7.0812  | 81 | H | -15.0143 | -5.0650 | 9.3800   |
| 18 | O | -4.1209  | -1.8593 | 7.1003  | 50 | C | 7.2912   | 3.6255  | -5.5579  | 82 | H | -12.9233 | -6.2612 | 10.4278  |
| 19 | C | -1.6462  | 0.5380  | 4.3893  | 51 | C | 8.2784   | 4.4570  | -5.0811  | 83 | H | -11.9263 | -0.7344 | 8.4962   |
| 20 | C | -1.9152  | 0.1254  | 3.1043  | 52 | C | 10.5839  | 5.4714  | -5.5844  | 84 | H | -6.2858  | 0.5411  | 3.8579   |
| 21 | S | -3.5521  | -0.4950 | 3.0196  | 53 | C | 10.6690  | 3.6864  | -10.5849 | 85 | H | -6.5117  | -2.2160 | 7.9326   |
| 22 | C | -3.8255  | -0.1989 | 4.7263  | 54 | C | 12.0395  | 3.3904  | -10.3868 | 86 | H | -0.6895  | 0.9592  | 4.6729   |
| 23 | C | -2.7137  | 0.3641  | 5.3148  | 55 | C | 12.4676  | 3.1957  | -9.0703  | 87 | H | 0.3002   | -0.6312 | -0.9949  |
| 24 | C | 0.0588   | -0.1131 | -0.0749 | 56 | C | 9.8129   | 3.8098  | -9.4949  | 88 | H | 2.6990   | 2.8866  | 1.2901   |
| 25 | C | 0.7465   | 1.0002  | 0.3487  | 57 | C | 10.2616  | 3.6397  | -8.1726  | 89 | H | -10.4424 | -5.6817 | 10.9853  |
| 26 | S | 0.1027   | 1.5495  | 1.8797  | 58 | C | 11.6122  | 3.3107  | -7.9781  | 90 | H | -9.8613  | -5.9077 | 9.3368   |
| 27 | C | -1.0554  | 0.2284  | 1.9412  | 59 | O | 10.2709  | 3.8578  | -11.8765 | 91 | H | -8.9059  | 1.3031  | 7.3096   |
| 28 | C | -0.9599  | -0.5608 | 0.8083  | 60 | O | 12.1333  | 3.1023  | -6.7178  | 92 | H | -2.1788  | -0.0121 | 7.3704   |
| 29 | C | 3.6945   | 3.1015  | -0.6609 | 61 | C | 14.9577  | 3.4312  | -12.7546 | 93 | H | -1.9865  | 1.6709  | 6.8529   |
| 30 | C | 3.5446   | 2.5763  | -1.9333 | 62 | C | 14.2320  | 2.6220  | -13.5972 | 94 | H | -1.2755  | -2.4300 | -0.1943  |
| 31 | S | 2.1992   | 1.4448  | -1.9857 | 63 | S | 12.6549  | 2.3136  | -12.9104 | 95 | H | -1.9894  | -2.3632 | 1.4209   |
| 32 | C | 1.8402   | 1.6922  | -0.2916 | 64 | C | 13.0042  | 3.2833  | -11.4925 | 96 | H | 4.4050   | 4.6417  | 0.6504   |

continues

### A3<sub>1</sub> geometry continuation

|     |   |          |         |          |     |   |          |         |          |     |   |          |         |          |
|-----|---|----------|---------|----------|-----|---|----------|---------|----------|-----|---|----------|---------|----------|
| 97  | H | 5.6899   | 3.6302  | -0.0076  | 111 | H | 15.4786  | 5.5165  | -11.0571 | 125 | H | -10.4133 | 1.2546  | 6.4112   |
| 98  | H | -10.2305 | -0.2338 | 3.4096   | 112 | H | 12.3750  | 1.7751  | -5.2021  | 126 | H | -3.5952  | 1.0068  | 7.1753   |
| 99  | H | -9.7884  | -1.6219 | 4.4364   | 113 | H | 10.8197  | 1.6109  | -6.0572  | 127 | H | -2.7590  | -1.5184 | 0.0796   |
| 100 | H | -2.7032  | -3.3095 | 7.1027   | 114 | H | 8.8313   | 4.2280  | -13.2286 | 128 | H | 4.9216   | 4.8456  | -1.0270  |
| 101 | H | -4.2807  | -3.8414 | 6.4630   | 115 | H | 8.2456   | 3.3578  | -11.7879 | 129 | H | -8.7606  | -1.1741 | 3.0421   |
| 102 | H | 2.7837   | 2.5323  | -4.6818  | 116 | H | 14.4306  | 0.9992  | -18.0286 | 130 | H | -3.2107  | -2.8077 | 5.4696   |
| 103 | H | 5.0045   | 3.7498  | -7.4682  | 117 | H | 12.1779  | 2.9638  | -15.7141 | 131 | H | 3.3853   | 3.1675  | -7.0628  |
| 104 | H | 4.6829   | 2.0188  | -7.3858  | 118 | H | 12.3093  | 2.2221  | -17.3144 | 132 | H | 11.0848  | 5.8200  | -6.4888  |
| 105 | H | 8.1661   | 5.0172  | -4.1610  | 119 | H | 20.2787  | 0.1496  | -18.7206 | 133 | H | 14.1590  | 5.2138  | -9.9204  |
| 106 | H | 10.2373  | 6.3437  | -5.0248  | 120 | H | 18.7346  | -1.6552 | -19.8434 | 134 | H | 12.3276  | 1.0248  | -6.8193  |
| 107 | H | 13.4971  | 2.9233  | -8.8761  | 121 | H | 19.5941  | 1.6288  | -15.8614 | 135 | H | 8.6085   | 5.1068  | -11.6955 |
| 108 | H | 8.7773   | 4.0794  | -9.6477  | 122 | H | 20.0240  | 2.3667  | -17.4031 | 136 | H | 11.8688  | 1.2412  | -15.9173 |
| 109 | H | 15.9533  | 3.7796  | -13.0001 | 123 | H | -9.6138  | -4.3629 | 10.1494  | 137 | H | 18.4980  | 2.7853  | -16.6152 |
| 110 | H | 15.6028  | 4.1998  | -9.8946  | 124 | H | -10.4464 | 1.4094  | 8.1751   | 138 | H | 11.3366  | 4.9542  | -4.9837  |

### 6) A3<sub>2</sub>

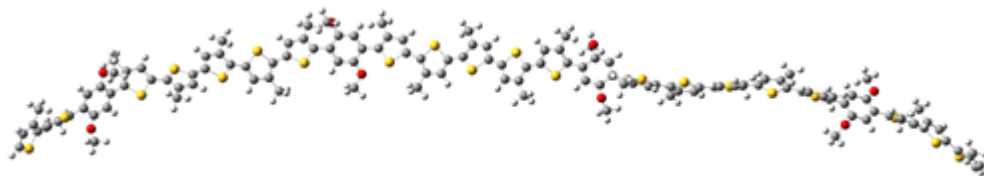

|    |   |          |         |         |    |   |          |         |         |    |   |         |         |         |
|----|---|----------|---------|---------|----|---|----------|---------|---------|----|---|---------|---------|---------|
| 1  | C | -19.8675 | 4.7285  | -1.3550 | 24 | C | -4.5908  | 0.7426  | -0.4915 | 47 | C | 6.3853  | -4.0687 | -0.1871 |
| 2  | C | -19.3853 | 4.2606  | -0.1486 | 25 | C | -4.3489  | -0.6113 | -0.4886 | 48 | C | 7.0770  | -2.9087 | 0.0907  |
| 3  | S | -20.3043 | 4.9246  | 1.1930  | 26 | S | -5.8589  | -1.4852 | -0.6139 | 49 | S | 5.9799  | -1.6172 | 0.5445  |
| 4  | C | -21.3360 | 5.8021  | 0.1189  | 27 | C | -6.7876  | 0.0037  | -0.7184 | 50 | C | 4.5785  | -2.6549 | 0.3748  |
| 5  | C | -20.9809 | 5.6077  | -1.1825 | 28 | C | -5.9580  | 1.1071  | -0.6187 | 51 | C | 4.9802  | -3.9084 | -0.0262 |
| 6  | C | -17.0062 | 1.6629  | 1.1857  | 29 | C | -1.4471  | -2.9998 | -0.5019 | 52 | C | 7.0139  | -5.3831 | -0.5606 |
| 7  | C | -16.0825 | 2.1325  | 0.2771  | 30 | C | -0.6805  | -1.9618 | 0.0000  | 53 | C | 10.5127 | -1.8191 | 1.2448  |
| 8  | S | -16.7489 | 3.4449  | -0.6758 | 31 | S | -1.6508  | -0.5079 | 0.1944  | 54 | C | 11.3328 | -2.1623 | 0.1426  |
| 9  | C | -18.2916 | 3.3471  | 0.1451  | 32 | C | -3.0888  | -1.3105 | -0.3956 | 55 | C | 10.7021 | -2.7165 | -0.9754 |
| 10 | C | -18.2455 | 2.3614  | 1.1007  | 33 | C | -2.7970  | -2.6152 | -0.7189 | 56 | C | 9.1442  | -2.0678 | 1.2058  |
| 11 | C | -12.4747 | 1.0701  | 0.7450  | 34 | C | -19.3358 | 4.3578  | -2.7140 | 57 | C | 8.5251  | -2.6520 | 0.0859  |
| 12 | C | -12.0841 | 0.7136  | -0.5534 | 35 | C | -16.7872 | 0.5121  | 2.1291  | 58 | C | 9.3322  | -2.9594 | -1.0206 |
| 13 | C | -13.0293 | 0.8882  | -1.5839 | 36 | C | -11.2811 | -1.9839 | -2.0514 | 59 | O | 11.1459 | -1.2671 | 2.3174  |
| 14 | C | -13.7487 | 1.5491  | 1.0292  | 37 | C | -6.4014  | 2.5452  | -0.6705 | 60 | O | 8.8059  | -3.5124 | -2.1698 |
| 15 | C | -14.7108 | 1.6721  | 0.0069  | 38 | C | -0.9568  | -4.3949 | -0.7863 | 61 | C | 15.0698 | -2.2623 | -0.2409 |
| 16 | C | -14.3101 | 1.3460  | -1.2964 | 39 | C | -14.0167 | 3.2478  | 2.6566  | 62 | C | 15.1107 | -0.9695 | 0.2278  |
| 17 | O | -14.0484 | 1.8519  | 2.3392  | 40 | C | -11.9720 | 1.5592  | -3.5929 | 63 | S | 13.4947 | -0.4283 | 0.6154  |
| 18 | O | -12.7347 | 0.5712  | -2.8921 | 41 | C | 2.7088   | -1.2458 | 1.4586  | 64 | C | 12.7898 | -1.9592 | 0.1338  |
| 19 | C | -8.9301  | -1.1077 | -1.5013 | 42 | C | 3.2243   | -2.1733 | 0.5698  | 65 | C | 13.7689 | -2.8327 | -0.3009 |
| 20 | C | -8.2238  | -0.0961 | -0.8914 | 43 | S | 1.9521   | -2.8447 | -0.4360 | 66 | C | 13.5444 | -4.2553 | -0.7435 |
| 21 | S | -9.3412  | 1.0819  | -0.2316 | 44 | C | 0.7165   | -1.9082 | 0.3781  | 67 | C | 8.2012  | -2.5716 | -3.0634 |
| 22 | C | -10.7336 | 0.1872  | -0.8113 | 45 | C | 1.3010   | -1.1101 | 1.3366  | 68 | C | 10.3805 | -0.8966 | 3.4553  |
| 23 | C | -10.3456 | -0.9640 | -1.4622 | 46 | C | 3.5027   | -0.4811 | 2.4845  | 69 | C | 17.8601 | 1.4343  | 1.0759  |

continues



## A<sub>3</sub><sub>2</sub> geometry continuation

|     |   |          |         |         |     |   |          |         |         |     |   |         |         |         |
|-----|---|----------|---------|---------|-----|---|----------|---------|---------|-----|---|---------|---------|---------|
| 70  | C | 18.5463  | 0.9319  | -0.0077 | 115 | H | 9.6239   | -0.1456 | 3.2035  | 160 | C | 33.3625 | 11.1745 | -3.4098 |
| 71  | S | 17.5665  | -0.2768 | -0.8113 | 116 | H | 18.2848  | 2.1853  | 1.7304  | 161 | C | 39.0197 | 10.7108 | -1.2299 |
| 72  | C | 16.2719  | -0.1099 | 0.3620  | 117 | H | 15.1573  | 0.4120  | 2.8648  | 162 | C | 39.3372 | 11.5090 | -2.3039 |
| 73  | C | 16.5806  | 0.8608  | 1.2989  | 118 | H | 16.3255  | 1.6782  | 3.2655  | 163 | S | 37.9194 | 11.7612 | -3.2968 |
| 74  | C | 15.7132  | 1.2610  | 2.4630  | 119 | H | 22.8511  | 1.0423  | -1.9379 | 164 | C | 36.9094 | 10.8196 | -2.2088 |
| 75  | C | 21.9682  | 1.4375  | -1.4505 | 120 | H | 20.2078  | -0.9576 | -2.5030 | 165 | C | 37.6578 | 10.3121 | -1.1610 |
| 76  | C | 21.8886  | 2.7372  | -1.0070 | 121 | H | 21.7574  | -1.2185 | -1.7048 | 166 | C | 42.2446 | 13.4757 | -3.6472 |
| 77  | S | 20.3354  | 3.0129  | -0.2506 | 122 | H | -18.8880 | 3.3630  | -2.7163 | 167 | C | 43.0592 | 12.6684 | -2.8717 |
| 78  | C | 19.8418  | 1.3448  | -0.5054 | 123 | H | -17.7179 | -0.0410 | 2.2783  | 168 | S | 42.1028 | 11.4964 | -1.9746 |
| 79  | C | 20.8251  | 0.6396  | -1.1788 | 124 | H | -16.4363 | 0.8600  | 3.1044  | 169 | C | 40.6081 | 12.0970 | -2.6567 |
| 80  | C | 20.7528  | -0.8142 | -1.5641 | 125 | H | -12.2518 | -1.9685 | -1.5543 | 170 | C | 40.8709 | 13.1409 | -3.5129 |
| 81  | H | -22.1407 | 6.4036  | 0.5126  | 126 | H | -6.7576  | 2.8941  | 0.3044  | 171 | C | 24.2584 | 7.1480  | -0.0876 |
| 82  | H | -21.5042 | 6.0642  | -2.0135 | 127 | H | -0.2324  | -4.7302 | -0.0417 | 172 | C | 28.2369 | 6.0531  | -5.4340 |
| 83  | H | -19.1030 | 2.1132  | 1.7141  | 128 | H | -13.0206 | 3.6649  | 2.4720  | 173 | C | 32.3598 | 12.0078 | -4.1599 |
| 84  | H | -11.7830 | 0.9494  | 1.5702  | 129 | H | -10.9932 | 1.7106  | -3.1280 | 174 | C | 37.1285 | 9.4626  | -0.0360 |
| 85  | H | -15.0163 | 1.4229  | -2.1144 | 130 | H | 2.8563   | -0.1680 | 3.3072  | 175 | C | 42.7137 | 14.5820 | -4.5548 |
| 86  | H | -8.4410  | -1.9481 | -1.9784 | 131 | H | 8.0222   | -5.4724 | -0.1535 | 176 | C | 30.8521 | 4.7314  | -2.8192 |
| 87  | H | -3.7955  | 1.4759  | -0.4383 | 132 | H | 12.5939  | -4.6481 | -0.3818 | 177 | C | 31.0059 | 11.1360 | -0.5808 |
| 88  | H | -3.5398  | -3.2961 | -1.1160 | 133 | H | 8.9307   | -1.8233 | -3.3927 | 178 | C | 46.6784 | 11.8485 | -2.2737 |
| 89  | H | -20.1411 | 4.3691  | -3.4526 | 134 | H | 9.8940   | -1.7658 | 3.9113  | 179 | C | 46.9562 | 13.1892 | -2.4753 |
| 90  | H | -18.5710 | 5.0638  | -3.0548 | 135 | H | 14.9821  | 2.0246  | 2.1773  | 180 | S | 45.4841 | 14.0877 | -2.8006 |
| 91  | H | -16.0347 | -0.1795 | 1.7481  | 136 | H | 20.2512  | -1.4122 | -0.8009 | 181 | C | 44.4986 | 12.6430 | -2.7123 |
| 92  | H | -11.4619 | -1.7914 | -3.1122 | 137 | H | 7.0989   | -5.4874 | -1.6454 | 182 | C | 45.2949 | 11.5605 | -2.4104 |
| 93  | H | -10.8608 | -2.9879 | -1.9527 | 138 | C | 24.0347  | 5.8115  | -0.7445 | 183 | C | 47.6970 | 10.7770 | -1.9874 |
| 94  | H | -5.5681  | 3.1876  | -0.9628 | 139 | C | 24.8243  | 5.2602  | -1.7379 | 184 | C | 49.8530 | 15.5417 | -2.9584 |
| 95  | H | -7.2117  | 2.6955  | -1.3866 | 140 | S | 24.1987  | 3.6941  | -2.2352 | 185 | C | 50.5113 | 14.8385 | -1.9719 |
| 96  | H | -1.7933  | -5.0968 | -0.7842 | 141 | C | 22.8682  | 3.7937  | -1.1036 | 186 | S | 49.5202 | 13.5211 | -1.3723 |
| 97  | H | -0.4743  | -4.4632 | -1.7670 | 142 | C | 22.9409  | 4.9731  | -0.3993 | 187 | C | 48.2141 | 13.9118 | -2.4727 |
| 98  | H | -14.2502 | 3.3256  | 3.7180  | 143 | C | 27.6655  | 6.1316  | -4.0448 | 188 | C | 48.5599 | 15.0100 | -3.2259 |
| 99  | H | -14.7603 | 3.8049  | 2.0789  | 144 | C | 28.2366  | 6.8084  | -2.9880 | 189 | C | 50.4270 | 16.7023 | -3.7238 |
| 100 | H | -11.8369 | 1.1804  | -4.6057 | 145 | S | 27.2253  | 6.7121  | -1.5591 | 190 | C | 54.0463 | 14.0853 | -0.8491 |
| 101 | H | -12.5118 | 2.5120  | -3.6300 | 146 | C | 26.0135  | 5.7642  | -2.3973 | 191 | C | 54.5012 | 15.3460 | -0.3924 |
| 102 | H | 0.7208   | -0.4560 | 1.9756  | 147 | C | 26.4160  | 5.5465  | -3.6949 | 192 | C | 53.5941 | 16.4087 | -0.4402 |
| 103 | H | 4.3134   | -1.0826 | 2.9002  | 148 | C | 31.8770  | 7.8086  | -3.3155 | 193 | C | 52.7571 | 13.9449 | -1.3536 |
| 104 | H | 3.9506   | 0.4224  | 2.0577  | 149 | C | 31.8776  | 9.1355  | -2.8624 | 194 | C | 51.8623 | 15.0281 | -1.4222 |
| 105 | H | 4.2783   | -4.7208 | -0.1693 | 150 | C | 30.6549  | 9.6607  | -2.3984 | 195 | C | 52.3012 | 16.2700 | -0.9372 |
| 106 | H | 6.4147   | -6.2145 | -0.1812 | 151 | C | 30.7211  | 7.0365  | -3.3429 | 196 | O | 54.9422 | 13.0611 | -0.7806 |
| 107 | H | 11.2838  | -2.9521 | -1.8573 | 152 | C | 29.4880  | 7.5801  | -2.9303 | 197 | O | 51.4832 | 17.3810 | -0.9440 |
| 108 | H | 8.5288   | -1.8451 | 2.0660  | 153 | C | 29.4948  | 8.8963  | -2.4468 | 198 | C | 57.9271 | 16.5472 | 0.5798  |
| 109 | H | 15.9646  | -2.8116 | -0.5064 | 154 | O | 30.8138  | 5.7495  | -3.8253 | 199 | C | 58.0148 | 15.4742 | 1.4355  |
| 110 | H | 13.5469  | -4.3441 | -1.8354 | 155 | O | 30.5588  | 10.9521 | -1.9281 | 200 | S | 56.5650 | 14.5051 | 1.3218  |
| 111 | H | 14.3438  | -4.8988 | -0.3664 | 156 | C | 34.7060  | 11.5949 | -3.1996 | 201 | C | 55.8626 | 15.5694 | 0.1190  |
| 112 | H | 7.8560   | -3.1436 | -3.9245 | 157 | C | 35.4978  | 10.6996 | -2.5173 | 202 | C | 56.7192 | 16.6153 | -0.1677 |
| 113 | H | 7.3489   | -2.0694 | -2.5955 | 158 | S | 34.5597  | 9.2732  | -2.1211 | 203 | C | 56.4753 | 17.6975 | -1.1872 |
| 114 | H | 11.0910  | -0.4709 | 4.1617  | 159 | C | 33.1170  | 9.9295  | -2.8717 | 204 | C | 50.5581 | 17.4495 | 0.1463  |

continues

### A<sub>3</sub><sub>2</sub> geometry continuation

|     |   |         |         |         |     |   |         |         |         |     |   |         |         |         |
|-----|---|---------|---------|---------|-----|---|---------|---------|---------|-----|---|---------|---------|---------|
| 205 | C | 54.5481 | 11.7688 | -1.2192 | 229 | H | 32.8545 | 12.5807 | -4.9482 | 253 | H | 58.7857 | 12.6117 | 1.2667  |
| 206 | C | 60.7078 | 14.0954 | 3.6527  | 230 | H | 37.7912 | 9.5256  | 0.8295  | 254 | H | 59.9464 | 11.8586 | 2.3685  |
| 207 | C | 61.0440 | 15.3965 | 3.9427  | 231 | H | 36.1315 | 9.7782  | 0.2777  | 255 | H | 64.5674 | 17.8166 | 5.9642  |
| 208 | S | 59.9504 | 16.4848 | 3.1182  | 232 | H | 41.9658 | 14.7811 | -5.3251 | 256 | H | 64.1848 | 15.8887 | 7.7077  |
| 209 | C | 59.0920 | 15.1570 | 2.3561  | 233 | H | 42.8754 | 15.5157 | -4.0060 | 257 | H | 62.3115 | 18.7851 | 3.7737  |
| 210 | C | 59.6115 | 13.9407 | 2.7605  | 234 | H | 30.9447 | 3.7828  | -3.3472 | 258 | H | 63.9910 | 18.3322 | 3.4902  |
| 211 | C | 59.1362 | 12.5880 | 2.3000  | 235 | H | 29.9357 | 4.7271  | -2.2215 | 259 | H | 24.6607 | 7.8817  | -0.7884 |
| 212 | C | 63.8166 | 17.0422 | 5.8674  | 236 | H | 30.8533 | 12.1896 | -0.3484 | 260 | H | 27.4343 | 6.0260  | -6.1752 |
| 213 | C | 63.6431 | 16.0533 | 6.7891  | 237 | H | 30.4177 | 10.5223 | 0.1105  | 261 | H | 28.8502 | 5.1570  | -5.5606 |
| 214 | S | 62.3688 | 14.9790 | 6.3304  | 238 | H | 44.8967 | 10.5573 | -2.3223 | 262 | H | 31.5897 | 11.3870 | -4.6195 |
| 215 | C | 62.0794 | 15.8720 | 4.8452  | 239 | H | 48.6362 | 10.9603 | -2.5128 | 263 | H | 37.0627 | 8.4076  | -0.3220 |
| 216 | C | 62.9318 | 16.9551 | 4.7489  | 240 | H | 47.9264 | 10.7128 | -0.9186 | 264 | H | 43.6519 | 14.3286 | -5.0521 |
| 217 | C | 62.9801 | 17.9340 | 3.6057  | 241 | H | 47.9085 | 15.4125 | -3.9918 | 265 | H | 31.7183 | 4.8678  | -2.1622 |
| 218 | H | 22.2208 | 5.2396  | 0.3646  | 242 | H | 50.0380 | 16.7163 | -4.7450 | 266 | H | 32.0670 | 10.8907 | -0.4760 |
| 219 | H | 25.8043 | 5.0043  | -4.4055 | 243 | H | 53.8853 | 17.3795 | -0.0600 | 267 | H | 47.3184 | 9.8013  | -2.2994 |
| 220 | H | 32.7928 | 7.3630  | -3.6852 | 244 | H | 52.4284 | 12.9910 | -1.7415 | 268 | H | 51.5156 | 16.6486 | -3.7714 |
| 221 | H | 28.5702 | 9.3573  | -2.1207 | 245 | H | 58.7325 | 17.2613 | 0.4609  | 269 | H | 55.7132 | 17.4091 | -1.9115 |
| 222 | H | 35.0803 | 12.5503 | -3.5462 | 246 | H | 56.1491 | 18.6308 | -0.7153 | 270 | H | 51.0875 | 17.4668 | 1.1054  |
| 223 | H | 39.7451 | 10.4374 | -0.4734 | 247 | H | 57.3969 | 17.9175 | -1.7325 | 271 | H | 54.2948 | 11.7673 | -2.2850 |
| 224 | H | 40.0878 | 13.6723 | -4.0397 | 248 | H | 50.0047 | 18.3801 | 0.0219  | 272 | H | 58.3103 | 12.2191 | 2.9172  |
| 225 | H | 23.3175 | 7.5373  | 0.3071  | 249 | H | 49.8603 | 16.6067 | 0.1296  | 273 | H | 62.6888 | 17.4703 | 2.6620  |
| 226 | H | 24.9599 | 7.0753  | 0.7501  | 250 | H | 55.4113 | 11.1264 | -1.0541 | 274 | H | 50.1764 | 17.6537 | -3.2474 |
| 227 | H | 28.8762 | 6.9096  | -5.6520 | 251 | H | 53.6977 | 11.3904 | -0.6416 |     |   |         |         |         |
| 228 | H | 31.8497 | 12.7099 | -3.4951 | 252 | H | 61.2639 | 13.2544 | 4.0484  |     |   |         |         |         |

### 7) B<sub>1</sub>

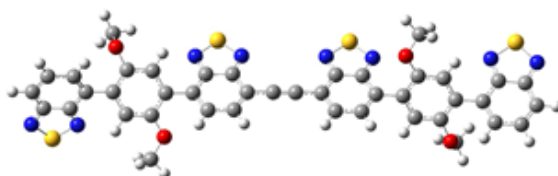

|    |   |          |         |         |    |   |         |         |         |    |   |         |         |         |
|----|---|----------|---------|---------|----|---|---------|---------|---------|----|---|---------|---------|---------|
| 1  | C | -10.7552 | -0.0933 | -0.7492 | 15 | C | -8.6174 | 1.1575  | -0.3876 | 29 | C | -9.1483 | -3.3010 | 0.0946  |
| 2  | C | -11.6073 | 0.6940  | 0.1055  | 16 | O | -9.0501 | -2.4377 | -1.0422 | 30 | C | -7.3491 | 3.5726  | 0.2772  |
| 3  | C | -13.0529 | 0.6438  | -0.0444 | 17 | O | -6.5824 | 2.4187  | -0.0456 | 31 | C | 4.9213  | 0.5302  | -0.2789 |
| 4  | C | -13.6493 | -0.1732 | -1.0417 | 18 | C | -2.0248 | 0.1790  | -0.2859 | 32 | C | 4.2619  | -0.5699 | 0.3627  |
| 5  | C | -12.8152 | -0.9061 | -1.8382 | 19 | C | -2.7569 | -0.8936 | 0.3297  | 33 | C | 2.8142  | -0.6637 | 0.3787  |
| 6  | C | -11.3973 | -0.8681 | -1.6923 | 20 | C | -4.2094 | -0.9262 | 0.2838  | 34 | C | 2.0069  | 0.3510  | -0.2456 |
| 7  | N | -11.2160 | 1.5041  | 1.0946  | 21 | C | -4.9552 | 0.1179  | -0.3694 | 35 | C | 2.6882  | 1.4030  | -0.8313 |
| 8  | S | -12.5744 | 2.1372  | 1.7609  | 22 | C | -4.1990 | 1.1285  | -0.9316 | 36 | C | 4.1044  | 1.4860  | -0.8418 |
| 9  | N | -13.7098 | 1.4140  | 0.8276  | 23 | C | -2.7845 | 1.1600  | -0.8984 | 37 | N | 4.8593  | -1.5685 | 1.0170  |
| 10 | C | -7.0989  | -1.1202 | -0.6808 | 24 | N | -2.2163 | -1.9195 | 0.9838  | 38 | S | 3.6674  | -2.5413 | 1.5790  |
| 11 | C | -6.4318  | 0.0845  | -0.4444 | 25 | S | -3.4580 | -2.8506 | 1.5036  | 39 | N | 2.3537  | -1.7326 | 1.0257  |
| 12 | C | -7.2323  | 1.2436  | -0.2935 | 26 | N | -4.7212 | -1.9867 | 0.9167  | 40 | C | 8.6065  | -0.1699 | -0.8561 |
| 13 | C | -8.4826  | -1.2061 | -0.7779 | 27 | C | -0.6138 | 0.2209  | -0.2596 | 41 | C | 9.2205  | 0.9686  | -0.3078 |
| 14 | C | -9.2785  | -0.0574 | -0.6308 | 28 | C | 0.5965  | 0.2727  | -0.2476 | 42 | C | 8.3896  | 1.9581  | 0.2439  |

continues

## B<sub>1</sub> geometry continuation

|    |   |         |         |         |    |   |          |         |         |    |   |         |         |         |
|----|---|---------|---------|---------|----|---|----------|---------|---------|----|---|---------|---------|---------|
| 43 | C | 7.2239  | -0.3297 | -0.8622 | 57 | C | 7.3610   | -2.4936 | -1.8753 | 71 | H | 4.5623  | 2.3338  | -1.3387 |
| 44 | C | 6.3964  | 0.6612  | -0.2936 | 58 | C | 9.2145   | 3.0345  | 2.1817  | 72 | H | 9.2361  | -0.9306 | -1.2901 |
| 45 | C | 7.0071  | 1.7935  | 0.2420  | 59 | H | -14.7265 | -0.1956 | -1.1433 | 73 | H | 6.3997  | 2.5709  | 0.6907  |
| 46 | O | 8.9071  | 3.1194  | 0.7874  | 60 | H | -13.2313 | -1.5396 | -2.6134 | 74 | H | 10.6792 | 3.1723  | -0.8720 |
| 47 | O | 6.5877  | -1.3839 | -1.4385 | 61 | H | -10.7996 | -1.4804 | -2.3524 | 75 | H | 13.1073 | 3.4482  | -1.0183 |
| 48 | C | 13.5817 | 1.4398  | -0.5146 | 62 | H | -6.5274  | -2.0291 | -0.8040 | 76 | H | 7.9681  | -2.8998 | -1.0602 |
| 49 | C | 13.0205 | 0.1790  | -0.1777 | 63 | H | -9.2165  | 2.0445  | -0.2599 | 77 | H | 8.0096  | -2.2254 | -2.7169 |
| 50 | C | 11.5789 | 0.0069  | -0.1029 | 64 | H | -4.7089  | 1.9413  | -1.4285 | 78 | H | 9.9810  | 2.2757  | 2.3728  |
| 51 | C | 10.6956 | 1.1149  | -0.3598 | 65 | H | -2.2744  | 1.9868  | -1.3778 | 79 | H | 8.3192  | 2.7967  | 2.7667  |
| 52 | C | 11.3029 | 2.3113  | -0.6767 | 66 | H | -9.8161  | -2.8761 | 0.8522  | 80 | H | 14.6567 | 1.5509  | -0.5709 |
| 53 | C | 12.7179 | 2.4714  | -0.7547 | 67 | H | -8.1647  | -3.4789 | 0.5417  | 81 | H | -9.5600 | -4.2432 | -0.2667 |
| 54 | N | 13.7081 | -0.9326 | 0.0998  | 68 | H | -7.9988  | 3.3909  | 1.1392  | 82 | H | -6.6243 | 4.3468  | 0.5237  |
| 55 | S | 12.6024 | -2.0954 | 0.4309  | 69 | H | -7.9561  | 3.9036  | -0.5727 | 83 | H | 6.6422  | -3.2427 | -2.2028 |
| 56 | N | 11.2200 | -1.2361 | 0.2339  | 70 | H | 2.1173   | 2.1897  | -1.3093 | 84 | H | 9.5912  | 4.0138  | 2.4768  |

## 8) B<sub>2</sub>

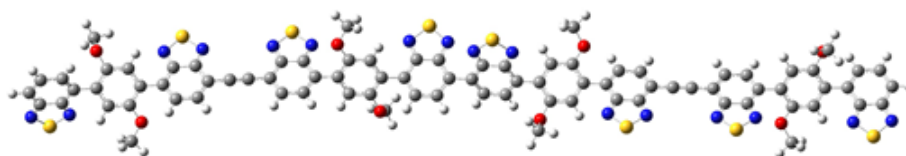

|    |   |          |         |         |    |   |         |         |         |    |   |          |         |         |
|----|---|----------|---------|---------|----|---|---------|---------|---------|----|---|----------|---------|---------|
| 1  | C | -10.8100 | 0.2308  | -0.6023 | 25 | S | -3.6259 | -1.8804 | 2.5372  | 49 | C | 12.9603  | -0.4172 | -0.0495 |
| 2  | C | -11.6162 | 1.3084  | -0.0872 | 26 | N | -4.8538 | -1.2249 | 1.6716  | 50 | C | 11.5138  | -0.4653 | 0.0931  |
| 3  | C | -13.0641 | 1.2759  | -0.2195 | 27 | C | -0.6608 | 0.2276  | -0.1832 | 51 | C | 10.6733  | 0.5023  | -0.5613 |
| 4  | C | -13.7076 | 0.1879  | -0.8676 | 28 | C | 0.5506  | 0.2255  | -0.1824 | 52 | C | 11.3312  | 1.4615  | -1.3008 |
| 5  | C | -12.9162 | -0.8174 | -1.3477 | 29 | C | -9.3438 | -2.5432 | 1.3322  | 53 | C | 12.7454  | 1.4994  | -1.4464 |
| 6  | C | -11.4966 | -0.7965 | -1.2149 | 30 | C | -7.2282 | 3.8596  | -0.9153 | 54 | N | 13.5965  | -1.3453 | 0.6670  |
| 7  | N | -11.1781 | 2.3965  | 0.5543  | 31 | C | 4.8820  | 0.2566  | -0.2824 | 55 | S | 12.4468  | -2.2188 | 1.4356  |
| 8  | S | -12.4991 | 3.2870  | 0.9443  | 32 | C | 4.1824  | -0.4833 | 0.7274  | 56 | N | 11.1031  | -1.4463 | 0.9026  |
| 9  | N | -13.6760 | 2.3344  | 0.3192  | 33 | C | 2.7321  | -0.4987 | 0.7690  | 57 | C | 7.1672   | -3.2556 | -0.5850 |
| 10 | C | -7.2044  | -0.8749 | -0.1496 | 34 | C | 1.9630  | 0.2353  | -0.2009 | 58 | C | 9.3012   | 3.3209  | 1.0472  |
| 11 | C | -6.4804  | 0.3031  | -0.3501 | 35 | C | 2.6832  | 0.9519  | -1.1400 | 59 | H | -14.7856 | 0.1812  | -0.9622 |
| 12 | C | -7.2250  | 1.4766  | -0.6246 | 36 | C | 4.1014  | 0.9606  | -1.1729 | 60 | H | -13.3688 | -1.6639 | -1.8516 |
| 13 | C | -8.5916  | -0.9249 | -0.2199 | 37 | N | 4.7427  | -1.1811 | 1.7180  | 61 | H | -10.9345 | -1.6298 | -1.6116 |
| 14 | C | -9.3321  | 0.2374  | -0.4940 | 38 | S | 3.5159  | -1.8101 | 2.6022  | 62 | H | -6.6766  | -1.7941 | 0.0607  |
| 15 | C | -8.6134  | 1.4275  | -0.6918 | 39 | N | 2.2326  | -1.2166 | 1.7731  | 63 | H | -9.1698  | 2.3293  | -0.8902 |
| 16 | O | -9.2180  | -2.1424 | -0.0356 | 40 | C | 8.5252  | -0.7776 | -0.5301 | 64 | H | -4.6838  | 1.6051  | -1.9187 |
| 17 | O | -6.5189  | 2.6316  | -0.8041 | 41 | C | 9.1956  | 0.4552  | -0.4596 | 65 | H | -2.2494  | 1.5528  | -1.8698 |
| 18 | C | -2.0724  | 0.2437  | -0.2032 | 42 | C | 8.4156  | 1.6171  | -0.3336 | 66 | H | -9.9834  | -1.8475 | 1.8866  |
| 19 | C | -2.8470  | -0.5041 | 0.7488  | 43 | C | 7.1372  | -0.8649 | -0.4793 | 67 | H | -8.3649  | -2.5976 | 1.8196  |
| 20 | C | -4.2998  | -0.4840 | 0.7065  | 44 | C | 6.3611  | 0.3047  | -0.3386 | 68 | H | -7.8770  | 4.0247  | -0.0494 |
| 21 | C | -5.0031  | 0.2922  | -0.2813 | 45 | C | 7.0275  | 1.5271  | -0.2773 | 69 | H | -7.8276  | 3.8969  | -1.8316 |
| 22 | C | -4.2069  | 1.0000  | -1.1612 | 46 | O | 8.9909  | 2.8732  | -0.2753 | 70 | H | 2.1419   | 1.5209  | -1.8861 |
| 23 | C | -2.7922  | 0.9757  | -1.1310 | 47 | O | 6.4483  | -2.0297 | -0.6086 | 71 | H | 4.5902   | 1.5320  | -1.9537 |
| 24 | N | -2.3478  | -1.2537 | 1.7294  | 48 | C | 13.5869 | 0.5835  | -0.8607 | 72 | H | 9.1154   | -1.6740 | -0.6373 |

continues

## B<sub>2</sub> geometry continuation

|     |   |         |         |         |     |   |         |         |         |     |   |         |         |         |
|-----|---|---------|---------|---------|-----|---|---------|---------|---------|-----|---|---------|---------|---------|
| 73  | H | 6.4604  | 2.4437  | -0.1645 | 105 | C | 24.6011 | 0.6661  | -0.7146 | 137 | N | 42.1689 | 4.1638  | -2.9833 |
| 74  | H | 10.7479 | 2.2185  | -1.8060 | 106 | C | 26.0094 | 0.7990  | -0.7550 | 138 | S | 40.9520 | 4.8435  | -3.8442 |
| 75  | H | 13.1714 | 2.2706  | -2.0784 | 107 | N | 26.2935 | 2.6204  | -3.9094 | 139 | N | 39.6720 | 4.0399  | -3.2086 |
| 76  | H | 7.7679  | -3.3460 | 0.3255  | 108 | S | 24.9750 | 3.0197  | -4.7932 | 140 | C | 35.5936 | 5.7022  | -1.9733 |
| 77  | H | 7.8146  | -3.3592 | -1.4630 | 109 | N | 23.7975 | 2.3999  | -3.8359 | 141 | C | 38.2775 | -0.8400 | -2.6492 |
| 78  | H | 10.0315 | 2.6609  | 1.5276  | 110 | C | 28.0805 | 1.5711  | -1.8117 | 142 | H | 15.2536 | 2.6455  | -0.3555 |
| 79  | H | 8.3988  | 3.3696  | 1.6665  | 111 | C | 29.2877 | 1.6710  | -1.8199 | 143 | H | 17.6693 | 2.7951  | -0.6445 |
| 80  | H | -9.8023 | -3.5319 | 1.3243  | 112 | C | 19.2397 | 3.3990  | -3.6779 | 144 | H | 21.9248 | 3.0452  | -2.3206 |
| 81  | H | -6.4660 | 4.6362  | -0.9532 | 113 | C | 21.8187 | -2.4279 | -0.5160 | 145 | H | 19.7618 | -1.0784 | -0.7592 |
| 82  | H | 6.4123  | -4.0398 | -0.6030 | 114 | C | 33.6066 | 2.0084  | -1.7452 | 146 | H | 24.1690 | 0.1406  | 0.1247  |
| 83  | H | 9.7254  | 4.3198  | 0.9454  | 115 | C | 32.8540 | 2.5352  | -2.8465 | 147 | H | 26.5916 | 0.3800  | 0.0568  |
| 84  | C | 17.9626 | 0.8146  | -1.3459 | 116 | C | 31.4076 | 2.4258  | -2.8802 | 148 | H | 18.6761 | 2.5821  | -4.1420 |
| 85  | C | 17.2483 | -0.3900 | -1.6811 | 117 | C | 30.6961 | 1.7791  | -1.8094 | 149 | H | 20.2232 | 3.4720  | -4.1534 |
| 86  | C | 15.8033 | -0.4678 | -1.5335 | 118 | C | 31.4676 | 1.2666  | -0.7817 | 150 | H | 21.1914 | -2.7718 | -1.3444 |
| 87  | C | 15.0530 | 0.6444  | -1.0317 | 119 | C | 32.8816 | 1.3788  | -0.7574 | 151 | H | 21.2177 | -2.3755 | 0.3984  |
| 88  | C | 15.7748 | 1.7792  | -0.7474 | 120 | N | 33.3604 | 3.1262  | -3.9311 | 152 | H | 30.9709 | 0.7689  | 0.0423  |
| 89  | C | 17.1859 | 1.8633  | -0.9010 | 121 | S | 32.0908 | 3.5186  | -4.8885 | 153 | H | 33.4115 | 0.9678  | 0.0944  |
| 90  | N | 17.7794 | -1.5091 | -2.1833 | 122 | N | 30.8561 | 2.9481  | -3.9739 | 154 | H | 37.6654 | 4.3101  | -1.7079 |
| 91  | S | 16.5402 | -2.5488 | -2.4507 | 123 | C | 37.1515 | 3.3623  | -1.6779 | 155 | H | 35.3600 | -0.0362 | -1.5566 |
| 92  | N | 15.2876 | -1.6275 | -1.9439 | 124 | C | 37.9210 | 2.1915  | -1.5749 | 156 | H | 39.5988 | 0.7906  | 0.0142  |
| 93  | C | 21.4700 | 2.1279  | -1.9750 | 125 | C | 37.2399 | 0.9636  | -1.5246 | 157 | H | 42.0324 | 0.9364  | 0.2367  |
| 94  | C | 22.2846 | 1.0541  | -1.6067 | 126 | C | 35.7610 | 3.3273  | -1.7291 | 158 | H | 36.1876 | 5.7071  | -2.8927 |
| 95  | C | 21.6341 | -0.1220 | -1.1581 | 127 | C | 35.0844 | 2.0901  | -1.6930 | 159 | H | 36.2278 | 5.9862  | -1.1259 |
| 96  | C | 20.0829 | 2.0764  | -1.9069 | 128 | C | 35.8492 | 0.9305  | -1.5821 | 160 | H | 38.9563 | -0.1965 | -3.2191 |
| 97  | C | 19.4355 | 0.9117  | -1.4605 | 129 | O | 37.9163 | -0.2363 | -1.4038 | 161 | H | 37.3891 | -1.0513 | -3.2545 |
| 98  | C | 20.2460 | -0.1747 | -1.0923 | 130 | O | 34.9783 | 4.4383  | -1.7639 | 162 | H | 43.3685 | 2.5153  | -1.1500 |
| 99  | O | 19.3611 | 3.1982  | -2.2664 | 131 | C | 42.2919 | 2.4456  | -1.2356 | 163 | H | 18.7002 | 4.3364  | -3.8120 |
| 100 | O | 22.4287 | -1.1775 | -0.8131 | 132 | C | 41.6038 | 3.2743  | -2.1618 | 164 | H | 22.6401 | -3.1267 | -0.3662 |
| 101 | C | 26.6746 | 1.4447  | -1.7823 | 133 | C | 40.1574 | 3.2007  | -2.2879 | 165 | H | 34.7767 | 6.4161  | -2.0632 |
| 102 | C | 25.8491 | 1.9827  | -2.8285 | 134 | C | 39.3987 | 2.2792  | -1.4822 | 166 | H | 38.7818 | -1.7752 | -2.4062 |
| 103 | C | 24.4023 | 1.8528  | -2.7767 | 135 | C | 40.1260 | 1.5009  | -0.6071 |     |   |         |         |         |
| 104 | C | 23.7566 | 1.1734  | -1.6836 | 136 | C | 41.5444 | 1.5829  | -0.4840 |     |   |         |         |         |

9) C<sub>1</sub>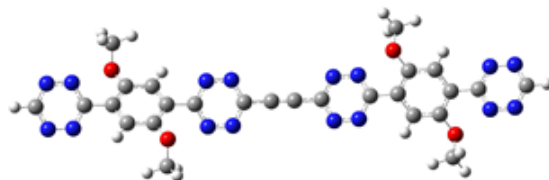

|    |   |         |         |         |    |   |          |         |         |    |   |          |         |         |
|----|---|---------|---------|---------|----|---|----------|---------|---------|----|---|----------|---------|---------|
| 1  | N | 12.2077 | 1.3671  | 0.4720  | 23 | N | -2.6358  | -1.2185 | -0.7599 | 45 | C | 0.6034   | 0.0042  | -0.6266 |
| 2  | N | 12.2170 | -0.9755 | 0.8630  | 24 | N | -2.6685  | 1.1540  | -0.5093 | 46 | C | -0.6021  | -0.0040 | -0.6262 |
| 3  | C | 12.8222 | 0.2051  | 0.7001  | 25 | C | -2.0223  | -0.0243 | -0.6152 | 47 | H | 13.9010  | 0.2253  | 0.7959  |
| 4  | N | 10.9019 | 1.3324  | 0.3020  | 26 | N | -3.9391  | -1.2456 | -0.6540 | 48 | H | 8.5391   | 2.0075  | 1.1339  |
| 5  | C | 10.2883 | 0.1385  | 0.3854  | 27 | C | -4.5796  | -0.0888 | -0.3804 | 49 | H | 6.3271   | -1.7817 | -1.1314 |
| 6  | N | 10.9111 | -1.0109 | 0.7157  | 28 | N | -3.9718  | 1.1131  | -0.3815 | 50 | H | 9.2824   | -3.2516 | 0.5424  |
| 7  | C | 8.0548  | 1.1852  | 0.6233  | 29 | C | -6.8101  | 0.9604  | -0.6146 | 51 | H | 7.8118   | -3.6041 | -0.4242 |
| 8  | C | 6.6718  | 1.1951  | 0.4774  | 30 | C | -8.1921  | 0.9693  | -0.4663 | 52 | H | 5.5819   | 3.4855  | -0.5245 |
| 9  | C | 6.0373  | 0.1141  | -0.1658 | 31 | C | -8.8256  | -0.1127 | 0.1747  | 53 | H | 7.0562   | 3.8297  | 0.4389  |
| 10 | C | 8.8275  | 0.1125  | 0.1684  | 32 | C | -6.0357  | -0.1141 | -0.1615 | 54 | H | -6.3262  | 1.7822  | -1.1260 |
| 11 | C | 8.1935  | -0.9692 | -0.4726 | 33 | C | -6.6697  | -1.1955 | 0.4816  | 55 | H | -8.5366  | -2.0081 | 1.1391  |
| 12 | C | 6.8114  | -0.9602 | -0.6200 | 34 | C | -8.0527  | -1.1856 | 0.6285  | 56 | H | -13.8987 | -0.2257 | 0.8058  |
| 13 | O | 8.9461  | -1.9548 | -1.0480 | 35 | O | -8.9451  | 1.9552  | -1.0407 | 57 | H | -7.0541  | -3.8300 | 0.4421  |
| 14 | O | 5.9214  | 2.1788  | 1.0573  | 36 | O | -5.9189  | -2.1794 | 1.0606  | 58 | H | -5.5805  | -3.4854 | -0.5221 |
| 15 | N | 2.6370  | 1.2188  | -0.7612 | 37 | N | -12.2147 | 0.9750  | 0.8722  | 59 | H | -9.2802  | 3.2512  | 0.5506  |
| 16 | N | 2.6699  | -1.1539 | -0.5117 | 38 | N | -12.2056 | -1.3674 | 0.4800  | 60 | H | -7.8104  | 3.6042  | -0.4169 |
| 17 | C | 2.0236  | 0.0245  | -0.6167 | 39 | C | -12.8200 | -0.2055 | 0.7092  | 61 | H | 9.4284   | -3.9221 | -1.1046 |
| 18 | N | 3.9404  | 1.2459  | -0.6562 | 40 | N | -10.9089 | 1.0105  | 0.7240  | 62 | H | 5.4420   | 4.1465  | 1.1266  |
| 19 | C | 4.5811  | 0.0888  | -0.3837 | 41 | C | -10.2862 | -0.1387 | 0.3927  | 63 | H | -5.4395  | -4.1471 | 1.1285  |
| 20 | N | 3.9732  | -1.1130 | -0.3849 | 42 | N | -10.9000 | -1.3326 | 0.3092  | 64 | H | -9.4275  | 3.9225  | -1.0960 |
| 21 | C | 8.8501  | -3.2612 | -0.4611 | 43 | C | -6.0154  | -3.4889 | 0.4803  |    |   |          |         |         |
| 22 | C | 6.0175  | 3.4886  | 0.4776  | 44 | C | -8.8487  | 3.2613  | -0.4533 |    |   |          |         |         |

10) C<sub>2</sub>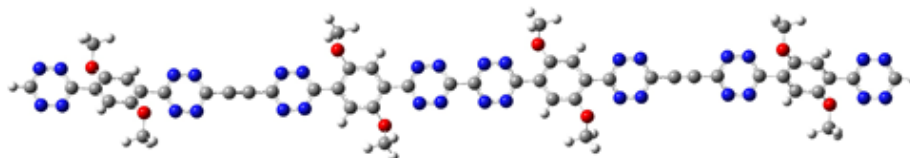

|    |   |          |         |         |    |   |         |         |         |    |   |         |         |         |
|----|---|----------|---------|---------|----|---|---------|---------|---------|----|---|---------|---------|---------|
| 1  | N | -10.7998 | -1.0601 | 1.1474  | 13 | O | -7.5287 | 1.4394  | -1.5766 | 25 | C | 3.4153  | -0.2083 | -0.5521 |
| 2  | N | -10.8330 | 1.2287  | 0.5098  | 14 | O | -4.5438 | -1.6370 | 1.9307  | 26 | N | 5.3237  | 0.9854  | -0.8654 |
| 3  | C | -11.4244 | 0.0844  | 0.8637  | 15 | N | -1.2327 | -1.4130 | -0.0853 | 27 | C | 5.9768  | -0.1090 | -0.4204 |
| 4  | N | -9.4944  | -1.0877 | 0.9731  | 16 | N | -1.2816 | 0.8578  | -0.8222 | 28 | N | 5.3739  | -1.2891 | -0.1797 |
| 5  | C | -8.8922  | 0.0357  | 0.5423  | 17 | C | -0.6301 | -0.2624 | -0.4511 | 29 | C | 8.1895  | -1.2127 | -0.5213 |
| 6  | N | -9.5259  | 1.2111  | 0.3584  | 18 | N | -2.5364 | -1.4009 | 0.0329  | 30 | C | 9.5764  | -1.2149 | -0.4296 |
| 7  | C | -6.6635  | -0.8539 | 1.1538  | 19 | C | -3.1837 | -0.2371 | -0.1893 | 31 | C | 10.2440 | -0.0349 | -0.0440 |
| 8  | C | -5.2812  | -0.9297 | 1.0247  | 20 | N | -2.5838 | 0.8663  | -0.6773 | 32 | C | 7.4414  | -0.0564 | -0.2722 |
| 9  | C | -4.6400  | -0.1770 | 0.0200  | 21 | C | -7.4554 | 2.8690  | -1.4769 | 33 | C | 8.1095  | 1.1237  | 0.1137  |
| 10 | C | -7.4315  | -0.0236 | 0.3318  | 22 | C | -4.6234 | -3.0672 | 1.8420  | 34 | C | 9.4966  | 1.1212  | 0.2050  |
| 11 | C | -6.7910  | 0.7297  | -0.6720 | 23 | N | 4.0164  | 0.9426  | -0.9199 | 35 | O | 10.2917 | -2.3113 | -0.8163 |
| 12 | C | -5.4093  | 0.6547  | -0.8022 | 24 | N | 4.0670  | -1.3500 | -0.2534 | 36 | O | 7.3960  | 2.2213  | 0.5007  |

continues

## C<sub>2</sub> geometry continuation

|    |   |          |         |         |     |   |         |         |         |     |   |         |         |         |
|----|---|----------|---------|---------|-----|---|---------|---------|---------|-----|---|---------|---------|---------|
| 46 | C | 1.9951   | -0.2306 | -0.5233 | 79  | N | 25.9419 | 1.6174  | -0.2535 | 103 | N | 39.5348 | -0.9438 | 0.3582  |
| 47 | H | -12.5030 | 0.0964  | 0.9620  | 80  | C | 26.5936 | 0.4757  | -0.5521 | 104 | C | 38.9012 | 0.2316  | 0.5422  |
| 48 | H | -7.1518  | -1.4221 | 1.9345  | 81  | N | 24.6852 | -0.7180 | -0.8655 | 105 | N | 39.5033 | 1.3550  | 0.9730  |
| 49 | H | -4.9216  | 1.2220  | -1.5836 | 82  | C | 24.0321 | 0.3764  | -0.4205 | 106 | C | 34.6324 | 3.3345  | 1.8420  |
| 50 | H | -7.9180  | 3.2034  | -0.5454 | 83  | N | 24.6350 | 1.5565  | -0.1798 | 107 | C | 37.4643 | -2.6016 | -1.4771 |
| 51 | H | -6.4195  | 3.2176  | -1.5344 | 84  | C | 19.7777 | 3.7216  | 0.0501  | 108 | C | 28.0139 | 0.4980  | -0.5234 |
| 52 | H | -4.1641  | -3.4108 | 0.9123  | 85  | C | 22.5554 | -3.0943 | -0.3692 | 109 | C | 29.2189 | 0.5132  | -0.4937 |
| 53 | H | -5.6606  | -3.4109 | 1.9036  | 86  | N | 31.2416 | 1.6803  | -0.0853 | 110 | H | 20.0021 | -1.7561 | 0.5152  |
| 54 | H | 7.6792   | -2.1145 | -0.8325 | 87  | N | 31.2905 | -0.5904 | -0.8223 | 111 | H | 22.3297 | 2.3819  | -0.8325 |
| 55 | H | 10.0068  | 2.0234  | 0.5153  | 88  | C | 30.6390 | 0.5298  | -0.4512 | 112 | H | 19.2882 | 3.4968  | 1.0006  |
| 56 | H | 8.4875   | 3.6737  | -0.5456 | 89  | N | 32.5453 | 1.6683  | 0.0328  | 113 | H | 20.8120 | 4.0363  | 0.2196  |
| 57 | H | 6.9579   | 3.1355  | -1.3159 | 90  | C | 33.1927 | 0.5044  | -0.1894 | 114 | H | 23.0510 | -2.8681 | -1.3161 |
| 58 | H | 10.7208  | -3.2295 | 1.0005  | 91  | N | 32.5927 | -0.5989 | -0.6774 | 115 | H | 21.5214 | -3.4063 | -0.5458 |
| 59 | H | 9.1969   | -3.7689 | 0.2195  | 92  | C | 35.4183 | -0.3873 | -0.8023 | 116 | H | 34.9305 | -0.9546 | -1.5838 |
| 60 | H | -8.0163  | 3.2580  | -2.3252 | 93  | C | 36.7999 | -0.4623 | -0.6721 | 117 | H | 37.1607 | 1.6894  | 1.9345  |
| 61 | H | -4.0622  | -3.4520 | 2.6919  | 94  | C | 37.4405 | 0.2910  | 0.3316  | 118 | H | 42.5119 | 0.1709  | 0.9619  |
| 62 | H | 6.9168   | 4.1575  | 0.1446  | 95  | C | 34.6489 | 0.4444  | 0.0199  | 119 | H | 35.6695 | 3.6782  | 1.9037  |
| 63 | H | 10.7729  | -4.2473 | -0.4625 | 96  | C | 35.2901 | 1.1971  | 1.0246  | 120 | H | 34.1730 | 3.6782  | 0.9123  |
| 64 | N | 16.3855  | -0.9779 | -0.0718 | 97  | C | 36.6724 | 1.1213  | 1.1537  | 121 | H | 37.9270 | -2.9360 | -0.5457 |
| 65 | N | 16.3421  | 1.2928  | 0.6312  | 98  | O | 37.5376 | -1.1719 | -1.5768 | 122 | H | 36.4284 | -2.9501 | -1.5346 |
| 66 | C | 15.7460  | 0.1500  | 0.2600  | 99  | O | 34.5528 | 1.9043  | 1.9306  | 123 | H | 19.2361 | 4.5147  | -0.4623 |
| 76 | O | 19.7172  | 2.5787  | -0.8162 | 100 | N | 40.8419 | -0.9613 | 0.5097  | 124 | H | 23.0921 | -3.8901 | 0.1444  |
| 77 | O | 22.6129  | -1.9539 | 0.5005  | 101 | N | 40.8087 | 1.3274  | 1.1473  | 125 | H | 34.0711 | 3.7192  | 2.6919  |
| 78 | N | 25.9925  | -0.6752 | -0.9200 | 102 | C | 41.4333 | 0.1830  | 0.8635  | 126 | H | 38.0252 | -2.9905 | -2.3254 |

## 11) D<sub>1</sub>

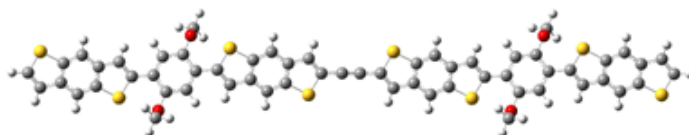

|    |   |         |         |         |    |   |         |         |         |    |   |         |         |         |
|----|---|---------|---------|---------|----|---|---------|---------|---------|----|---|---------|---------|---------|
| 1  | C | 13.2224 | 2.9964  | -1.5163 | 15 | C | 2.8670  | -0.9922 | -0.3409 | 29 | C | 11.1296 | 1.0991  | -0.0845 |
| 2  | C | 10.6679 | -3.0338 | 1.5786  | 16 | C | 2.0068  | 0.0046  | 0.0355  | 30 | C | 10.5091 | -0.1535 | 0.0445  |
| 3  | C | 18.4971 | 1.4033  | 0.5640  | 17 | S | 2.8711  | 1.4447  | 0.6167  | 31 | C | 13.3591 | 0.1279  | 0.0215  |
| 4  | C | 19.6220 | 0.6228  | 0.2718  | 18 | C | 0.6070  | -0.0059 | 0.0071  | 32 | C | 12.7387 | -1.1245 | 0.1499  |
| 5  | C | 19.4482 | -0.6852 | -0.2679 | 19 | C | 5.6743  | 1.2050  | 0.5723  | 33 | C | 11.3596 | -1.2719 | 0.1525  |
| 6  | C | 18.1948 | -1.2240 | -0.5161 | 20 | C | 6.7990  | 0.4202  | 0.2809  | 34 | O | 13.0373 | 2.5154  | -0.1789 |
| 7  | C | 17.0705 | -0.4435 | -0.2171 | 21 | C | 6.6267  | -0.8966 | -0.2361 | 35 | O | 10.8294 | -2.5404 | 0.2426  |
| 8  | C | 17.2424 | 0.8643  | 0.3198  | 22 | C | 5.3732  | -1.4400 | -0.4678 | 36 | C | -0.6070 | 0.0066  | -0.0087 |
| 9  | C | 21.0137 | 0.9511  | 0.4382  | 23 | C | 4.2466  | -0.6549 | -0.1829 | 37 | C | -8.1819 | -0.7497 | -0.4359 |
| 10 | C | 21.8453 | -0.0434 | 0.0490  | 24 | C | 4.4210  | 0.6631  | 0.3374  | 38 | C | -9.0456 | 0.2433  | -0.0656 |
| 11 | S | 21.0048 | -1.4589 | -0.5505 | 25 | C | 8.1819  | 0.7500  | 0.4352  | 39 | S | -8.1759 | 1.6865  | 0.4896  |
| 12 | C | 15.6861 | -0.7703 | -0.3797 | 26 | C | 9.0456  | -0.2431 | 0.0649  | 40 | C | -5.3732 | 1.4406  | 0.4664  |
| 13 | C | 14.8230 | 0.2172  | 0.0030  | 27 | S | 8.1759  | -1.6861 | -0.4906 | 41 | C | -4.2466 | 0.6556  | 0.1814  |
| 14 | S | 15.6930 | 1.6514  | 0.5818  | 28 | C | 12.5086 | 1.2465  | -0.0875 | 42 | C | -4.4210 | -0.6626 | -0.3386 |

continues

## D<sub>1</sub> geometry continuation

|    |   |          |         |         |    |   |          |         |         |     |   |          |         |         |
|----|---|----------|---------|---------|----|---|----------|---------|---------|-----|---|----------|---------|---------|
| 43 | C | -5.6743  | -1.2046 | -0.5732 | 64 | C | -10.5090 | 0.1537  | -0.0448 | 85  | H | -8.5165  | -1.7007 | -0.8292 |
| 44 | C | -6.7990  | -0.4198 | -0.2819 | 65 | C | -11.1295 | -1.0990 | 0.0844  | 86  | H | -5.2556  | 2.4441  | 0.8587  |
| 45 | C | -6.6267  | 0.8970  | 0.2349  | 66 | C | -12.5084 | -1.2465 | 0.0878  | 87  | H | -5.7916  | -2.2068 | -0.9688 |
| 46 | C | -2.8670  | 0.9929  | 0.3392  | 67 | O | -10.8296 | 2.5405  | -0.2429 | 88  | H | -2.5188  | 1.9440  | 0.7191  |
| 47 | C | -2.0068  | -0.0039 | -0.0371 | 68 | O | -13.0370 | -2.5154 | 0.1794  | 89  | H | -21.3606 | -1.8975 | -0.8325 |
| 48 | S | -2.8711  | -1.4442 | -0.6180 | 69 | C | -10.6685 | 3.0339  | -1.5790 | 90  | H | -22.9247 | 0.0483  | -0.0688 |
| 49 | C | -21.0137 | -0.9519 | -0.4366 | 70 | C | -13.2221 | -2.9961 | 1.5169  | 91  | H | -18.0790 | 2.2196  | 0.9284  |
| 50 | C | -21.8453 | 0.0425  | -0.0472 | 71 | H | 13.9085  | 2.3520  | -2.0748 | 92  | H | -18.6128 | -2.4014 | -0.9711 |
| 51 | S | -21.0049 | 1.4580  | 0.5522  | 72 | H | 10.2389  | -4.0307 | 1.4878  | 93  | H | -15.3515 | 1.7148  | 0.7885  |
| 52 | C | -18.1949 | 1.2234  | 0.5173  | 73 | H | 9.9899   | -2.3955 | 2.1539  | 94  | H | -13.3397 | 2.0180  | -0.2632 |
| 53 | C | -17.0704 | 0.4430  | 0.2181  | 74 | H | 18.6129  | 2.4009  | 0.9722  | 95  | H | -10.5296 | -1.9932 | 0.1982  |
| 54 | C | -17.2424 | -0.8647 | -0.3188 | 75 | H | 18.0789  | -2.2202 | -0.9271 | 96  | H | -10.2391 | 4.0307  | -1.4883 |
| 55 | C | -18.4970 | -1.4039 | -0.5628 | 76 | H | 21.3607  | 1.8967  | 0.8342  | 97  | H | -9.9909  | 2.3955  | -2.1546 |
| 56 | C | -19.6220 | -0.6235 | -0.2704 | 77 | H | 22.9247  | -0.0494 | 0.0708  | 98  | H | -13.6518 | -3.9929 | 1.4281  |
| 57 | C | -19.4482 | 0.6845  | 0.2694  | 78 | H | 15.3515  | -1.7151 | -0.7877 | 99  | H | -13.9082 | -2.3515 | 2.0753  |
| 58 | C | -15.6861 | 0.7700  | 0.3805  | 79 | H | 2.5188   | -1.9432 | -0.7210 | 100 | H | 13.6520  | 3.9932  | -1.4272 |
| 59 | C | -14.8230 | -0.2174 | -0.0024 | 80 | H | 5.7917   | 2.2071  | 0.9681  | 101 | H | 12.2643  | 3.0546  | -2.0434 |
| 60 | S | -15.6929 | -1.6517 | -0.5812 | 81 | H | 5.2556   | -2.4434 | -0.8604 | 102 | H | 11.6345  | -3.0947 | 2.0893  |
| 61 | C | -11.3597 | 1.2720  | -0.1527 | 82 | H | 8.5165   | 1.7008  | 0.8287  | 103 | H | -11.6352 | 3.0951  | -2.0893 |
| 62 | C | -12.7388 | 1.1244  | -0.1498 | 83 | H | 10.5298  | 1.9933  | -0.1983 | 104 | H | -12.2641 | -3.0543 | 2.0440  |
| 63 | C | -13.3591 | -0.1280 | -0.0212 | 84 | H | 13.3395  | -2.0181 | 0.2634  |     |   |          |         |         |

## 12) D<sub>2</sub>

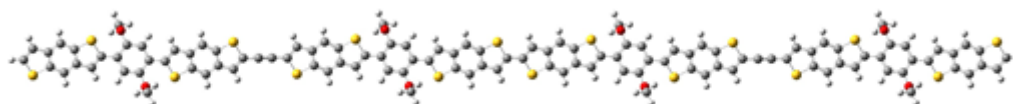

|    |   |         |         |         |    |   |         |         |         |    |   |          |         |         |
|----|---|---------|---------|---------|----|---|---------|---------|---------|----|---|----------|---------|---------|
| 1  | C | 13.0162 | 3.3686  | -1.7167 | 19 | C | 5.6290  | 1.1765  | 0.5031  | 37 | C | -8.2344  | -0.8619 | -0.1388 |
| 2  | C | 10.7285 | -3.0362 | 0.7780  | 20 | C | 6.7503  | 0.4553  | 0.0693  | 38 | C | -9.0887  | 0.0643  | 0.3918  |
| 3  | C | 18.4266 | 1.6735  | -0.1153 | 21 | C | 6.5737  | -0.7943 | -0.5926 | 39 | S | -8.2066  | 1.4348  | 1.0926  |
| 4  | C | 19.5495 | 0.9526  | -0.5423 | 22 | C | 5.3189  | -1.3324 | -0.8303 | 40 | C | -5.4058  | 1.2297  | 0.9216  |
| 5  | C | 19.3714 | -0.2990 | -1.2020 | 23 | C | 4.1954  | -0.6100 | -0.4032 | 41 | C | -4.2867  | 0.5027  | 0.4906  |
| 6  | C | 18.1196 | -0.8402 | -1.4396 | 24 | C | 4.3744  | 0.6405  | 0.2623  | 42 | C | -4.4734  | -0.7398 | -0.1874 |
| 7  | C | 16.9963 | -0.1198 | -1.0063 | 25 | C | 8.1337  | 0.7939  | 0.1977  | 43 | C | -5.7316  | -1.2633 | -0.4375 |
| 8  | C | 17.1715 | 1.1314  | -0.3492 | 26 | C | 8.9938  | -0.1298 | -0.3278 | 44 | C | -6.8486  | -0.5371 | -0.0007 |
| 9  | C | 20.9325 | 1.2967  | -0.4140 | 27 | S | 8.1210  | -1.5153 | -1.0103 | 45 | C | -6.6640  | 0.7044  | 0.6743  |
| 10 | C | 21.7918 | 0.3744  | -0.9411 | 28 | C | 12.4196 | 1.4436  | -0.4701 | 46 | C | -2.9043  | 0.8354  | 0.6320  |
| 11 | S | 20.9220 | -1.0047 | -1.6422 | 29 | C | 11.0452 | 1.2662  | -0.4188 | 47 | C | -2.0536  | -0.0930 | 0.0938  |
| 12 | C | 15.6134 | -0.4611 | -1.1327 | 30 | C | 10.4527 | -0.0064 | -0.4062 | 48 | S | -2.9311  | -1.4582 | -0.6307 |
| 13 | C | 14.7520 | 0.4632  | -0.6098 | 31 | C | 13.2932 | 0.3392  | -0.5314 | 49 | C | -21.0538 | -1.2128 | 0.3495  |
| 14 | S | 15.6240 | 1.8513  | 0.0680  | 32 | C | 12.7006 | -0.9334 | -0.5188 | 50 | C | -21.8749 | -0.2882 | 0.8999  |
| 15 | C | 2.8150  | -0.9540 | -0.5385 | 33 | C | 11.3262 | -1.1108 | -0.4678 | 51 | S | -21.0193 | 1.0454  | 1.6474  |
| 16 | C | 1.9588  | -0.0262 | -0.0080 | 34 | O | 12.9228 | 2.7256  | -0.4390 | 52 | C | -18.2117 | 0.8499  | 1.4697  |
| 17 | S | 2.8280  | 1.3519  | 0.7021  | 35 | O | 10.8225 | -2.3926 | -0.4995 | 53 | C | -17.0957 | 0.1289  | 1.0252  |
| 18 | C | 0.5594  | -0.0595 | 0.0238  | 36 | C | -0.6541 | -0.0655 | 0.0627  | 54 | C | -17.2814 | -1.0985 | 0.3273  |

continues

## D<sub>2</sub> geometry continuation

|    |   |          |         |         |     |   |          |         |         |     |   |         |         |         |
|----|---|----------|---------|---------|-----|---|----------|---------|---------|-----|---|---------|---------|---------|
| 55 | C | -18.5417 | -1.6152 | 0.0643  | 100 | H | 12.0267  | 3.4657  | -2.1753 | 145 | C | 40.6531 | 0.1536  | -2.1754 |
| 56 | C | -19.6585 | -0.8932 | 0.5021  | 101 | H | 11.7178  | -3.1335 | 1.2370  | 146 | C | 39.3992 | -0.3860 | -2.4120 |
| 57 | C | -19.4708 | 0.3340  | 1.2028  | 102 | H | -11.7830 | 3.1258  | -1.1310 | 147 | C | 38.2768 | 0.3369  | -1.9839 |
| 58 | C | -15.7080 | 0.4478  | 1.1737  | 103 | H | -12.1962 | -3.5193 | 2.1817  | 148 | C | 38.4517 | 1.5919  | -1.3317 |
| 59 | C | -14.8552 | -0.4703 | 0.6292  | 104 | C | 58.1880  | 4.2396  | -3.6519 | 149 | C | 42.2100 | 1.7566  | -1.3872 |
| 60 | S | -15.7392 | -1.8259 | -0.0986 | 105 | C | 55.8327  | -2.1652 | -1.2232 | 150 | C | 43.0677 | 0.8261  | -1.9105 |
| 61 | C | -11.4111 | 1.0674  | 0.5349  | 106 | C | 63.5623  | 2.4834  | -2.0013 | 151 | S | 42.2005 | -0.5588 | -2.6097 |
| 62 | C | -12.7879 | 0.9042  | 0.5746  | 107 | C | 64.6816  | 1.7623  | -2.4340 | 152 | C | 24.0946 | -0.5134 | -1.4962 |
| 63 | C | -13.3940 | -0.3617 | 0.5630  | 108 | C | 64.4981  | 0.5287  | -3.1246 | 153 | C | 23.2347 | 0.4137  | -0.9788 |
| 64 | C | -10.5493 | -0.0451 | 0.4604  | 109 | C | 63.2409  | 0.0059  | -3.3865 | 154 | S | 24.1035 | 1.8006  | -0.2920 |
| 65 | C | -11.1556 | -1.3113 | 0.4496  | 110 | C | 62.1224  | 0.7261  | -2.9471 | 155 | C | 26.9061 | 1.6347  | -0.4903 |
| 66 | C | -12.5322 | -1.4745 | 0.4897  | 111 | C | 62.3039  | 1.9598  | -2.2592 | 156 | C | 28.0299 | 0.9108  | -0.9162 |
| 67 | O | -10.8936 | 2.3430  | 0.5901  | 112 | C | 66.0758  | 2.0884  | -2.2849 | 157 | C | 27.8556 | -0.3467 | -1.5614 |
| 68 | O | -13.0481 | -2.7508 | 0.4357  | 113 | C | 66.9000  | 1.1625  | -2.8283 | 158 | C | 26.6009 | -0.8918 | -1.7903 |
| 69 | C | -10.7944 | 3.0097  | -0.6749 | 114 | S | 66.0491  | -0.1803 | -3.5645 | 159 | C | 25.4775 | -0.1674 | -1.3709 |
| 70 | C | -13.1754 | -3.4035 | 1.7054  | 115 | C | 60.7358  | 0.4008  | -3.0923 | 160 | C | 25.6547 | 1.0907  | -0.7232 |
| 71 | H | 13.6780  | 2.8132  | -2.3887 | 116 | C | 59.8799  | 1.3200  | -2.5547 | 161 | C | 29.4125 | 1.2543  | -0.7929 |
| 72 | H | 10.3122  | -4.0254 | 0.5933  | 117 | S | 60.7591  | 2.6848  | -1.8382 | 162 | C | 30.2747 | 0.3258  | -1.3069 |
| 73 | H | 10.0665  | -2.4810 | 1.4499  | 118 | C | 47.9336  | -0.0280 | -2.5437 | 163 | S | 29.4038 | -1.0693 | -1.9716 |
| 74 | H | 18.5458  | 2.6276  | 0.3850  | 119 | C | 47.0799  | 0.9018  | -2.0129 | 164 | C | 33.6991 | 1.9018  | -1.4599 |
| 75 | H | 18.0006  | -1.7926 | -1.9431 | 120 | S | 47.9529  | 2.2756  | -1.2992 | 165 | C | 32.3248 | 1.7234  | -1.4081 |
| 76 | H | 21.2700  | 2.2095  | 0.0603  | 121 | C | 45.6804  | 0.8704  | -1.9817 | 166 | C | 31.7334 | 0.4504  | -1.3861 |
| 77 | H | 15.2761  | -1.3677 | -1.6178 | 122 | C | 50.7539  | 2.0887  | -1.4913 | 167 | C | 34.5736 | 0.7978  | -1.5131 |
| 78 | H | 2.4635   | -1.8599 | -1.0136 | 123 | C | 51.8733  | 1.3629  | -1.9227 | 168 | C | 33.9824 | -0.4752 | -1.4913 |
| 79 | H | 5.7499   | 2.1269  | 1.0098  | 124 | C | 51.6929  | 0.1156  | -2.5878 | 169 | C | 32.6081 | -0.6536 | -1.4390 |
| 80 | H | 5.1980   | -2.2844 | -1.3341 | 125 | C | 50.4364  | -0.4161 | -2.8306 | 170 | O | 34.2015 | 3.1843  | -1.4374 |
| 81 | H | 8.4720   | 1.6985  | 0.6858  | 126 | C | 49.3149  | 0.3105  | -2.4052 | 171 | O | 32.1060 | -1.9362 | -1.4610 |
| 82 | H | 10.4253  | 2.1538  | -0.3999 | 127 | C | 49.4975  | 1.5589  | -1.7370 | 172 | C | 34.2944 | 3.8191  | -2.7193 |
| 83 | H | 13.3204  | -1.8210 | -0.5377 | 128 | C | 53.2580  | 1.6936  | -1.7875 | 173 | C | 32.0154 | -2.5713 | -0.1790 |
| 84 | H | -8.5785  | -1.7583 | -0.6378 | 129 | C | 54.1155  | 0.7663  | -2.3112 | 174 | H | 58.8562 | 3.6788  | -4.3132 |
| 85 | H | -5.2789  | 2.1759  | 1.4349  | 130 | S | 53.2379  | -0.6127 | -3.0009 | 175 | H | 55.4100 | -3.1496 | -1.4187 |
| 86 | H | -5.8584  | -2.2076 | -0.9541 | 131 | C | 57.5532  | 2.3168  | -2.4218 | 176 | H | 55.1751 | -1.6138 | -0.5437 |
| 87 | H | -2.5473  | 1.7344  | 1.1162  | 132 | C | 56.1773  | 2.1489  | -2.3801 | 177 | H | 63.6854 | 3.4243  | -1.4772 |
| 88 | H | -21.4108 | -2.1018 | -0.1540 | 133 | C | 55.5756  | 0.8805  | -2.3812 | 178 | H | 63.1176 | -0.9335 | -3.9132 |
| 89 | H | -22.9542 | -0.2921 | 0.9223  | 134 | C | 58.4191  | 1.2066  | -2.4871 | 179 | H | 66.4297 | 2.9828  | -1.7888 |
| 90 | H | -18.0851 | 1.7844  | 2.0041  | 135 | C | 57.8176  | -0.0615 | -2.4889 | 180 | H | 67.9793 | 1.1703  | -2.8515 |
| 91 | H | -18.6680 | -2.5513 | -0.4674 | 136 | C | 56.4415  | -0.2294 | -2.4475 | 181 | H | 60.3937 | -0.4913 | -3.6005 |
| 92 | H | -15.3628 | 1.3345  | 1.6892  | 137 | O | 58.0645  | 3.5953  | -2.3775 | 182 | H | 47.5796 | -0.9320 | -3.0208 |
| 93 | H | -13.3989 | 1.7976  | 0.6039  | 138 | O | 55.9285  | -1.5073 | -2.4930 | 183 | H | 50.8776 | 3.0375  | -0.9822 |
| 94 | H | -10.5457 | -2.2055 | 0.4207  | 139 | C | 44.4670  | 0.8618  | -1.9427 | 184 | H | 50.3127 | -1.3667 | -3.3364 |
| 95 | H | -10.3678 | 3.9910  | -0.4720 | 140 | C | 36.8939  | -0.0045 | -2.1099 | 185 | H | 53.5991 | 2.5951  | -1.2957 |
| 96 | H | -10.1387 | 2.4607  | -1.3580 | 141 | C | 36.0324  | 0.9222  | -1.5918 | 186 | H | 55.5641 | 3.0410  | -2.3577 |
| 97 | H | -13.6026 | -4.3849 | 1.5044  | 142 | S | 36.9033  | 2.3140  | -0.9199 | 187 | H | 58.4319 | -0.9529 | -2.5117 |
| 98 | H | -13.8417 | -2.8447 | 2.3701  | 143 | C | 39.7056  | 2.1336  | -1.0982 | 188 | H | 36.5568 | -0.9133 | -2.5909 |
| 99 | H | 13.4326  | 4.3579  | -1.5326 | 144 | C | 40.8302  | 1.4095  | -1.5197 | 189 | H | 39.8251 | 3.0897  | -0.6019 |

continues



## D<sub>2</sub> geometry continuation

|     |   |         |         |         |     |   |         |         |         |     |   |         |         |         |
|-----|---|---------|---------|---------|-----|---|---------|---------|---------|-----|---|---------|---------|---------|
| 190 | H | 39.2797 | -1.3406 | -2.9112 | 196 | H | 31.7042 | 2.6106  | -1.3959 | 202 | H | 58.6112 | 5.2242  | -3.4583 |
| 191 | H | 42.5602 | 2.6669  | -0.9192 | 197 | H | 34.6031 | -1.3623 | -1.5036 | 203 | H | 57.2080 | 4.3477  | -4.1282 |
| 192 | H | 23.7578 | -1.4317 | -1.9602 | 198 | H | 34.7093 | 4.8102  | -2.5416 | 204 | H | 56.8220 | -2.2740 | -0.7667 |
| 193 | H | 27.0243 | 2.5920  | 0.0040  | 199 | H | 34.9573 | 3.2602  | -3.3874 | 205 | H | 33.3050 | 3.9116  | -3.1790 |
| 194 | H | 26.4825 | -1.8508 | -2.2814 | 200 | H | 31.6003 | -3.5623 | -0.3563 | 206 | H | 33.0056 | -2.6639 | 0.2788  |
| 195 | H | 29.7489 | 2.1657  | -0.3163 | 201 | H | 31.3536 | -2.0126 | 0.4903  |     |   |         |         |         |

## 13) E<sub>1</sub>

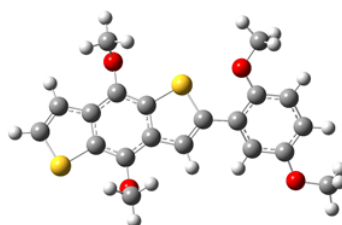

|    |   |         |        |         |    |   |         |        |         |    |   |         |        |         |
|----|---|---------|--------|---------|----|---|---------|--------|---------|----|---|---------|--------|---------|
| 1  | C | -1.9928 | 1.1391 | -2.7954 | 16 | C | -9.0540 | 7.3689 | -6.8937 | 31 | C | -4.9141 | 3.4728 | 0.2317  |
| 2  | H | -1.8891 | 1.0972 | -3.8785 | 17 | S | -8.8330 | 8.1340 | -5.3326 | 32 | C | -4.3015 | 2.8872 | 1.3413  |
| 3  | H | -1.0408 | 1.4530 | -2.3532 | 18 | O | -7.3798 | 7.6347 | -2.5940 | 33 | O | -3.0188 | 2.0870 | -2.5425 |
| 4  | H | -2.2631 | 0.1473 | -2.4170 | 19 | O | -6.7446 | 3.7114 | -6.5565 | 34 | O | -4.8295 | 3.2274 | 2.5579  |
| 5  | C | -4.2660 | 2.6428 | 3.7221  | 20 | H | -8.4480 | 5.5659 | -7.9009 | 35 | H | -1.9733 | 1.0467 | -0.2784 |
| 6  | H | -4.8345 | 3.0408 | 4.5612  | 21 | H | -9.6805 | 7.8546 | -7.6271 | 36 | H | -5.7640 | 4.1194 | 0.4066  |
| 7  | H | -3.2110 | 2.9162 | 3.8387  | 22 | C | -5.7863 | 5.1197 | -2.1099 | 37 | C | -5.6446 | 3.9146 | -7.4530 |
| 8  | H | -4.3592 | 1.5509 | 3.7079  | 23 | C | -5.1536 | 3.9108 | -2.1881 | 38 | H | -4.6941 | 3.9304 | -6.9101 |
| 9  | C | -6.8874 | 4.6864 | -5.5937 | 24 | S | -5.3351 | 3.1835 | -3.7966 | 39 | H | -5.6548 | 3.0732 | -8.1453 |
| 10 | C | -7.6659 | 5.8282 | -5.8331 | 25 | H | -5.7912 | 5.7247 | -1.2143 | 40 | H | -5.7593 | 4.8500 | -8.0105 |
| 11 | C | -7.8042 | 6.8074 | -4.8093 | 26 | H | -2.7433 | 1.5303 | 1.9843  | 41 | C | -6.3296 | 8.6076 | -2.5065 |
| 12 | C | -7.1986 | 6.6764 | -3.5655 | 27 | C | -3.4062 | 2.3186 | -1.2530 | 42 | H | -5.3724 | 8.1341 | -2.2660 |
| 13 | C | -6.4567 | 5.5117 | -3.3126 | 28 | C | -2.8002 | 1.7313 | -0.1479 | 43 | H | -6.2337 | 9.1643 | -3.4442 |
| 14 | C | -6.3127 | 4.5353 | -4.3365 | 29 | C | -3.2376 | 2.0104 | 1.1508  | 44 | H | -6.6114 | 9.2898 | -1.7050 |
| 15 | C | -8.4028 | 6.1867 | -7.0168 | 30 | C | -4.4834 | 3.2218 | -1.0733 |    |   |         |        |         |

## 14) E<sub>2</sub>

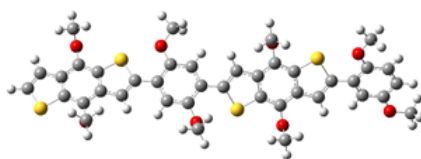

|    |   |         |        |         |    |   |         |        |         |    |   |          |         |         |
|----|---|---------|--------|---------|----|---|---------|--------|---------|----|---|----------|---------|---------|
| 1  | C | -3.5812 | 1.6723 | -3.1090 | 11 | S | 5.8216  | 1.3435 | 0.6611  | 21 | C | -2.3289  | 2.4075  | 1.4656  |
| 2  | C | -4.0324 | 1.8057 | 4.0555  | 12 | O | 3.0800  | 1.2926 | 2.1987  | 22 | C | -3.6545  | 2.5645  | 1.8439  |
| 3  | C | 2.9194  | 1.8363 | -1.9982 | 13 | O | 2.8613  | 2.0346 | -3.3597 | 23 | O | -2.6036  | 1.7308  | -2.0792 |
| 4  | C | 4.1500  | 1.6814 | -1.3438 | 14 | C | 0.4772  | 1.7079 | 0.7455  | 24 | O | -3.9351  | 2.9092  | 3.1502  |
| 5  | C | 4.1736  | 1.4917 | 0.0664  | 15 | C | -0.5228 | 1.9230 | -0.1645 | 25 | C | 2.7927   | 0.8294  | -4.1330 |
| 6  | C | 3.0164  | 1.4578 | 0.8337  | 16 | S | 0.1249  | 2.0481 | -1.8162 | 26 | C | 2.9438   | -0.0646 | 2.6417  |
| 7  | C | 1.7881  | 1.6501 | 0.1808  | 17 | C | -2.9871 | 1.9910 | -0.7989 | 27 | C | -16.2338 | 0.8191  | 0.7547  |
| 8  | C | 1.7620  | 1.8337 | -1.2282 | 18 | C | -4.3145 | 2.1627 | -0.4250 | 28 | C | -17.6012 | 7.0075  | 3.8670  |
| 9  | C | 5.4763  | 1.7015 | -1.9014 | 19 | C | -4.6901 | 2.4338 | 0.9034  | 29 | C | -9.7101  | 2.0190  | 0.5598  |
| 10 | C | 6.4423  | 1.5301 | -0.9682 | 20 | C | -1.9441 | 2.1015 | 0.1538  | 30 | C | -8.4463  | 2.3982  | 1.0389  |

continues

## E<sub>2</sub> geometry continuation

|    |   |          |        |         |    |   |          |         |         |    |   |          |         |         |
|----|---|----------|--------|---------|----|---|----------|---------|---------|----|---|----------|---------|---------|
| 31 | C | -8.3493  | 3.2712 | 2.1573  | 50 | O | -16.2820 | 6.5442  | 3.6280  | 69 | H | 3.0257   | -0.0409 | 3.7279  |
| 32 | C | -9.4713  | 3.7770 | 2.8006  | 51 | C | -9.9027  | -0.2108 | -0.2013 | 70 | H | -15.7219 | -0.0294 | 0.3039  |
| 33 | C | -10.7353 | 3.4311 | 2.2952  | 52 | C | -9.3798  | 4.0021  | 5.1527  | 71 | H | -16.8570 | 0.4666  | 1.5842  |
| 34 | C | -10.8322 | 2.5524 | 1.1814  | 53 | H | -3.0296  | 1.4751  | -4.0264 | 72 | H | -16.8668 | 1.3029  | 0.0026  |
| 35 | C | -7.1569  | 2.0309 | 0.5428  | 54 | H | -4.2957  | 0.8607  | -2.9343 | 73 | H | -17.4942 | 7.9854  | 4.3339  |
| 36 | C | -6.1115  | 2.5774 | 1.2346  | 55 | H | -4.1189  | 2.6212  | -3.2043 | 74 | H | -18.1460 | 6.3416  | 4.5466  |
| 37 | S | -6.6754  | 3.5945 | 2.5776  | 56 | H | -4.2498  | 2.2290  | 5.0355  | 75 | H | -18.1668 | 7.1136  | 2.9339  |
| 38 | O | -9.3450  | 4.6375 | 3.8681  | 57 | H | -3.0888  | 1.2510  | 4.0978  | 76 | H | -7.0285  | 1.3782  | -0.3093 |
| 39 | O | -9.8287  | 1.1828 | -0.5293 | 58 | H | -4.8408  | 1.1272  | 3.7638  | 77 | H | -12.1498 | 4.5466  | 3.5683  |
| 40 | C | -12.0229 | 3.8627 | 2.7414  | 59 | H | 5.6760   | 1.8591  | -2.9521 | 78 | H | -18.2001 | 4.7535  | 2.8029  |
| 41 | C | -13.0692 | 3.3520 | 2.0246  | 60 | H | 7.5111   | 1.5148  | -1.1207 | 79 | H | -17.6890 | 2.6211  | 1.7358  |
| 42 | S | -12.5042 | 2.2623 | 0.7398  | 61 | H | 0.3038   | 1.6035  | 1.8067  | 80 | H | -14.0230 | 5.6242  | 3.0762  |
| 43 | C | -15.5559 | 2.8684 | 1.8062  | 62 | H | -5.0887  | 2.1158  | -1.1763 | 81 | H | -10.7686 | -0.4218 | 0.4341  |
| 44 | C | -16.8701 | 3.2615 | 2.0331  | 63 | H | -1.5764  | 2.5657  | 2.2269  | 82 | H | -10.0083 | -0.7427 | -1.1466 |
| 45 | C | -17.1651 | 4.4815 | 2.6475  | 64 | H | 1.8972   | 0.2511  | -3.8836 | 83 | H | -8.9913  | -0.5442 | 0.3065  |
| 46 | C | -14.4853 | 3.7093 | 2.2022  | 65 | H | 2.7466   | 1.1381  | -5.1770 | 84 | H | -10.3342 | 3.4900  | 5.3136  |
| 47 | C | -14.8060 | 4.9314 | 2.7985  | 66 | H | 3.6803   | 0.2081  | -3.9739 | 85 | H | -8.5607  | 3.2835  | 5.2584  |
| 48 | C | -16.1252 | 5.3228 | 3.0333  | 67 | H | 1.9703   | -0.4763 | 2.3560  | 86 | H | -9.2634  | 4.7962  | 5.8897  |
| 49 | O | -15.2101 | 1.6892 | 1.2106  | 68 | H | 3.7381   | -0.6952 | 2.2297  |    |   |          |         |         |

## 15) E<sub>3</sub>

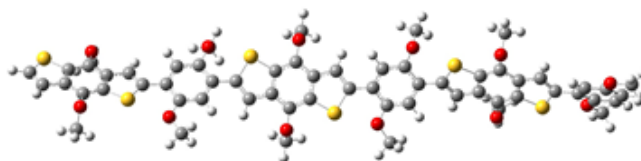

|    |   |         |          |         |    |   |         |         |         |    |   |         |          |         |
|----|---|---------|----------|---------|----|---|---------|---------|---------|----|---|---------|----------|---------|
| 1  | C | 6.5248  | -5.0996  | 11.5607 | 21 | C | 11.1673 | -6.2711 | 11.8960 | 41 | C | 11.0187 | -0.7753  | 2.6037  |
| 2  | C | 13.6652 | -4.7438  | 10.7560 | 22 | C | 11.4598 | -5.6099 | 10.7111 | 42 | S | 9.7721  | -0.2672  | 3.7650  |
| 3  | C | 8.0771  | -9.0860  | 16.6093 | 23 | O | 7.6147  | -5.6822 | 12.2624 | 43 | C | 10.5869 | 1.0239   | 0.8570  |
| 4  | C | 8.8080  | -9.6122  | 17.6843 | 24 | O | 12.7406 | -5.6853 | 10.2037 | 44 | C | 10.7218 | 1.4798   | -0.4485 |
| 5  | C | 10.2006 | -9.3371  | 17.7854 | 25 | C | 5.8752  | -8.4069 | 17.1390 | 45 | C | 11.3883 | 0.7335   | -1.4380 |
| 6  | C | 10.8776 | -8.5647  | 16.8501 | 26 | C | 12.5705 | -7.1297 | 17.6657 | 46 | C | 11.1107 | -0.2348  | 1.2430  |
| 7  | C | 10.1514 | -8.0713  | 15.7546 | 27 | C | 9.3285  | 2.9681  | 1.5071  | 47 | C | 11.7389 | -0.9846  | 0.2408  |
| 8  | C | 8.7591  | -8.3392  | 15.6557 | 28 | C | 13.9026 | -1.3194 | -2.0173 | 48 | C | 11.8854 | -0.5251  | -1.0608 |
| 9  | C | 8.3512  | -10.4541 | 18.7581 | 29 | C | 9.7835  | -1.6902 | 6.1881  | 49 | O | 9.9416  | 1.7271   | 1.8286  |
| 10 | C | 9.3392  | -10.7886 | 19.6215 | 30 | C | 10.3485 | -2.7101 | 6.9702  | 50 | O | 12.4726 | -1.3509  | -1.9970 |
| 11 | S | 10.9029 | -10.1197 | 19.1946 | 31 | C | 11.4740 | -3.4309 | 6.4837  | 51 | C | 9.0063  | 0.2104   | 7.3593  |
| 12 | O | 12.2298 | -8.3356  | 16.9679 | 32 | C | 12.0396 | -3.1688 | 5.2428  | 52 | C | 14.3941 | -3.3250  | 5.0908  |
| 13 | O | 6.7315  | -9.3447  | 16.4735 | 33 | C | 11.4473 | -2.1782 | 4.4420  | 53 | H | 5.6444  | -5.2982  | 12.1692 |
| 14 | C | 10.6224 | -7.3047  | 14.6443 | 34 | C | 10.3281 | -1.4511 | 4.9328  | 54 | H | 6.6538  | -4.0173  | 11.4524 |
| 15 | C | 9.6574  | -6.9862  | 13.7278 | 35 | C | 9.9366  | -3.1793 | 8.2560  | 55 | H | 6.3954  | -5.5548  | 10.5734 |
| 16 | S | 8.0684  | -7.6158  | 14.2162 | 36 | C | 10.6973 | -4.2020 | 8.7518  | 56 | H | 14.6209 | -4.9265  | 10.2661 |
| 17 | C | 8.8666  | -5.6227  | 11.7301 | 37 | S | 12.0064 | -4.6449 | 7.6354  | 57 | H | 13.7749 | -4.8901  | 11.8359 |
| 18 | C | 9.1554  | -4.9712  | 10.5374 | 38 | O | 13.1155 | -3.8965 | 4.7853  | 58 | H | 13.3448 | -3.7152  | 10.5595 |
| 19 | C | 10.4567 | -4.9274  | 10.0033 | 39 | O | 8.6873  | -0.9854 | 6.6355  | 59 | H | 7.3307  | -10.7989 | 18.8489 |
| 20 | C | 9.8842  | -6.2895  | 12.4564 | 40 | C | 11.8055 | -1.7685 | 3.1216  | 60 | H | 9.2647  | -11.4132 | 20.4991 |

continues

### E<sub>3</sub> geometry continuation

|    |   |         |         |         |     |   |         |         |          |     |   |         |         |          |
|----|---|---------|---------|---------|-----|---|---------|---------|----------|-----|---|---------|---------|----------|
| 61 | H | 11.6586 | -7.0170 | 14.5402 | 84  | H | 14.5398 | -3.2392 | 6.1724   | 107 | C | 10.6367 | 4.5821  | -12.7572 |
| 62 | H | 8.3572  | -4.5036 | 9.9805  | 85  | H | 15.1393 | -4.0043 | 4.6779   | 108 | O | 12.2752 | 7.0620  | -9.8368  |
| 63 | H | 11.9698 | -6.8204 | 12.3709 | 86  | C | 12.6604 | 8.3939  | -10.1375 | 109 | O | 10.0722 | 3.6721  | -13.6077 |
| 64 | H | 6.0200  | -7.3946 | 16.7482 | 87  | C | 9.8766  | 4.0519  | -14.9604 | 110 | C | 12.7181 | 5.8586  | -4.1719  |
| 65 | H | 4.8541  | -8.7307 | 16.9398 | 88  | C | 11.5259 | 4.0962  | -5.2012  | 111 | C | 13.0238 | 0.0225  | -7.7127  |
| 66 | H | 6.0550  | -8.4069 | 18.2192 | 89  | C | 11.5445 | 2.8627  | -4.5314  | 112 | H | 13.0226 | 8.8157  | -9.2015  |
| 67 | H | 12.1801 | -6.2496 | 17.1443 | 90  | C | 11.6160 | 1.6554  | -5.2795  | 113 | H | 13.4653 | 8.4192  | -10.8807 |
| 68 | H | 12.1844 | -7.1446 | 18.6899 | 91  | C | 11.6589 | 1.6467  | -6.6677  | 114 | H | 11.8119 | 8.9857  | -10.4984 |
| 69 | H | 13.6591 | -7.0874 | 17.6889 | 92  | C | 11.5960 | 2.8787  | -7.3390  | 115 | H | 9.4162  | 3.1939  | -15.4477 |
| 70 | H | 8.8675  | 3.3154  | 2.4299  | 93  | C | 11.5345 | 4.0863  | -6.5904  | 116 | H | 10.8269 | 4.2809  | -15.4570 |
| 71 | H | 10.0684 | 3.7031  | 1.1727  | 94  | C | 11.4853 | 2.6097  | -3.1257  | 117 | H | 9.2072  | 4.9161  | -15.0441 |
| 72 | H | 8.5583  | 2.8466  | 0.7384  | 95  | C | 11.5157 | 1.2840  | -2.7912  | 118 | H | 11.4173 | 3.4050  | -2.3969  |
| 73 | H | 14.2153 | -2.0155 | -2.7947 | 96  | S | 11.6358 | 0.2482  | -4.2294  | 119 | H | 11.5878 | 2.3313  | -9.4768  |
| 74 | H | 14.3148 | -1.6388 | -1.0540 | 97  | O | 11.7037 | 0.4603  | -7.3651  | 120 | H | 10.9501 | 6.2266  | -14.1280 |
| 75 | H | 14.2714 | -0.3161 | -2.2557 | 98  | O | 11.4481 | 5.2784  | -4.4971  | 121 | H | 11.9144 | 7.6956  | -12.4371 |
| 76 | H | 9.0910  | -2.7589 | 8.7817  | 99  | C | 11.5659 | 3.1275  | -8.7466  | 122 | H | 10.4121 | 3.1767  | -11.1792 |
| 77 | H | 12.6241 | -2.2207 | 2.5804  | 100 | C | 11.4906 | 4.4499  | -9.0841  | 123 | H | 13.2901 | 6.0899  | -5.0760  |
| 78 | H | 10.2802 | 2.4240  | -0.7303 | 101 | S | 11.4757 | 5.4879  | -7.6425  | 124 | H | 12.5043 | 6.7811  | -3.6324  |
| 79 | H | 12.0989 | -1.9814 | 0.4600  | 102 | C | 11.7472 | 6.2833  | -10.8265 | 125 | H | 13.3046 | 5.1888  | -3.5340  |
| 80 | H | 9.5729  | 0.9099  | 6.7365  | 103 | C | 11.6007 | 6.7033  | -12.1438 | 126 | H | 13.5230 | 0.7506  | -8.3604  |
| 81 | H | 8.0548  | 0.6624  | 7.6384  | 104 | C | 11.0516 | 5.8618  | -13.1151 | 127 | H | 13.6321 | -0.1431 | -6.8176  |
| 82 | H | 9.5821  | -0.0184 | 8.2623  | 105 | C | 11.3397 | 4.9791  | -10.4486 | 128 | H | 12.9025 | -0.9188 | -8.2480  |
| 83 | H | 14.5037 | -2.3369 | 4.6314  | 106 | C | 10.7778 | 4.1627  | -11.4331 |     |   |         |         |          |

### 16) F<sub>1</sub>

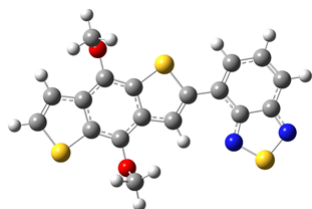

|    |   |         |        |         |    |   |         |        |         |    |   |         |        |         |
|----|---|---------|--------|---------|----|---|---------|--------|---------|----|---|---------|--------|---------|
| 1  | C | -6.3838 | 4.5107 | -5.2528 | 14 | C | -5.3842 | 5.0217 | -1.7441 | 27 | C | -2.7131 | 3.2206 | 1.4673  |
| 2  | C | -7.2882 | 5.5593 | -5.4855 | 15 | C | -4.6158 | 3.8940 | -1.8312 | 28 | C | -3.5232 | 3.8972 | 0.4665  |
| 3  | C | -7.5498 | 6.4999 | -4.4506 | 16 | S | -4.7070 | 3.1623 | -3.4520 | 29 | C | -3.8044 | 3.2588 | -0.7982 |
| 4  | C | -6.9488 | 6.4224 | -3.1993 | 17 | H | -5.4718 | 5.5919 | -0.8330 | 30 | C | -3.2541 | 2.0011 | -0.9686 |
| 5  | C | -6.0745 | 5.3507 | -2.9546 | 18 | C | -5.0758 | 3.9177 | -7.1355 | 31 | C | -2.4607 | 1.3483 | 0.0156  |
| 6  | C | -5.8079 | 4.4153 | -3.9930 | 19 | H | -4.1263 | 4.0595 | -6.6095 | 32 | N | -2.5367 | 3.9345 | 2.5830  |
| 7  | C | -8.0495 | 5.8475 | -6.6717 | 20 | H | -4.9863 | 3.0834 | -7.8303 | 33 | S | -3.3354 | 5.3489 | 2.3705  |
| 8  | C | -8.8344 | 6.9452 | -6.5378 | 21 | H | -5.3250 | 4.8300 | -7.6867 | 34 | N | -3.9290 | 5.1065 | 0.8596  |
| 9  | S | -8.7183 | 7.7067 | -4.9658 | 22 | C | -6.2970 | 8.3756 | -2.0209 | 35 | H | -1.5826 | 1.4373 | 1.9808  |
| 10 | O | -7.2656 | 7.3360 | -2.2241 | 23 | H | -5.3333 | 7.9639 | -1.7073 | 36 | H | -3.4390 | 1.4678 | -1.8937 |
| 11 | O | -6.1223 | 3.5667 | -6.2192 | 24 | H | -6.1636 | 8.9650 | -2.9337 | 37 | H | -2.0761 | 0.3605 | -0.2109 |
| 12 | H | -8.0146 | 5.2401 | -7.5654 | 25 | H | -6.6962 | 9.0111 | -1.2313 |    |   |         |        |         |
| 13 | H | -9.5061 | 7.3657 | -7.2716 | 26 | C | -2.1817 | 1.9259 | 1.2236  |    |   |         |        |         |

17) F<sub>2</sub>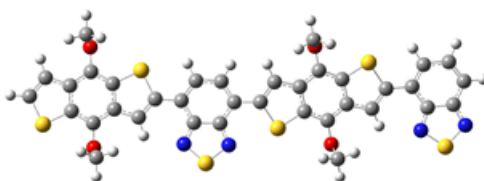

|    |   |          |         |         |    |   |         |         |         |    |   |         |         |         |
|----|---|----------|---------|---------|----|---|---------|---------|---------|----|---|---------|---------|---------|
| 1  | C | -8.7516  | 1.7464  | -0.4301 | 25 | H | -8.4582 | -4.0828 | 1.1322  | 49 | S | 6.7148  | 2.2546  | 0.2212  |
| 2  | C | -9.9244  | 0.9757  | -0.4841 | 26 | C | -0.7731 | 0.0540  | 0.0618  | 50 | C | 3.6491  | 3.5399  | 1.9349  |
| 3  | C | -9.8379  | -0.4385 | -0.3536 | 27 | C | -1.5653 | -1.1212 | 0.2955  | 51 | C | 6.8968  | -0.3162 | -0.2185 |
| 4  | C | -8.6288  | -1.1021 | -0.1798 | 28 | C | -3.0214 | -1.0836 | 0.2501  | 52 | C | 4.9880  | -3.0964 | 0.7301  |
| 5  | C | -7.4526  | -0.3338 | -0.1654 | 29 | C | -3.7221 | 0.1426  | -0.0348 | 53 | C | 7.6846  | 0.7955  | -0.0975 |
| 6  | C | -7.5415  | 1.0810  | -0.2888 | 30 | C | -2.9075 | 1.2411  | -0.2597 | 54 | H | 4.5851  | 3.3136  | 2.4549  |
| 7  | C | -11.2821 | 1.4109  | -0.6743 | 31 | C | -1.4967 | 1.1993  | -0.2221 | 55 | H | 3.4793  | 4.6161  | 1.9424  |
| 8  | C | -12.1668 | 0.3831  | -0.6810 | 32 | N | -1.0806 | -2.3314 | 0.5741  | 56 | H | 2.8208  | 3.0333  | 2.4407  |
| 9  | S | -11.4235 | -1.1873 | -0.4667 | 33 | S | -2.3584 | -3.3372 | 0.7575  | 57 | H | 7.3037  | -1.2919 | -0.4312 |
| 10 | O | -8.5996  | -2.4724 | -0.0938 | 34 | N | -3.5765 | -2.2713 | 0.4996  | 58 | H | 5.9275  | -2.7549 | 1.1747  |
| 11 | O | -8.7888  | 3.1140  | -0.5763 | 35 | H | -3.3647 | 2.1930  | -0.5033 | 59 | H | 4.1948  | -3.0699 | 1.4840  |
| 12 | H | -11.5629 | 2.4448  | -0.8192 | 36 | H | -0.9652 | 2.1140  | -0.4532 | 60 | H | 5.1073  | -4.1144 | 0.3617  |
| 13 | H | -13.2369 | 0.4383  | -0.8161 | 37 | C | 0.6858  | 0.0656  | 0.1169  | 61 | C | 9.1341  | 0.9057  | -0.2171 |
| 14 | C | -6.0973  | -0.7809 | -0.0602 | 38 | C | 1.4740  | 1.1747  | 0.2893  | 62 | C | 9.9963  | -0.2517 | -0.2706 |
| 15 | C | -5.1737  | 0.2286  | -0.0955 | 39 | S | 1.6567  | -1.3987 | -0.1244 | 63 | C | 9.7727  | 2.1312  | -0.2875 |
| 16 | S | -5.9525  | 1.8220  | -0.2646 | 40 | C | 2.8740  | 0.9111  | 0.2161  | 64 | C | 11.4365 | -0.0904 | -0.3945 |
| 17 | H | -5.8151  | -1.8187 | 0.0164  | 41 | H | 1.0768  | 2.1648  | 0.4626  | 65 | N | 9.6217  | -1.5314 | -0.2091 |
| 18 | C | -9.0125  | 3.8429  | 0.6390  | 42 | C | 3.1375  | -0.4663 | -0.0227 | 66 | C | 11.1826 | 2.2788  | -0.4067 |
| 19 | H | -8.2133  | 3.6523  | 1.3623  | 43 | C | 3.9460  | 1.8134  | 0.3422  | 67 | H | 9.1770  | 3.0361  | -0.2633 |
| 20 | H | -9.0133  | 4.8977  | 0.3663  | 44 | C | 4.4284  | -0.9660 | -0.1472 | 68 | C | 12.0235 | 1.2014  | -0.4639 |
| 21 | H | -9.9764  | 3.5782  | 1.0852  | 45 | C | 5.2316  | 1.3189  | 0.1807  | 69 | N | 12.1024 | -1.2484 | -0.4282 |
| 22 | C | -8.4578  | -2.9983 | 1.2343  | 46 | O | 3.7216  | 3.1543  | 0.5544  | 70 | S | 10.9846 | -2.4401 | -0.3096 |
| 23 | H | -7.5182  | -2.6736 | 1.6906  | 47 | C | 5.4979  | -0.0583 | -0.0650 | 71 | H | 11.5888 | 3.2825  | -0.4578 |
| 24 | H | -9.2970  | -2.6886 | 1.8652  | 48 | O | 4.6334  | -2.2985 | -0.4095 | 72 | H | 13.0967 | 1.3021  | -0.5582 |

18) F<sub>3</sub>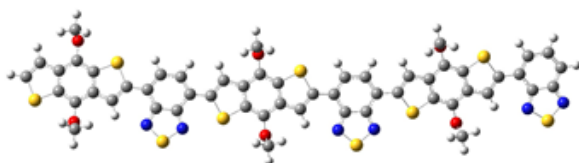

|    |   |          |         |         |    |   |          |         |         |    |   |          |         |         |
|----|---|----------|---------|---------|----|---|----------|---------|---------|----|---|----------|---------|---------|
| 1  | C | -15.0102 | 2.2156  | -0.7587 | 11 | O | -14.9365 | 3.5771  | -0.9409 | 21 | C | -9.2328  | 1.2574  | -0.3614 |
| 2  | C | -16.2390 | 1.5386  | -0.8198 | 12 | C | -12.5790 | -0.5012 | -0.2426 | 22 | C | -7.8333  | 1.1061  | -0.2653 |
| 3  | C | -16.2693 | 0.1274  | -0.6460 | 13 | C | -11.5767 | 0.4297  | -0.2759 | 23 | N | -7.7284  | -2.4390 | 0.5581  |
| 4  | C | -15.1220 | -0.6249 | -0.4238 | 14 | S | -12.2199 | 2.0751  | -0.5151 | 24 | S | -9.0864  | -3.3416 | 0.6909  |
| 5  | C | -13.8898 | 0.0489  | -0.3972 | 15 | C | -15.1229 | 4.3510  | 0.2527  | 25 | N | -10.2052 | -2.1859 | 0.3802  |
| 6  | C | -13.8618 | 1.4614  | -0.5629 | 16 | C | -15.1590 | -2.4735 | 1.0572  | 26 | C | -5.7616  | -0.1936 | 0.1717  |
| 7  | C | -17.5514 | 2.0739  | -1.0611 | 17 | C | -7.2124  | -0.0891 | 0.0552  | 27 | C | -4.8865  | 0.8564  | 0.2895  |
| 8  | C | -18.5146 | 1.1208  | -1.0617 | 18 | C | -8.1049  | -1.1963 | 0.2600  | 28 | S | -4.9110  | -1.7504 | 0.1043  |
| 9  | S | -17.9059 | -0.4972 | -0.7809 | 19 | C | -9.5500  | -1.0462 | 0.1538  | 29 | C | -3.5148  | 0.4727  | 0.3132  |
| 10 | O | -15.2027 | -1.9892 | -0.2934 | 20 | C | -10.1405 | 0.2292  | -0.1634 | 30 | C | -3.3616  | -0.9371 | 0.2058  |

continues

### F<sub>3</sub> geometry continuation

|    |   |          |         |         |    |   |          |         |         |     |   |         |         |         |
|----|---|----------|---------|---------|----|---|----------|---------|---------|-----|---|---------|---------|---------|
| 31 | C | -2.3759  | 1.2928  | 0.4152  | 57 | H | -14.2111 | -2.2163 | 1.5393  | 83  | C | 13.3365 | -0.0175 | -0.4805 |
| 32 | C | -2.1149  | -1.5496 | 0.1881  | 58 | H | -15.9892 | -2.0678 | 1.6442  | 84  | C | 14.0842 | 1.1045  | -0.2523 |
| 33 | C | -1.1327  | 0.6819  | 0.3659  | 59 | H | -15.2527 | -3.5569 | 0.9935  | 85  | S | 13.0697 | 2.4715  | 0.2752  |
| 34 | O | -2.4958  | 2.6602  | 0.5057  | 60 | H | -9.6038  | 2.2407  | -0.6253 | 86  | C | 10.0463 | 3.3947  | 2.2505  |
| 35 | C | -0.9758  | -0.7287 | 0.2510  | 61 | H | -7.2250  | 1.9765  | -0.4755 | 87  | C | 11.5718 | -2.9743 | 0.2142  |
| 36 | O | -2.0107  | -2.9124 | 0.0555  | 62 | H | -5.1983  | 1.8891  | 0.3532  | 88  | C | 18.3866 | 1.7394  | -0.7008 |
| 37 | S | 0.4222   | 1.4930  | 0.4035  | 63 | H | -1.6828  | 2.9110  | 2.4201  | 89  | C | 17.8465 | 0.4324  | -0.8345 |
| 38 | C | -2.5799  | 3.1646  | 1.8468  | 64 | H | -2.6620  | 4.2475  | 1.7605  | 90  | C | 16.4195 | 0.1946  | -0.6891 |
| 39 | C | 0.3983   | -1.1142 | 0.1914  | 65 | H | -3.4623  | 2.7693  | 2.3605  | 91  | C | 15.5221 | 1.2909  | -0.4063 |
| 40 | C | -1.8060  | -3.6260 | 1.2841  | 66 | H | 0.7263   | -2.1352 | 0.0800  | 92  | C | 16.1165 | 2.5343  | -0.2882 |
| 41 | C | 1.2761   | -0.0661 | 0.2641  | 67 | H | -0.8664  | -3.3301 | 1.7606  | 93  | C | 17.5140 | 2.7565  | -0.4304 |
| 42 | C | 2.7291   | -0.0874 | 0.2244  | 68 | H | -2.6364  | -3.4572 | 1.9769  | 94  | N | 18.5487 | -0.6742 | -1.0927 |
| 43 | C | 3.4955   | -1.3076 | 0.2275  | 69 | H | -1.7626  | -4.6813 | 1.0179  | 95  | S | 17.4780 | -1.9111 | -1.1438 |
| 44 | C | 3.4843   | 1.0738  | 0.1744  | 70 | H | 2.9748   | 2.0298  | 0.1470  | 96  | N | 16.0906 | -1.0896 | -0.8402 |
| 45 | C | 4.9515   | -1.2770 | 0.1925  | 71 | H | 5.3711   | 2.0680  | 0.0611  | 97  | H | 7.4642  | 2.0959  | 0.7149  |
| 46 | N | 3.0062   | -2.5480 | 0.2624  | 72 | C | 10.3299  | 1.8920  | 0.4459  | 98  | H | 13.7720 | -0.9410 | -0.8270 |
| 47 | C | 4.8941   | 1.0989  | 0.1328  | 73 | C | 9.2927   | 0.9606  | 0.2559  | 99  | H | 11.0194 | 3.1578  | 2.6916  |
| 48 | C | 5.6813   | -0.0400 | 0.1543  | 74 | C | 9.6015   | -0.3648 | -0.1566 | 100 | H | 9.8269  | 4.4513  | 2.4002  |
| 49 | N | 5.5007   | -2.4908 | 0.1996  | 75 | C | 10.9047  | -0.7846 | -0.3931 | 101 | H | 9.2727  | 2.7874  | 2.7315  |
| 50 | S | 4.2796   | -3.5785 | 0.2444  | 76 | C | 11.9377  | 0.1555  | -0.2414 | 102 | H | 12.5145 | -2.6525 | 0.6673  |
| 51 | H | -17.7420 | 3.1219  | -1.2451 | 77 | C | 11.6263  | 1.4794  | 0.1793  | 103 | H | 10.8043 | -3.0620 | 0.9896  |
| 52 | H | -19.5731 | 1.2553  | -1.2277 | 78 | C | 7.8892   | 1.1495  | 0.4127  | 104 | H | 11.7120 | -3.9396 | -0.2706 |
| 53 | H | -12.3839 | -1.5555 | -0.1298 | 79 | C | 7.1385   | 0.0340  | 0.1405  | 105 | H | 19.4512 | 1.8948  | -0.8138 |
| 54 | H | -14.3572 | 4.1149  | 0.9984  | 80 | S | 8.1580   | -1.3465 | -0.3140 | 106 | H | 15.4931 | 3.3968  | -0.0847 |
| 55 | H | -15.0319 | 5.3954  | -0.0439 | 81 | O | 11.1564  | -2.0663 | -0.8172 | 107 | H | 17.8838 | 3.7696  | -0.3221 |
| 56 | H | -16.1141 | 4.1777  | 0.6839  | 82 | O | 10.0573  | 3.1842  | 0.8307  |     |   |         |         |         |

### 19) G1<sub>1</sub>

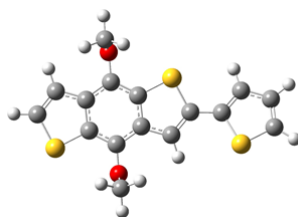

|    |   |         |        |         |    |   |         |        |         |    |   |         |        |         |
|----|---|---------|--------|---------|----|---|---------|--------|---------|----|---|---------|--------|---------|
| 1  | C | -6.1824 | 4.2869 | -4.9305 | 12 | C | -5.5282 | 4.6107 | -1.3198 | 23 | H | -9.1656 | 7.1951 | -7.0809 |
| 2  | C | -7.0829 | 5.3321 | -5.1917 | 13 | C | -4.7295 | 3.5061 | -1.4024 | 24 | H | -5.7409 | 5.1185 | -0.3888 |
| 3  | C | -7.4646 | 6.2050 | -4.1352 | 14 | S | -4.6435 | 2.8698 | -3.0563 | 25 | H | -3.7950 | 3.9530 | -6.0809 |
| 4  | C | -6.9814 | 6.0657 | -2.8383 | 15 | C | -4.6845 | 3.8232 | -6.7054 | 26 | H | -4.5080 | 3.0295 | -7.4306 |
| 5  | C | -6.1090 | 5.0000 | -2.5708 | 16 | C | -6.5410 | 8.0367 | -1.6007 | 27 | H | -5.5404 | 7.7115 | -1.2987 |
| 6  | C | -5.7258 | 4.1290 | -3.6289 | 17 | C | -2.8434 | 1.2260 | 0.8988  | 28 | H | -6.4648 | 8.6654 | -2.4934 |
| 7  | C | -7.7346 | 5.6739 | -6.4283 | 18 | C | -2.8368 | 2.2580 | 1.7937  | 29 | H | -2.3983 | 0.2609 | 1.1010  |
| 8  | C | -8.5561 | 6.7457 | -6.3109 | 19 | S | -3.6308 | 3.6606 | 1.1592  | 30 | H | -3.6254 | 0.8602 | -1.1386 |
| 9  | S | -8.6103 | 7.4153 | -4.6933 | 20 | C | -4.0006 | 2.8373 | -0.3442 | 31 | H | -2.4134 | 2.2857 | 2.7860  |
| 10 | O | -7.3994 | 6.9116 | -1.8375 | 21 | C | -3.5030 | 1.5540 | -0.3171 | 32 | H | -4.8991 | 4.7593 | -7.2306 |
| 11 | O | -5.8078 | 3.4041 | -5.9174 | 22 | H | -7.5997 | 5.1202 | -7.3470 | 33 | H | -7.0001 | 8.6052 | -0.7927 |

20) G1<sub>2</sub>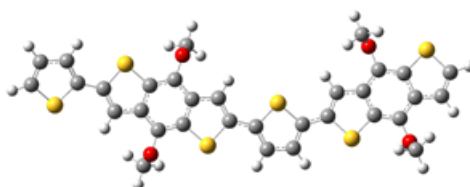

|    |   |         |         |         |    |   |          |         |         |    |   |          |         |         |
|----|---|---------|---------|---------|----|---|----------|---------|---------|----|---|----------|---------|---------|
| 1  | C | 8.0836  | -0.9596 | 0.0783  | 23 | C | -3.1494  | 0.0695  | -0.0972 | 45 | H | 4.0560   | 1.3035  | -0.3156 |
| 2  | C | 8.9069  | 0.1734  | -0.0274 | 24 | C | -3.6228  | -1.2709 | -0.0351 | 46 | H | 8.0534   | -2.6564 | 2.1419  |
| 3  | C | 8.3120  | 1.4600  | -0.1495 | 25 | C | -4.9730  | -1.5860 | 0.0322  | 47 | H | 9.3483   | -3.6492 | 1.4201  |
| 4  | C | 6.9341  | 1.6477  | -0.1744 | 26 | C | -5.8966  | -0.5275 | 0.0698  | 48 | H | 5.2763   | 2.9901  | 1.4414  |
| 5  | C | 6.1129  | 0.5117  | -0.1066 | 27 | C | -5.4237  | 0.8128  | 0.0008  | 49 | H | 6.9152   | 3.6937  | 1.5440  |
| 6  | C | 6.7092  | -0.7744 | 0.0202  | 28 | C | -1.7213  | 0.1307  | -0.1465 | 50 | H | 0.3632   | -3.5409 | -0.4675 |
| 7  | C | 10.3437 | 0.2458  | -0.0497 | 29 | C | -1.1132  | -1.0948 | -0.1219 | 51 | H | 2.9641   | -3.4156 | -0.4566 |
| 8  | C | 10.8042 | 1.5146  | -0.1764 | 30 | S | -2.2930  | -2.4175 | -0.0223 | 52 | H | 9.6962   | -1.9812 | 1.9514  |
| 9  | S | 9.5340  | 2.7151  | -0.2878 | 31 | O | -5.3820  | -2.8961 | 0.1230  | 53 | H | 5.6398   | 4.5330  | 0.6212  |
| 10 | O | 6.3994  | 2.9055  | -0.3249 | 32 | O | -3.6587  | 2.4372  | -0.1384 | 54 | H | -1.1741  | 1.0627  | -0.1895 |
| 11 | O | 8.6161  | -2.2246 | 0.1732  | 33 | C | -7.3207  | -0.5863 | 0.2034  | 55 | H | -7.8633  | -1.5143 | 0.3228  |
| 12 | C | 4.6848  | 0.4351  | -0.1729 | 34 | C | -7.9245  | 0.6395  | 0.2258  | 56 | H | -4.3859  | 2.9391  | -2.0359 |
| 13 | C | 4.1951  | -0.8392 | -0.0936 | 35 | S | -6.7503  | 1.9605  | 0.0781  | 57 | H | -3.1409  | 4.0009  | -1.3251 |
| 14 | S | 5.4924  | -2.0398 | 0.0715  | 36 | C | -3.4572  | 2.9669  | -1.4573 | 58 | H | -6.6129  | -2.9636 | -1.5711 |
| 15 | C | 8.9446  | -2.6410 | 1.5065  | 37 | C | -5.7675  | -3.4950 | -1.1231 | 59 | H | -4.9296  | -3.5038 | -1.8274 |
| 16 | C | 6.0395  | 3.5591  | 0.9013  | 38 | C | -11.3410 | 2.0803  | 0.7725  | 60 | H | -11.9700 | 2.9143  | 1.0537  |
| 17 | C | 0.9141  | -2.6208 | -0.3229 | 39 | C | -11.8319 | 0.8554  | 0.4189  | 61 | H | -9.3495  | 3.0163  | 1.0037  |
| 18 | C | 0.2976  | -1.3996 | -0.1522 | 40 | S | -10.5616 | -0.2545 | 0.0256  | 62 | H | -12.8603 | 0.5334  | 0.3623  |
| 19 | C | 2.8202  | -1.2788 | -0.1398 | 41 | C | -9.3323  | 0.9505  | 0.3607  | 63 | H | -2.6801  | 2.4101  | -1.9904 |
| 20 | C | 2.3258  | -2.5532 | -0.3157 | 42 | C | -9.9210  | 2.1365  | 0.7383  | 64 | H | -6.0602  | -4.5184 | -0.8913 |
| 21 | S | 1.5007  | -0.1377 | 0.0454  | 43 | H | 10.9860  | -0.6221 | 0.0052  |    |   |          |         |         |
| 22 | C | -4.0748 | 1.1269  | -0.0999 | 44 | H | 11.8329  | 1.8390  | -0.2296 |    |   |          |         |         |

21) G1<sub>3</sub>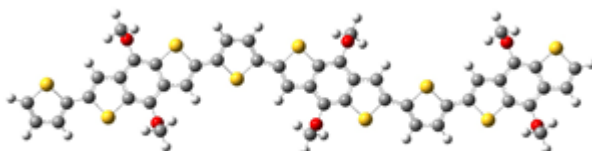

|    |   |         |         |         |    |   |         |         |         |    |   |         |         |         |
|----|---|---------|---------|---------|----|---|---------|---------|---------|----|---|---------|---------|---------|
| 1  | C | 14.0295 | -1.3143 | 0.1818  | 13 | C | 10.1645 | -0.9774 | -0.1403 | 25 | C | 0.9772  | -1.2419 | -0.1140 |
| 2  | C | 14.9153 | -0.2260 | 0.1319  | 14 | S | 11.3866 | -2.2507 | 0.0557  | 26 | C | 0.1094  | -0.1366 | -0.1097 |
| 3  | C | 14.3965 | 1.0923  | 0.0081  | 15 | C | 14.7132 | -3.0590 | 1.6251  | 27 | C | 0.6489  | 1.1752  | -0.2214 |
| 4  | C | 13.0335 | 1.3557  | -0.0719 | 16 | C | 12.2208 | 3.2966  | 1.0111  | 28 | C | 4.3090  | 0.3029  | -0.3523 |
| 5  | C | 12.1508 | 0.2651  | -0.0538 | 17 | C | 6.8036  | -2.5665 | -0.5390 | 29 | C | 4.8546  | -0.9497 | -0.2927 |
| 6  | C | 12.6708 | -1.0530 | 0.0741  | 18 | C | 6.2482  | -1.3257 | -0.3136 | 30 | S | 3.6111  | -2.2087 | -0.1479 |
| 7  | C | 16.3530 | -0.2328 | 0.1679  | 19 | C | 8.7702  | -1.3394 | -0.2431 | 31 | O | 0.4987  | -2.5242 | 0.0153  |
| 8  | C | 16.8862 | 1.0094  | 0.0820  | 20 | C | 8.2154  | -2.5743 | -0.4992 | 32 | O | 2.4947  | 2.7016  | -0.4184 |
| 9  | S | 15.6887 | 2.2807  | -0.0599 | 21 | S | 7.5085  | -0.1425 | -0.0171 | 33 | C | -1.3132 | -0.1203 | 0.0288  |
| 10 | O | 12.5722 | 2.6424  | -0.2174 | 22 | C | 2.0108  | 1.4176  | -0.3328 | 34 | C | -1.8566 | 1.1347  | 0.0112  |
| 11 | O | 14.4907 | -2.6062 | 0.2816  | 23 | C | 2.8806  | 0.3144  | -0.3006 | 35 | S | -0.6166 | 2.3915  | -0.1755 |
| 12 | C | 10.7254 | 0.2681  | -0.1808 | 24 | C | 2.3408  | -0.9978 | -0.1971 | 36 | C | 2.6972  | 3.1763  | -1.7584 |

continues

### G1<sub>3</sub> geometry continuation

|    |   |         |         |         |    |   |          |         |         |    |   |          |         |         |
|----|---|---------|---------|---------|----|---|----------|---------|---------|----|---|----------|---------|---------|
| 37 | C | 0.1147  | -3.1487 | -1.2191 | 57 | H | 3.0757   | 4.1936  | -1.6668 | 77 | S | -12.6859 | -2.0755 | 0.0679  |
| 38 | C | -5.1901 | 2.7680  | 0.4527  | 58 | H | -0.6972  | -2.5973 | -1.7037 | 78 | C | -9.3777  | -2.9270 | 1.6371  |
| 39 | C | -5.7653 | 1.5374  | 0.2210  | 59 | H | 0.9651   | -3.2193 | -1.9044 | 79 | C | -11.8801 | 3.4388  | 1.1654  |
| 40 | S | -4.5249 | 0.3387  | -0.0958 | 60 | H | -5.7713  | 3.6528  | 0.6767  | 80 | C | -17.2658 | -2.3610 | -0.6640 |
| 41 | C | -3.2438 | 1.5154  | 0.1296  | 61 | H | -3.1675  | 3.6300  | 0.5829  | 81 | C | -17.8004 | -1.1568 | -0.3066 |
| 42 | C | -3.7789 | 2.7559  | 0.4012  | 62 | H | 3.4295   | 2.5584  | -2.2876 | 82 | S | -16.5719 | -0.0032 | 0.0942  |
| 43 | H | 16.9420 | -1.1370 | 0.2330  | 63 | H | -0.2282  | -4.1496 | -0.9598 | 83 | C | -15.3006 | -1.1616 | -0.2467 |
| 44 | H | 17.9318 | 1.2789  | 0.0760  | 64 | C | -10.0428 | -1.1433 | 0.2328  | 84 | C | -15.8455 | -2.3658 | -0.6296 |
| 45 | H | 10.1526 | 1.1720  | -0.3373 | 65 | C | -9.1568  | -0.0531 | 0.2100  | 85 | H | -7.1488  | -0.9741 | 0.3193  |
| 46 | H | 13.7855 | -3.0385 | 2.2055  | 66 | C | -9.6776  | 1.2677  | 0.1215  | 86 | H | -13.9179 | 1.3523  | -0.2587 |
| 47 | H | 15.0701 | -4.0852 | 1.5456  | 67 | C | -11.0377 | 1.5327  | 0.0437  | 87 | H | -10.3156 | -2.9263 | 2.2011  |
| 48 | H | 11.4073 | 2.7692  | 1.5194  | 68 | C | -11.9216 | 0.4408  | 0.0293  | 88 | H | -9.0160  | -3.9493 | 1.5336  |
| 49 | H | 13.0838 | 3.3642  | 1.6808  | 69 | C | -11.4016 | -0.8796 | 0.1267  | 89 | H | -12.7039 | 2.8938  | 1.6370  |
| 50 | H | 6.2079  | -3.4445 | -0.7511 | 70 | C | -7.7279  | -0.0629 | 0.2558  | 90 | H | -11.0342 | 3.4883  | 1.8582  |
| 51 | H | 8.8127  | -3.4585 | -0.6784 | 71 | C | -7.1645  | 1.1821  | 0.2057  | 91 | H | -17.8641 | -3.2156 | -0.9502 |
| 52 | H | 15.4684 | -2.4457 | 2.1271  | 72 | S | -8.3900  | 2.4606  | 0.0795  | 92 | H | -15.2413 | -3.2216 | -0.9008 |
| 53 | H | 11.8919 | 4.2988  | 0.7389  | 73 | O | -11.4955 | 2.8239  | -0.0732 | 93 | H | -18.8395 | -0.8721 | -0.2486 |
| 54 | H | 4.9009  | 1.2049  | -0.4280 | 74 | O | -9.5777  | -2.4352 | 0.3032  | 94 | H | -8.6334  | -2.3266 | 2.1699  |
| 55 | H | -1.8986 | -1.0175 | 0.1765  | 75 | C | -13.3453 | 0.4464  | -0.1138 | 95 | H | -12.2061 | 4.4478  | 0.9159  |
| 56 | H | 1.7570  | 3.1848  | -2.3186 | 76 | C | -13.9053 | -0.7994 | -0.1119 |    |   |          |         |         |

### 22) G2<sub>1</sub>

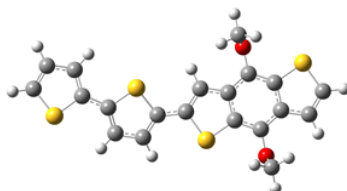

|    |   |         |        |         |    |   |         |        |         |    |   |         |        |         |
|----|---|---------|--------|---------|----|---|---------|--------|---------|----|---|---------|--------|---------|
| 1  | C | -6.4952 | 4.5594 | -5.4399 | 15 | C | -4.8874 | 3.7417 | -1.9883 | 29 | C | -1.9293 | 2.8493 | 4.7424  |
| 2  | C | -7.3598 | 5.6434 | -5.6634 | 16 | S | -4.9250 | 3.0865 | -3.6379 | 30 | C | -1.0206 | 1.8515 | 4.5309  |
| 3  | C | -7.6373 | 6.5457 | -4.5992 | 17 | H | -5.7611 | 5.4151 | -0.9423 | 31 | S | -1.0802 | 1.2673 | 2.9009  |
| 4  | C | -7.0888 | 6.3966 | -3.3299 | 18 | C | -6.4684 | 8.3358 | -2.1186 | 32 | C | -2.3755 | 2.3773 | 2.4931  |
| 5  | C | -6.2551 | 5.2920 | -3.0974 | 19 | H | -5.4840 | 7.9429 | -1.8453 | 33 | C | -2.7003 | 3.1491 | 3.5862  |
| 6  | C | -5.9733 | 4.3935 | -4.1645 | 20 | H | -6.3765 | 8.9526 | -3.0182 | 34 | H | -2.0526 | 3.3488 | 5.6941  |
| 7  | C | -8.0671 | 6.0014 | -6.8642 | 21 | H | -6.8606 | 8.9398 | -1.3012 | 35 | H | -0.3184 | 1.4214 | 5.2283  |
| 8  | C | -8.8293 | 7.1124 | -6.7141 | 22 | C | -2.9544 | 1.4061 | 0.2058  | 36 | H | -3.4866 | 3.8924 | 3.5657  |
| 9  | S | -8.7555 | 7.8028 | -5.1063 | 23 | C | -2.9448 | 2.3964 | 1.1625  | 37 | C | -5.1477 | 4.0183 | -7.3110 |
| 10 | O | -7.4113 | 7.2731 | -2.3202 | 24 | S | -3.7588 | 3.8278 | 0.5607  | 38 | H | -4.2108 | 4.1353 | -6.7572 |
| 11 | O | -6.2192 | 3.6470 | -6.4323 | 25 | C | -4.1369 | 3.0500 | -0.9657 | 39 | H | -5.3756 | 4.9495 | -7.8393 |
| 12 | H | -8.0139 | 5.4304 | -7.7808 | 26 | C | -3.6202 | 1.7731 | -0.9873 | 40 | H | -5.0473 | 3.2056 | -8.0296 |
| 13 | H | -9.4619 | 7.5813 | -7.4532 | 27 | H | -2.5174 | 0.4296 | 0.3690  |    |   |         |        |         |
| 14 | C | -5.6260 | 4.8867 | -1.8763 | 28 | H | -3.7418 | 1.1057 | -1.8305 |    |   |         |        |         |

23) G2<sub>2</sub>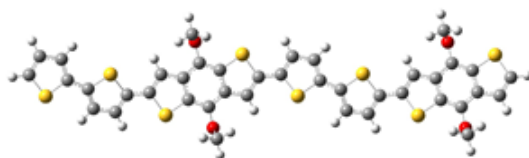

|    |   |         |         |          |    |   |         |         |          |    |   |        |         |         |
|----|---|---------|---------|----------|----|---|---------|---------|----------|----|---|--------|---------|---------|
| 1  | C | -5.4508 | 2.4111  | -10.0020 | 27 | H | -6.8653 | 3.0994  | -12.4609 | 53 | S | 4.9031 | -3.3267 | 4.7159  |
| 2  | C | -6.5985 | 3.1800  | -10.2540 | 28 | H | -8.9954 | 4.5867  | -12.1628 | 54 | C | 2.2070 | 1.4823  | 6.0795  |
| 3  | C | -7.3012 | 3.7642  | -9.1643  | 29 | H | -5.6300 | 2.7432  | -5.3825  | 55 | C | 7.0485 | -4.5013 | 8.6553  |
| 4  | C | -6.9010 | 3.6019  | -7.8425  | 30 | H | -6.1308 | 5.3954  | -6.0130  | 56 | C | 6.8436 | -3.4986 | 9.5760  |
| 5  | C | -5.7726 | 2.8072  | -7.5897  | 31 | H | -7.2055 | 6.1751  | -7.2080  | 57 | S | 5.7820 | -2.2724 | 8.9119  |
| 6  | C | -5.0681 | 2.2267  | -8.6809  | 32 | H | -7.8237 | 5.7648  | -5.5861  | 58 | C | 5.5933 | -3.1598 | 7.4104  |
| 7  | C | -7.2283 | 3.4724  | -11.5134 | 33 | H | -1.0974 | -1.0864 | -4.0494  | 59 | C | 6.3499 | -4.3102 | 7.4412  |
| 8  | C | -8.3381 | 4.2377  | -11.3806 | 34 | H | -2.2117 | -0.5300 | -6.3388  | 60 | C | 7.6658 | -2.7604 | 13.1565 |
| 9  | S | -8.7112 | 4.6531  | -9.7198  | 35 | H | -2.2015 | 1.1252  | 1.5085   | 61 | C | 8.7806 | -3.5280 | 12.9791 |
| 10 | O | -7.6216 | 4.1608  | -6.8137  | 36 | H | -3.4444 | 1.5236  | -0.7469  | 62 | S | 8.8864 | -4.1392 | 11.3612 |
| 11 | O | -4.7531 | 1.8122  | -11.0250 | 37 | H | -2.9990 | 2.9496  | -10.9044 | 63 | C | 7.3788 | -3.3631 | 10.9140 |
| 12 | C | -5.2023 | 2.4419  | -6.3291  | 38 | H | -4.2043 | 3.5330  | -12.0862 | 64 | C | 6.8675 | -2.6662 | 11.9849 |
| 13 | C | -4.1060 | 1.6324  | -6.4324  | 39 | H | -3.2865 | 2.0375  | -12.4100 | 65 | C | 4.6312 | -2.5006 | 1.0515  |
| 14 | S | -3.7083 | 1.2650  | -8.1238  | 40 | C | 3.1083  | -2.2516 | 2.8451   | 66 | H | 1.5118 | -1.7884 | 0.4695  |
| 15 | C | -7.1575 | 5.4508  | -6.3888  | 41 | C | 2.0379  | -1.3811 | 2.5785   | 67 | H | 3.4889 | -1.2120 | 7.3453  |
| 16 | C | -1.7975 | -0.2736 | -4.1909  | 42 | C | 1.5354  | -0.5533 | 3.6206   | 68 | H | 3.2474 | 1.3229  | 6.3799  |
| 17 | C | -2.2146 | 0.5385  | -3.1584  | 43 | C | 2.0588  | -0.5668 | 4.9058   | 69 | H | 2.1815 | 2.0856  | 5.1666  |
| 18 | S | -3.3655 | 1.7241  | -3.7469  | 44 | C | 3.1088  | -1.4594 | 5.1803   | 70 | H | 1.6732 | 2.0019  | 6.8743  |
| 19 | C | -3.2984 | 1.0727  | -5.3742  | 45 | C | 3.6130  | -2.2853 | 4.1375   | 71 | H | 7.6615 | -5.3686 | 8.8624  |
| 20 | C | -2.4029 | 0.0271  | -5.4311  | 46 | C | 1.3107  | -1.2084 | 1.3599   | 72 | H | 6.3752 | -5.0159 | 6.6212  |
| 21 | C | -1.8109 | 0.8129  | 0.5489   | 47 | C | 0.3037  | -0.2866 | 1.4423   | 73 | H | 7.4145 | -2.2858 | 14.0957 |
| 22 | C | -0.6245 | 0.1245  | 0.4163   | 48 | S | 0.1934  | 0.4318  | 3.0623   | 74 | H | 9.5501 | -3.7735 | 13.6944 |
| 23 | S | -0.3178 | -0.2318 | -1.2740  | 49 | O | 1.5267  | 0.2326  | 5.8900   | 75 | H | 5.9316 | -2.1252 | 11.9374 |
| 24 | C | -1.8251 | 0.5161  | -1.7692  | 50 | O | 3.6079  | -3.0844 | 1.8718   | 76 | H | 5.4949 | -2.2024 | 1.6540  |
| 25 | C | -2.4840 | 1.0306  | -0.6735  | 51 | C | 3.7687  | -1.7055 | 6.4246   | 77 | H | 4.2507 | -1.6305 | 0.5071  |
| 26 | C | -3.7545 | 2.6429  | -11.6346 | 52 | C | 4.7439  | -2.6615 | 6.3541   | 78 | H | 4.9303 | -3.2722 | 0.3431  |

24) G2<sub>2</sub>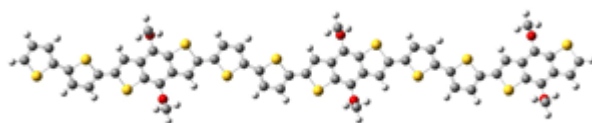

|    |   |         |         |         |    |   |         |         |         |    |   |         |         |         |
|----|---|---------|---------|---------|----|---|---------|---------|---------|----|---|---------|---------|---------|
| 1  | C | 11.1754 | -1.4023 | 0.8637  | 11 | O | 11.4250 | -2.6935 | 1.2668  | 21 | C | 0.4689  | 1.6121  | -0.9731 |
| 2  | C | 12.2204 | -0.4865 | 0.6606  | 12 | C | 8.1783  | 0.5099  | -0.0920 | 22 | C | -0.2814 | 0.5286  | -0.5704 |
| 3  | C | 11.9183 | 0.8325  | 0.2231  | 13 | C | 7.4302  | -0.6057 | 0.1601  | 23 | S | 0.7706  | -0.7837 | -0.0713 |
| 4  | C | 10.6182 | 1.2604  | -0.0218 | 14 | S | 8.4290  | -1.9633 | 0.7194  | 24 | C | 2.2100  | 0.1397  | -0.4607 |
| 5  | C | 9.5777  | 0.3351  | 0.1509  | 15 | C | 10.0636 | 3.4853  | 0.5619  | 25 | C | 1.8630  | 1.3943  | -0.9137 |
| 6  | C | 9.8806  | -0.9827 | 0.5931  | 16 | C | 3.8913  | -1.7578 | -0.2097 | 26 | C | 11.5173 | -2.8697 | 2.6879  |
| 7  | C | 13.6363 | -0.6870 | 0.8134  | 17 | C | 3.5229  | -0.4318 | -0.2819 | 27 | C | -4.9093 | -1.4727 | -0.3284 |
| 8  | C | 14.3587 | 0.4191  | 0.5141  | 18 | S | 4.9313  | 0.5989  | -0.1073 | 28 | C | -3.8709 | -0.5287 | -0.4032 |
| 9  | S | 13.3804 | 1.7840  | 0.0139  | 19 | C | 6.0043  | -0.7833 | 0.0158  | 29 | C | -4.1906 | 0.8530  | -0.5161 |
| 10 | O | 10.3689 | 2.5358  | -0.4702 | 20 | C | 5.2800  | -1.9539 | -0.0411 | 30 | C | -5.4973 | 1.3183  | -0.5584 |

continues



G2<sub>3</sub> geometry continuation

|    |   |          |         |         |    |   |          |         |         |     |   |          |         |         |
|----|---|----------|---------|---------|----|---|----------|---------|---------|-----|---|----------|---------|---------|
| 31 | C | -6.5352  | 0.3718  | -0.5145 | 60 | H | 5.7432   | -2.9307 | 0.0053  | 89  | C | -24.0623 | 0.7259  | 0.0610  |
| 32 | C | -6.2156  | -1.0096 | -0.3988 | 61 | H | 0.0236   | 2.5303  | -1.3328 | 90  | C | -24.8116 | -0.4105 | -0.0693 |
| 33 | C | -2.4594  | -0.7542 | -0.4162 | 62 | H | 2.5958   | 2.1267  | -1.2259 | 91  | S | -23.7976 | -1.8529 | -0.2771 |
| 34 | C | -1.7172  | 0.3899  | -0.5201 | 63 | H | 10.5823  | -2.5852 | 3.1809  | 92  | C | -22.0070 | 3.1964  | 1.6133  |
| 35 | S | -2.7403  | 1.8379  | -0.6125 | 64 | H | 12.3406  | -2.2813 | 3.1054  | 93  | C | -28.4101 | -1.3875 | -0.3656 |
| 36 | O | -5.7623  | 2.6606  | -0.6932 | 65 | H | 11.7070  | -3.9298 | 2.8517  | 94  | C | -28.7324 | -0.1568 | 0.1601  |
| 37 | O | -4.6438  | -2.8189 | -0.2426 | 66 | H | -2.0227  | -1.7434 | -0.3925 | 95  | S | -27.2762 | 0.7427  | 0.5370  |
| 38 | C | -7.9450  | 0.5894  | -0.6049 | 67 | H | -8.3795  | 1.5690  | -0.7499 | 96  | C | -26.2493 | -0.5453 | -0.0668 |
| 39 | C | -8.6867  | -0.5585 | -0.5494 | 68 | H | -6.8703  | 2.9457  | 1.0619  | 97  | C | -27.0190 | -1.6060 | -0.4906 |
| 40 | S | -7.6649  | -2.0008 | -0.3822 | 69 | H | -5.1232  | 3.2910  | 1.1989  | 98  | C | -31.7868 | 1.9281  | 0.7641  |
| 41 | C | -5.9969  | 3.3525  | 0.5425  | 70 | H | -6.1812  | 4.3931  | 0.2782  | 99  | C | -32.4711 | 0.7533  | 0.8865  |
| 42 | C | -12.2570 | -1.6185 | -0.8836 | 71 | H | -12.9827 | -2.3932 | -1.0936 | 100 | S | -31.4290 | -0.6178 | 0.6955  |
| 43 | C | -12.6128 | -0.3066 | -0.6550 | 72 | H | -10.4103 | -2.8062 | -1.0513 | 101 | C | -30.0376 | 0.4130  | 0.4191  |
| 44 | S | -11.1823 | 0.6699  | -0.3781 | 73 | H | -16.1410 | 2.7997  | -0.8117 | 102 | C | -30.4043 | 1.7371  | 0.4976  |
| 45 | C | -10.1207 | -0.7057 | -0.6204 | 74 | H | -13.5729 | 2.3900  | -0.9757 | 103 | C | -20.5092 | -3.4279 | 0.6656  |
| 46 | C | -10.8627 | -1.8416 | -0.8624 | 75 | H | -5.3361  | -3.1448 | 1.7070  | 104 | H | -18.1674 | -1.5827 | -0.6344 |
| 47 | C | -15.6826 | 1.8279  | -0.6840 | 76 | H | -3.5852  | -2.8214 | 1.5656  | 105 | H | -24.4947 | 1.7129  | 0.1533  |
| 48 | C | -16.4158 | 0.6821  | -0.4632 | 77 | H | -4.2554  | -4.3757 | 1.0010  | 106 | H | -22.8479 | 2.6886  | 2.0963  |
| 49 | S | -15.3473 | -0.7025 | -0.3250 | 78 | C | -21.0387 | -1.3393 | -0.3121 | 107 | H | -21.0913 | 3.0014  | 2.1803  |
| 50 | C | -13.9277 | 0.2859  | -0.6155 | 79 | C | -19.9971 | -0.3972 | -0.2639 | 108 | H | -22.1961 | 4.2688  | 1.5845  |
| 51 | C | -14.2906 | 1.6064  | -0.7712 | 80 | C | -20.3076 | 0.9769  | -0.0660 | 109 | H | -29.1585 | -2.1016 | -0.6830 |
| 52 | C | -4.4448  | -3.3069 | 1.0928  | 81 | C | -21.6086 | 1.4368  | 0.0823  | 110 | H | -26.5924 | -2.5070 | -0.9116 |
| 53 | H | 14.0750  | -1.6287 | 1.1121  | 82 | C | -22.6519 | 0.4988  | 0.0036  | 111 | H | -32.2546 | 2.8999  | 0.8496  |
| 54 | H | 15.4324  | 0.5311  | 0.5365  | 83 | C | -22.3413 | -0.8757 | -0.1921 | 112 | H | -29.7049 | 2.5479  | 0.3410  |
| 55 | H | 7.7610   | 1.4278  | -0.4830 | 84 | C | -18.5927 | -0.6111 | -0.4228 | 113 | H | -21.3600 | -3.3982 | 1.3535  |
| 56 | H | 9.1572   | 3.1987  | 1.1048  | 85 | C | -17.8461 | 0.5319  | -0.3406 | 114 | H | -19.6172 | -3.0499 | 1.1753  |
| 57 | H | 10.8948  | 3.5794  | 1.2677  | 86 | S | -18.8561 | 1.9648  | -0.0596 | 115 | H | -20.3378 | -4.4540 | 0.3427  |
| 58 | H | 9.9025   | 4.4388  | 0.0603  | 87 | O | -21.8660 | 2.7773  | 0.2475  | 116 | H | -33.5220 | 0.6029  | 1.0791  |
| 59 | H | 3.1813   | -2.5684 | -0.3088 | 88 | O | -20.7825 | -2.6733 | -0.5246 |     |   |          |         |         |

**Figure S1:** Plots of the simulated absorption spectra, calculated at the TD-B3LYP/6-311G(d,p) level for the A-G oligomers.

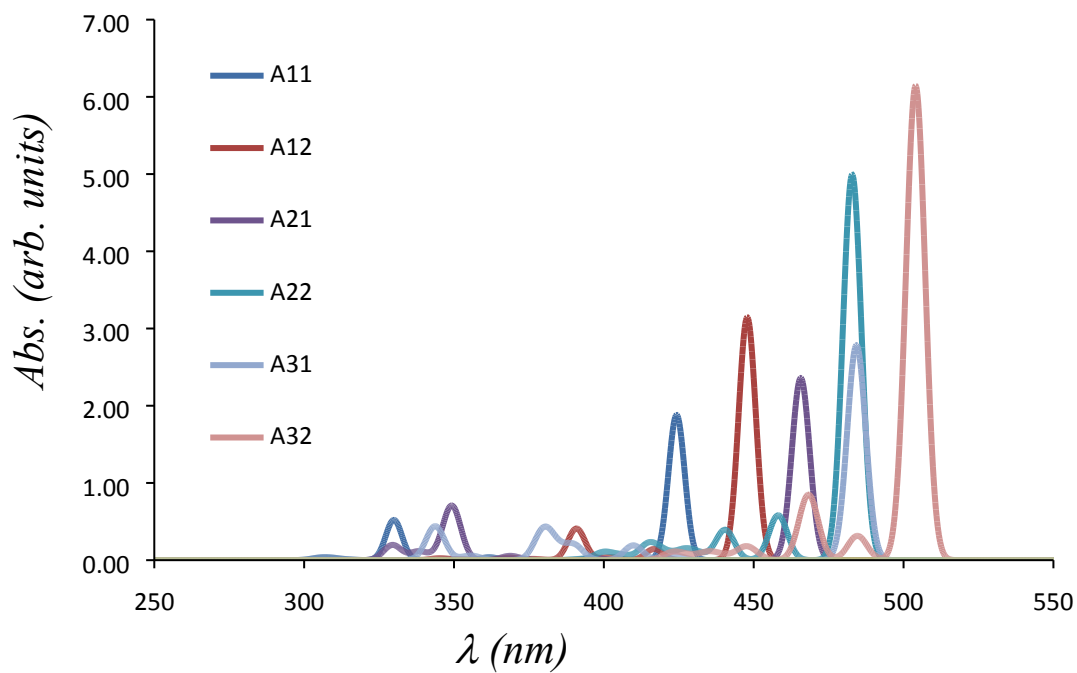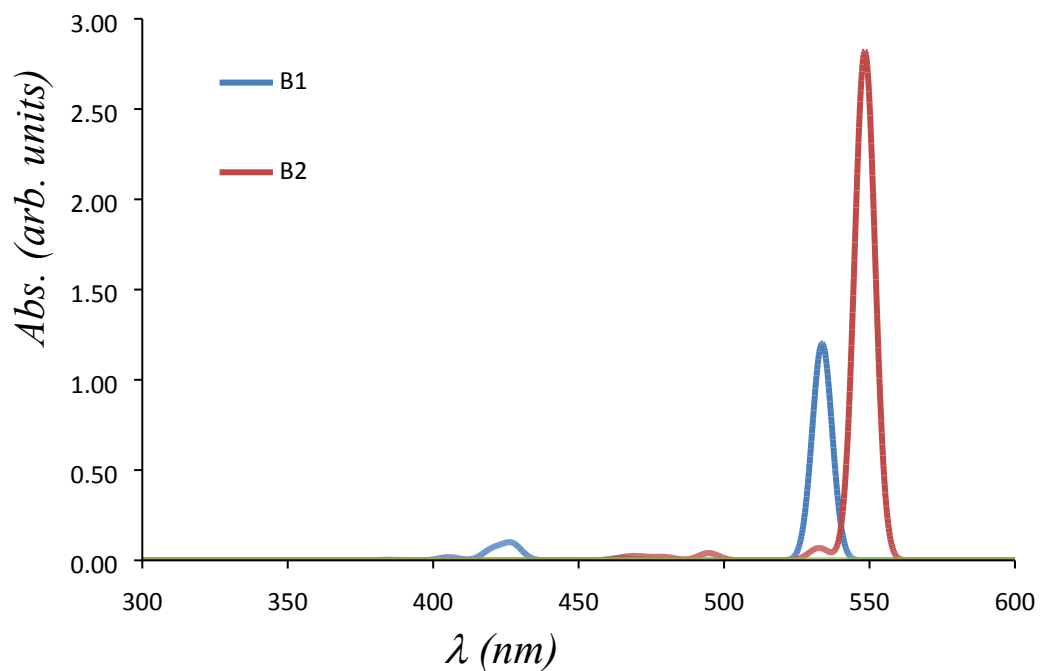

Figure S1: continue.

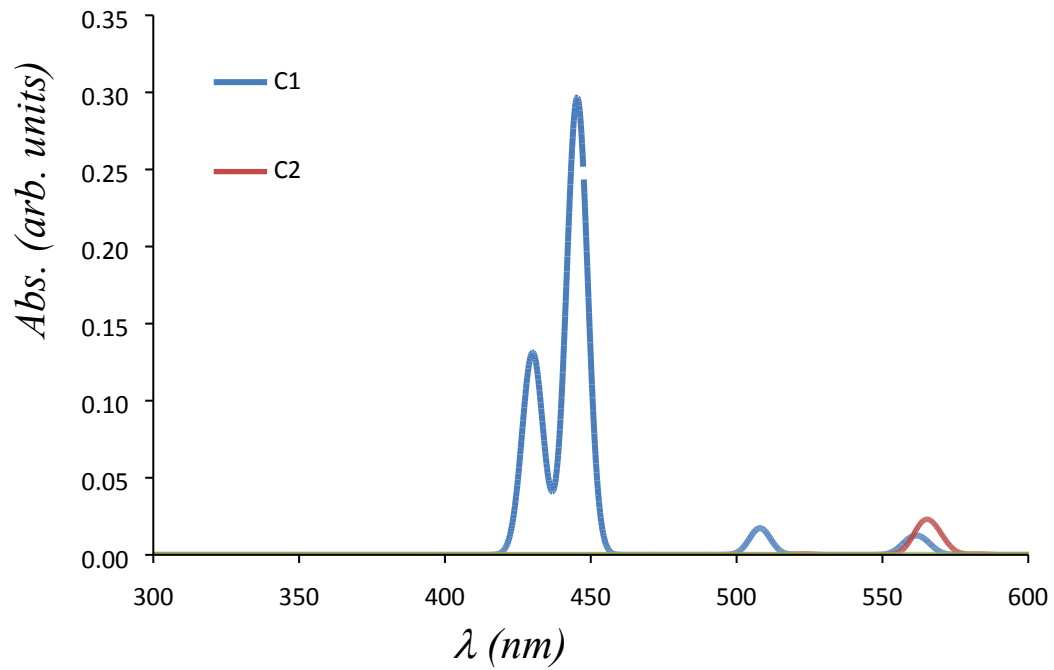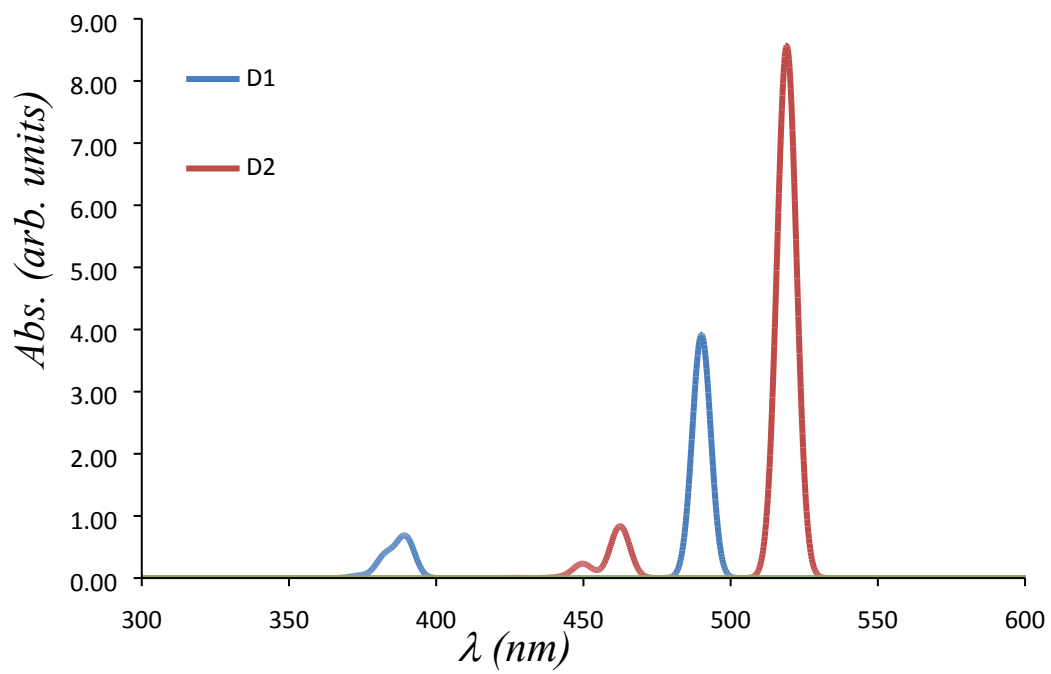

Figure S1: continue.

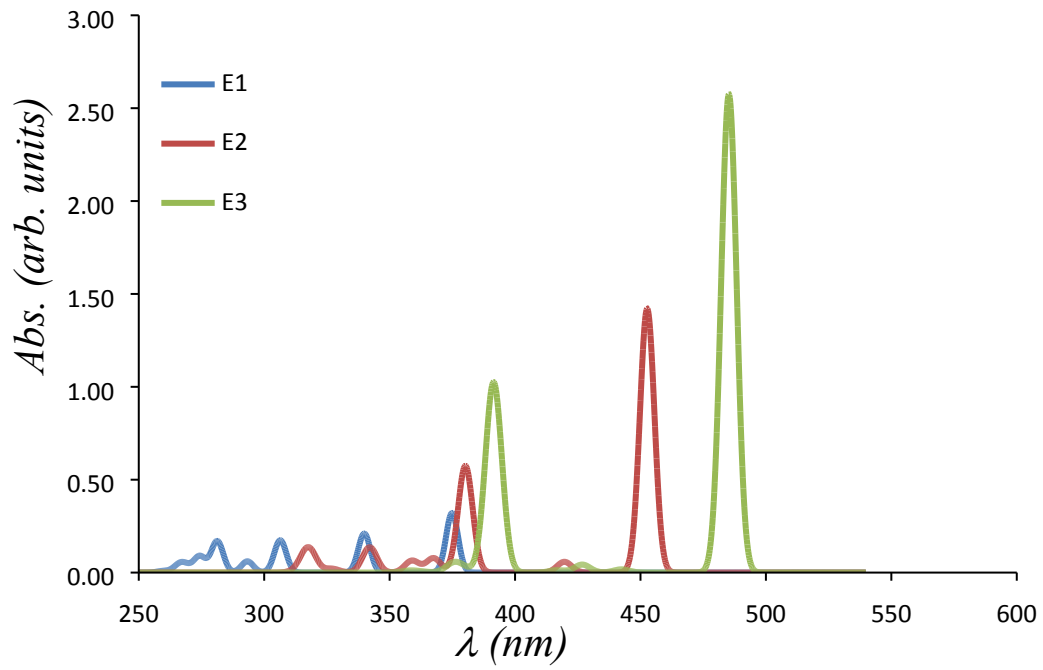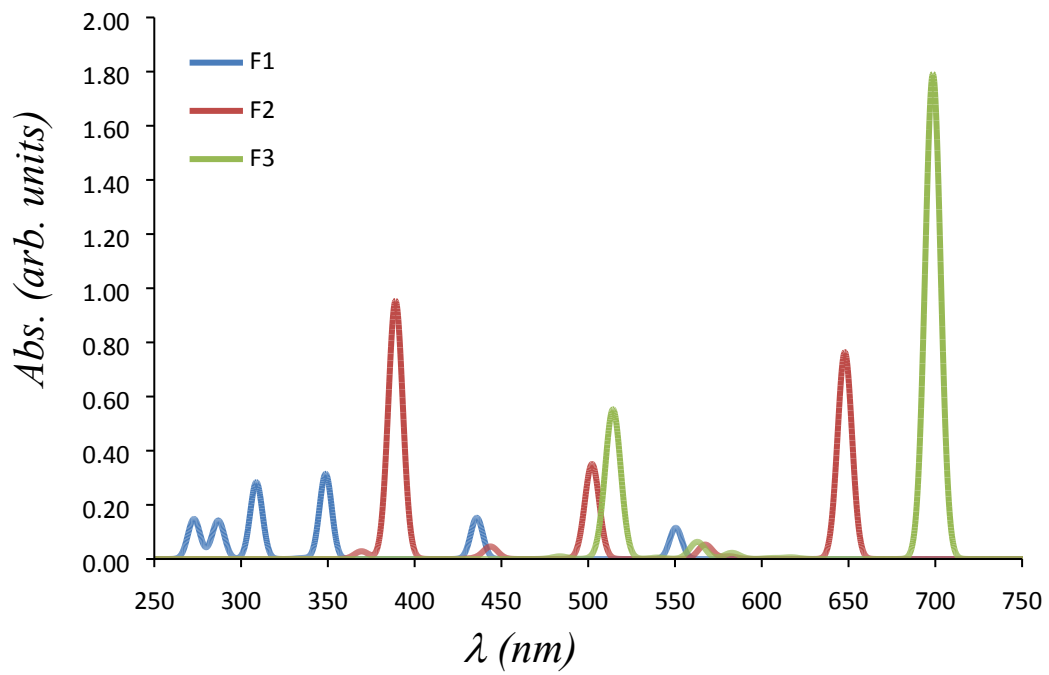

Figure S1: continue.

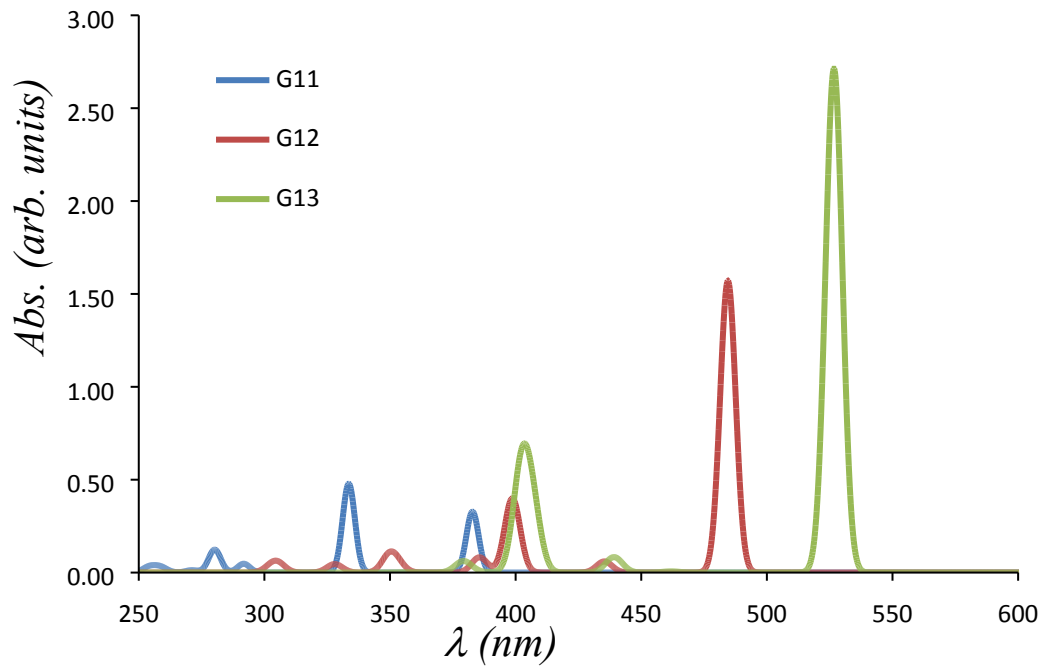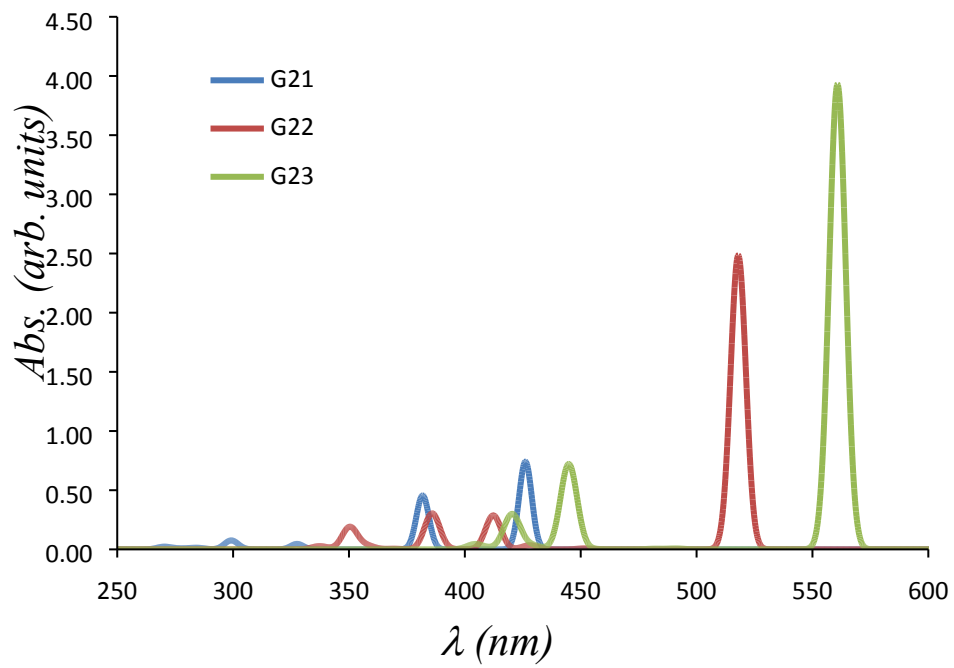

Supplement: c5ra15907e1.pdf [file c5ra15907e1.pdf]
